# Supplementary material for: Heritable L1 retrotransposition in the mouse primordial germline and early embryo
Source: PubMed Central journal article supplement (PMC5538555; doi:10.1101/gr.219022.116), 2017-08
Supplement: supp_gr.219022.116_Supplemental_fig_S2.pdf [file supp_gr.219022.116_Supplemental_fig_S2.pdf]

# Supplemental Figure 2

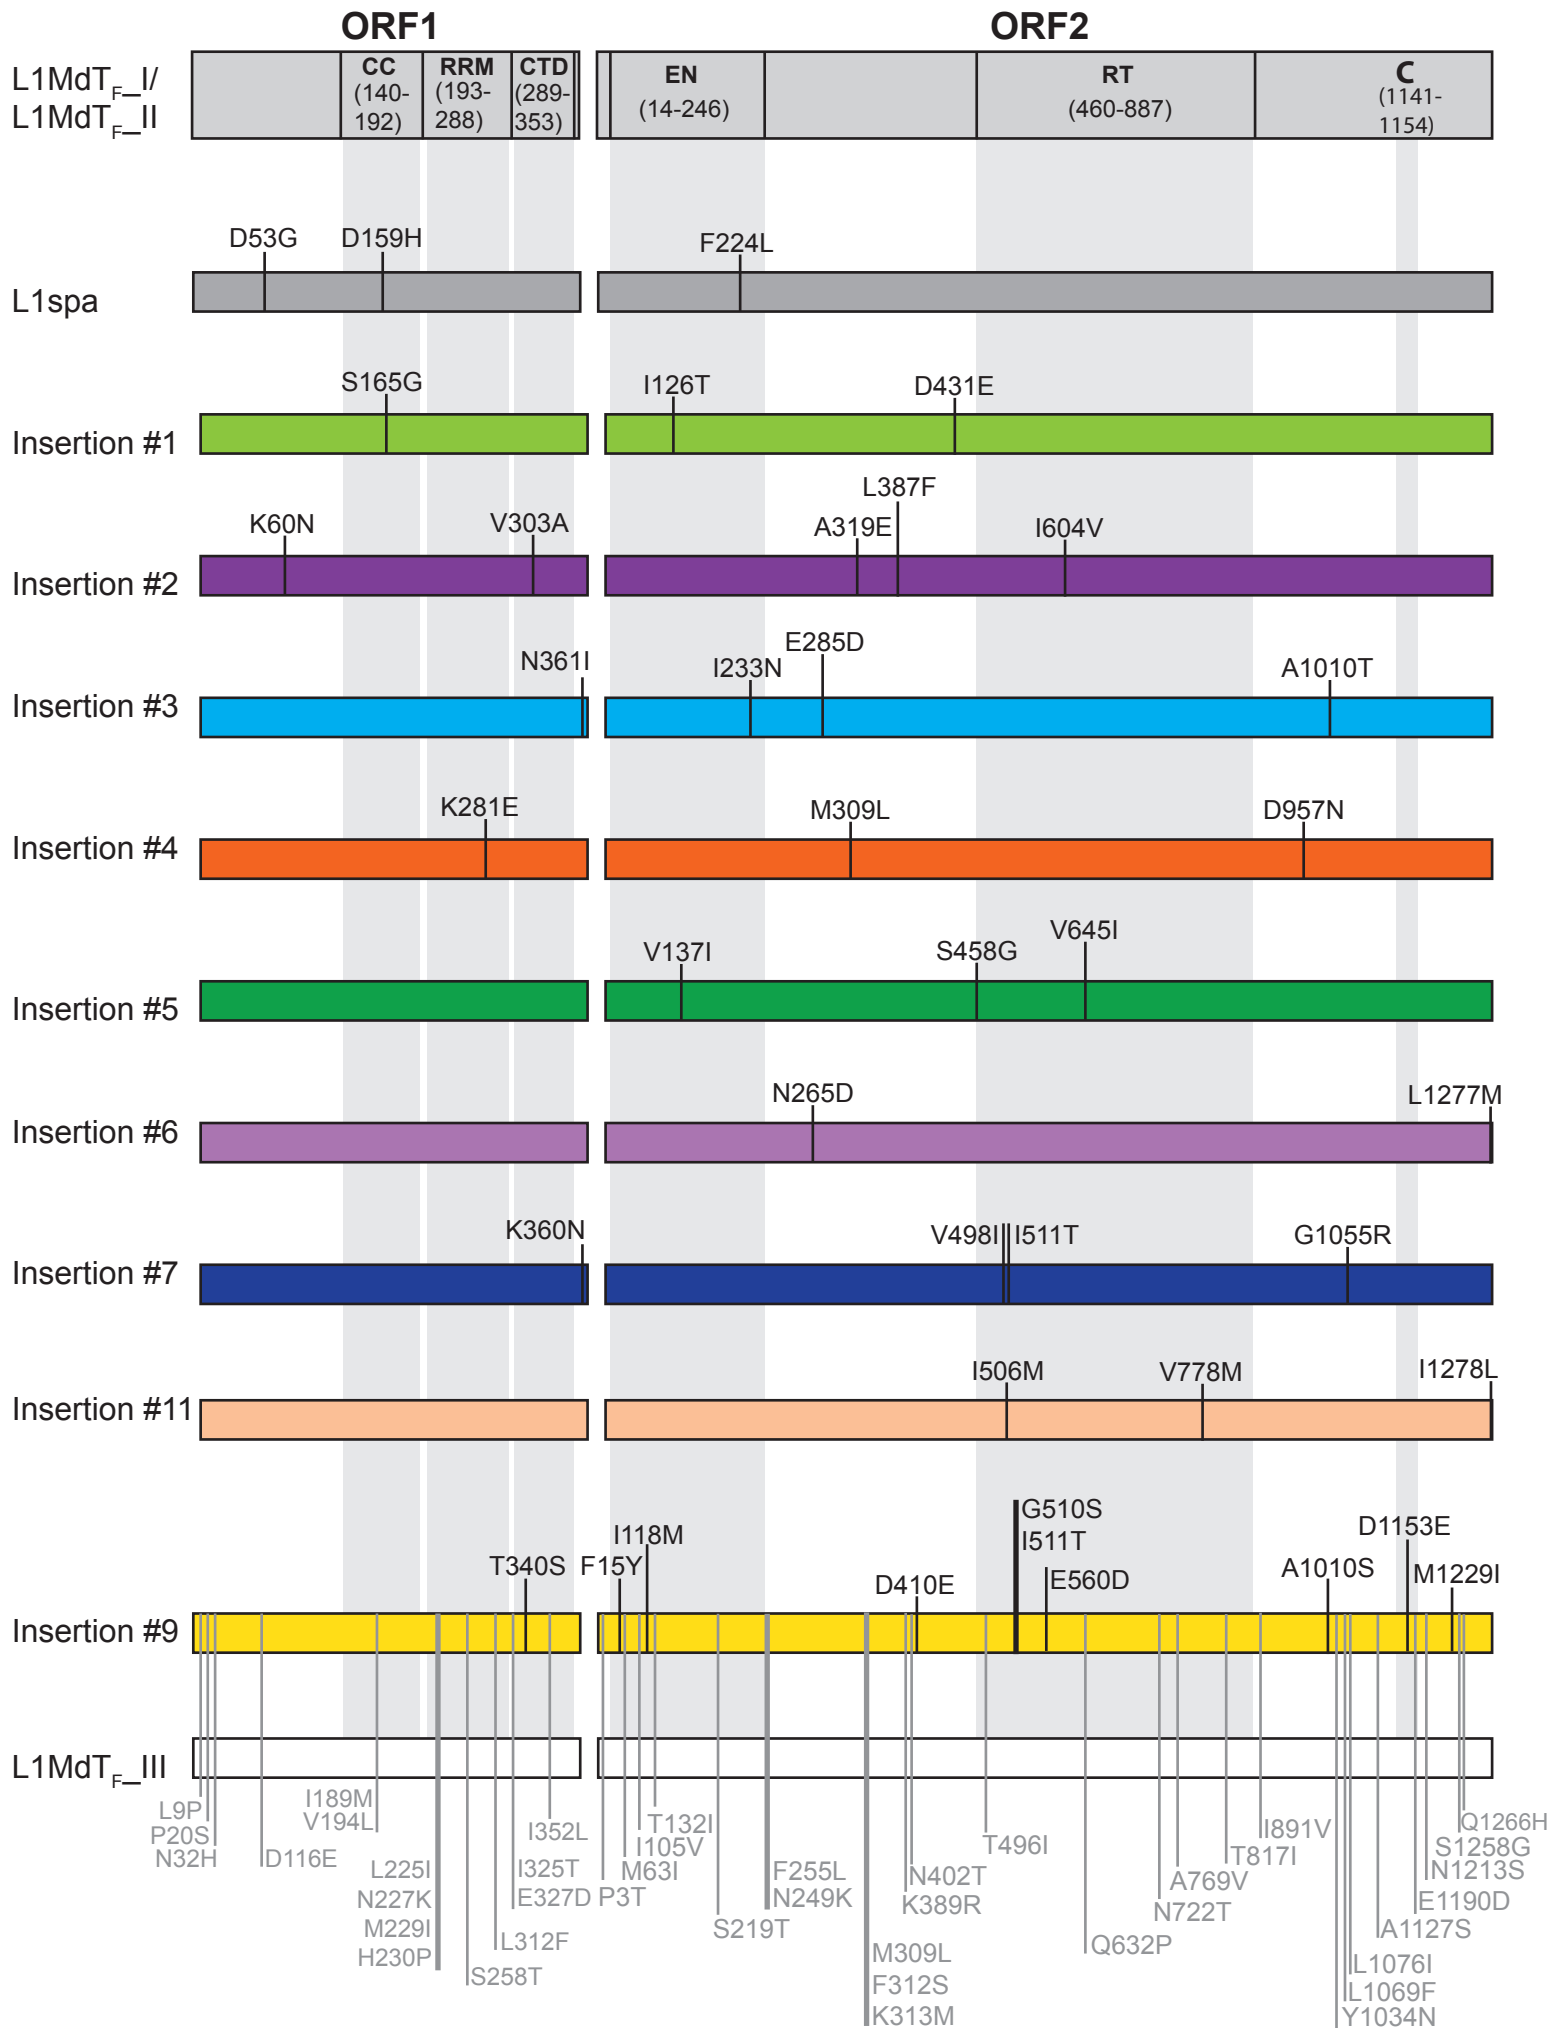

## Supplemental Figure S2. Sequence comparison of *de novo* L1 insertions

Amino acid substitutions in ORF1 and ORF2 of L1<sub>spa</sub> and 9 fully sequenced *de novo* L1 insertions from this study, compared to the amino acid sequence of the L1MdT<sub>F\_I</sub> and L1MdT<sub>F\_II</sub> consensus sequences (Sookdeo et al. 2013). The amino acid sequences of L1MdT<sub>F\_I</sub> and L1MdT<sub>F\_II</sub> are identical to one another. The locations of functional domains in ORF1 and ORF2 are shown: CC = coiled-coil, RRM = RNA recognition motif, CTD = C-terminal domain, EN = endonuclease, RT = reverse transcriptase, C = cysteine-rich motif. Insertion #9 closely resembles the L1MdT<sub>F\_III</sub> consensus. Amino acid substitutions relative to L1MdT<sub>F\_I</sub>/L1MdT<sub>F\_II</sub> that are shared by insertion #9 and the L1MdT<sub>F\_III</sub> consensus are indicated below the L1MdT<sub>F\_III</sub> schematic, in grey. Amino acid substitutions unique to insertion #9 are shown above the insertion #9 schematic in black.
