# Supplementary material for: Heritable L1 retrotransposition in the mouse primordial germline and early embryo
Source: PubMed Central journal article supplement (PMC5538555; doi:10.1101/gr.219022.116), 2017-08
Supplement: supp_gr.219022.116_Supplemental_fig_S3.pdf [file supp_gr.219022.116_Supplemental_fig_S3.pdf]

# Supplemental Figure 3 (cont'd)

## Poly\_L1Tf\_4 chr17 (qB2), +strand

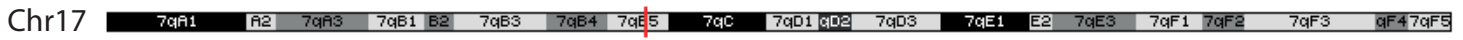

Filled site:

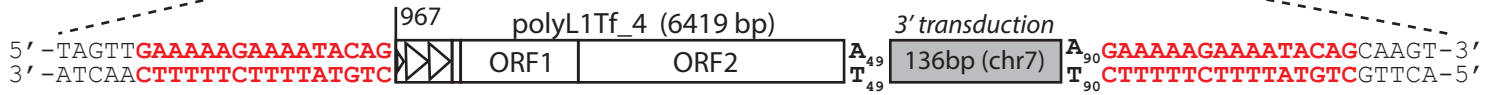

Empty site:

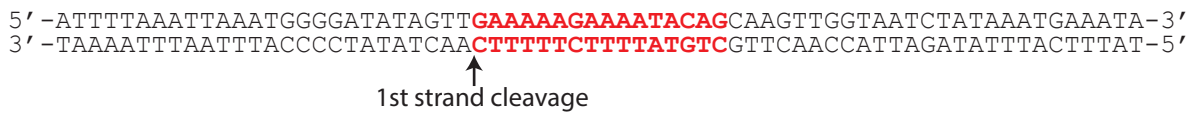

L1 subfamily: Tf  
Monomers: 2 + 83 bp

TSD: 16 bp  
(Chr17; 41,334,114 - 41,334,129)

EN motif: 5'-TTTC/AA-3'

## Poly\_L1Tf\_5 chr1 (qE2.1), -strand

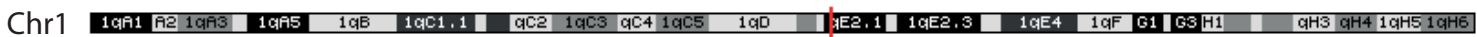

Filled site:

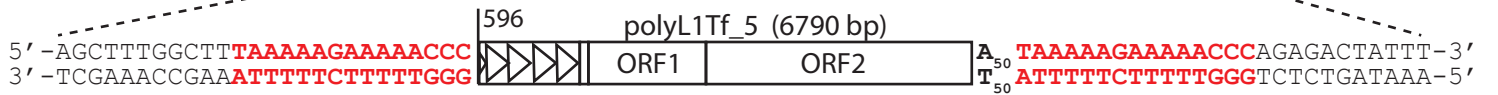

Empty site:

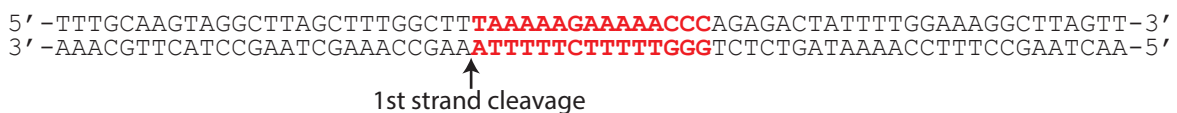

L1 subfamily: Tf  
Monomers: 4 + 34 bp

TSD: 15 bp  
(Chr1, 104,818,661 - 104,818,675)

EN motif: 5'-TTTA/AA-3'

# Supplemental Figure 3 (cont'd)

## Poly\_L1Tf\_10 chr10 (qB1), +strand

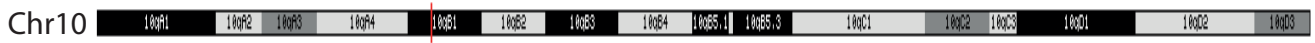

Filled site:

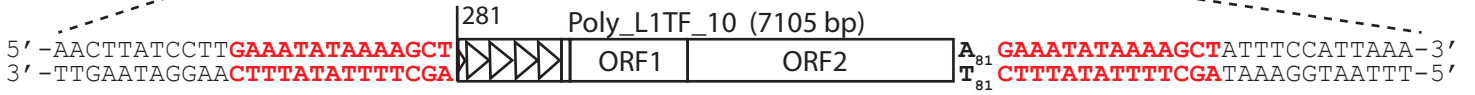

Empty site:

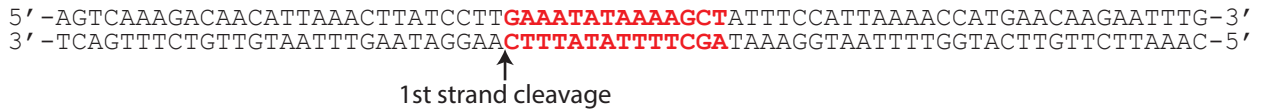

L1 subfamily: Tf

Monomers: 4 + 96 bp

TSD: 14 bp

(Chr10, 36,022,472 - 36,022,486)

EN motif: 5'-TTTC/AA-3'

## polyL1Tf\_11

chr15 (qB3.1), +strand

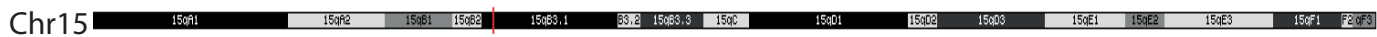

Filled site:

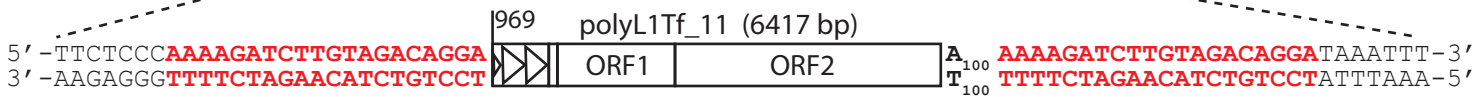

Empty site:

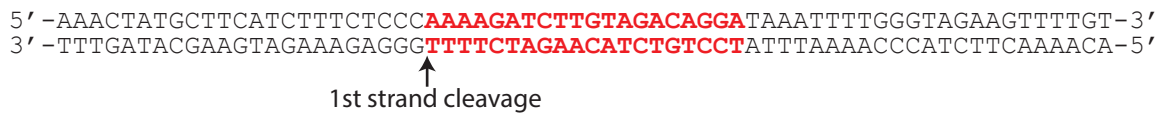

L1 subfamily: Tf

Monomers: 2 + 81 bp

TSD: 20 bp

(Chr15, 45,572,157 - 45,572,177)

EN motif: 5'-TTTT/GG-3'

## Poly\_L1Tf\_12

chr5 (qC3.1), +strand

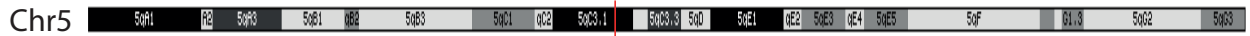

Filled site:

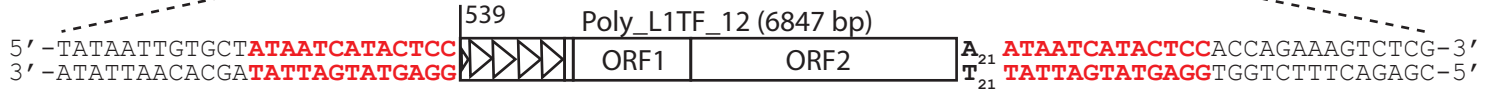

Empty site:

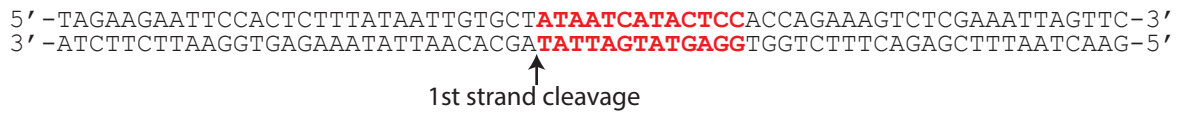

L1 subfamily: Tf

Monomers: 4 + 61 bp

TSD: 13 bp

(Chr5, 69,153,918 - 69,153,936)

EN motif: 5'-TTAT/AG-3'

## polyL1Tf\_14

chr11 (qD), +strand

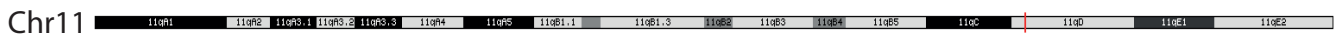

Filled site:

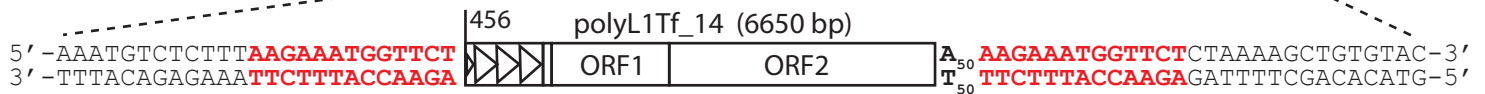

Empty site:

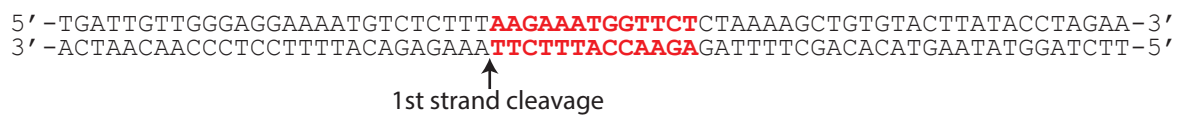

L1 subfamily: Tf

Monomers: 3 + 101 bp

TSD: 13 bp

(Chr11, 91,759,570 - 91,759,583)

EN motif: 5'-TCTT/AA-3'

## polyL1Tf\_15

chr12 (qC1), +strand

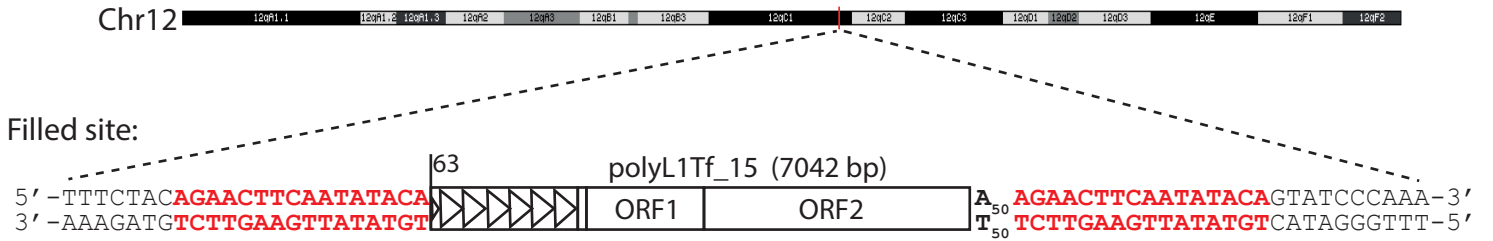

Empty site:

5' -GTTGCTGACTTAAATTTTTTTTCTACAGAACTTCAATATACA-3'

3' -CAACGACTGAATTTAAAAAAAAGATGTCTTGAAGTTATATGT-5'

↑

1st strand cleavage

L1 subfamily: Tf

Monomers: 6 + 78 bp

TSD: 16 bp

(Chr12, 64,779,624 - 64,779,640)

EN motif: 5'-TTCT/GT-3'

## Poly\_L1Tf\_18

chr4 (qE1), -strand

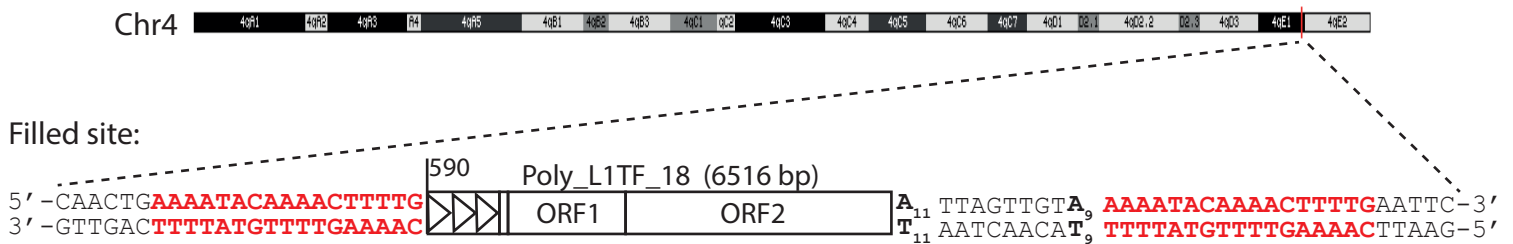

Empty site:

5' -CTCGTGAATCTATTACTGGCACAAC T GAAAATACAAAACTTTTGAATTCACCAATATTCTTCTTTATTAT-3'

3' -GAGCACTTAGATAATGACCGTGTGAC T TTTTATGTTTTGAAAAC TTAAGTGGTTATAAGAAGAGAAATAATA-5'

↑

1st strand cleavage

L1 subfamily: Tf

Monomers: 3

TSD: 17 bp

(Chr4, 147,497,685 - 147,497,704)

EN motif: 5'-TTTT/CA-3'

# Supplemental Figure 3 (cont'd)

## Poly\_L1Tf\_19

chr7 (qC), +strand

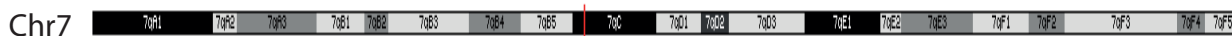

Filled site:

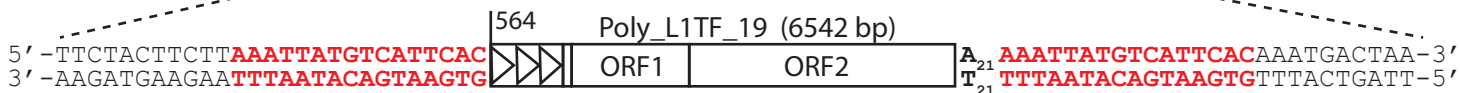

Empty site:

5' -GCATCTTCTGCGTTTATAAGAAATCTTCTACTTCTTAAATTATGTCATTCACAAATGACTAATCCATGTTG-3'  
 3' -CGTAGAAGACGCAAATATTCTTTAGAAAGATGAAGAA TTTAATACAGTAAGTGTTTACTGATTAAGGTACAAC-5'

↑  
1st strand cleavage

L1 subfamily: Tf  
 Monomers: 3

TSD: 16 bp  
 (Chr7, 62,347,340 - 62,347,358)

EN motif: 5'-ATTT/AA-3'

# Supplemental Figure 3 (cont'd)

## Poly\_B1\_1

chr16 (qC3.3), +strand

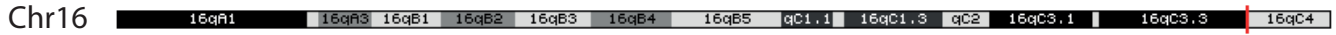

Filled site:

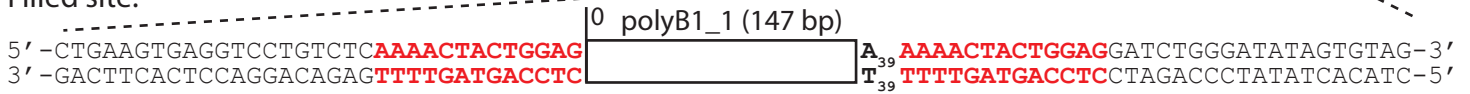

Empty site:

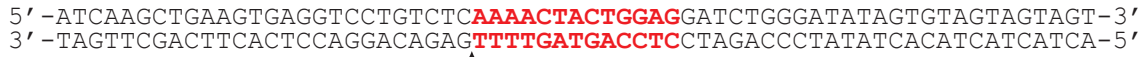

↑  
1st strand cleavage

SINE family: B1

TSD: 13 bp  
(Chr16, 91599058 - 91599070)

EN motif: 5'-TTTT/GA-3'

## Poly\_B1\_2

chr4 (qE1), -strand

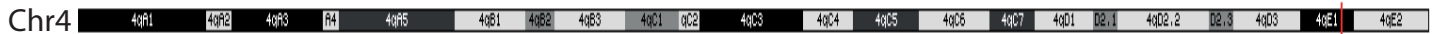

Filled site:

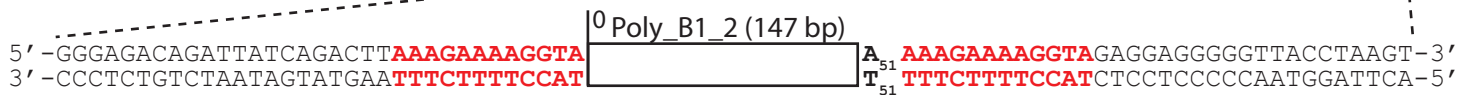

Empty site:

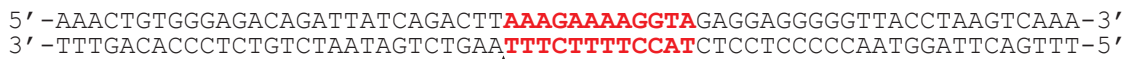

↑  
1st strand cleavage

SINE subfamily: B1

TSD: 12 bp  
(Chr4, 146,430,138 - 146,430,150)

EN motif: 5'-CTTT/AA-3'

## Poly\_B2\_1

chrX (qA4), +strand

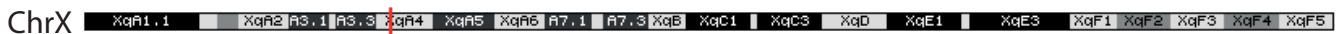

Filled site:

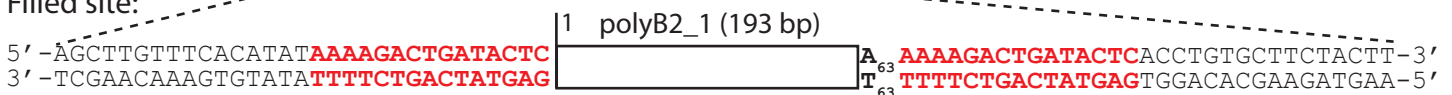

Empty site:

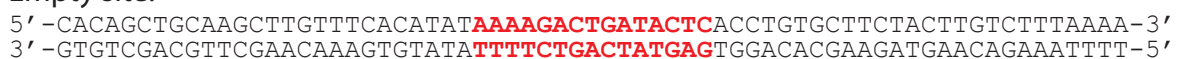

↑  
1st strand cleavage

SINE family: B2

TSD: 15 bp  
(Chr5, 41,903,727-41,903,741)

EN motif: 5'-TTTT/AT-3'

# Supplemental Figure 3 (cont'd)

## Poly\_B2\_2

chr5 (qE3), +strand

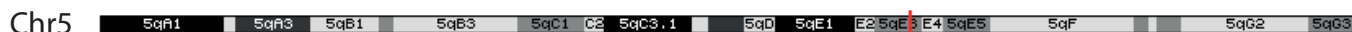

Filled site:

5' -CATGGACAGATCTTTT**AAAACATGACCATCC** [0 polyB2\_2 (193 bp)] **A**<sub>100</sub> **AAAACATGACCATCC**AAAAATAGAAGCAAGAT-3'  
 3' -GTACCTGTCTAGAAAA**TTTTGTACTGGTAGG** **T**<sub>100</sub> **TTTTGTACTGGTAGG**TTTTATCTTCGTTCTA-5'

Empty site:

5' -ATATTGAAGACATGGACAGATCTTTT**AAAACATGACCATCC**AAAAATAGAAGCAAGATGTTAGGGAGC-3'  
 3' -TATAACTTCTGTACCTGTCTAGAAAA**TTTTGTACTGGTAGG**TTTTATCTTCGTTCTACAATCCCTCG-5'

↑  
1st strand cleavage

SINE subfamily: B2

TSD: 15 bp  
(Chr5, 98060042 - 98060056)

EN motif: 5'-TTTT/AA-3'

## Poly\_B2\_3

chr4 (qE1), +strand

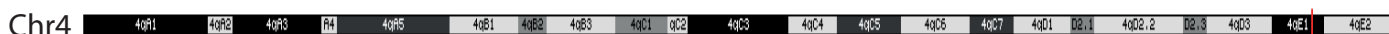

Filled site:

5' -TGACTCCCACTGTGCTATCAAAAATTAAAA**TA** [2 Poly\_B2\_3 (192 bp)] **A**<sub>10</sub> **TA**AGCCAGGCAGTGGTGACACATGCCTTTA-3'  
 3' -ACTGAGGGTGACACGATAGTTTTTAATTTT**AT** **T**<sub>10</sub> **AT**TCGGTCCGTACCACCTGTGTACGGAAAT-5'

Empty site:

5' -GCCAAAAACTCTGACTCCCACTGTGCTATCAAAAATTAAAA**TA**AGCCAGGCAGTGGTGACACATGCCTTTAATC-3'  
 3' -CGTTTTTTGAGACTGAGGGTGACACGATAGTTTTTAATTTT**AT**TCGGTCCGTACCACCTGTGTACGGAAATAG-5'

↑  
1st strand cleavage

SINE subfamily: B2

TSD: 2 bp  
(Chr4, 146,493,190 - 146,493,204)

EN motif: 5'-TTTT/AT-3'

## Poly\_B2\_4

chr9 (qD), +strand

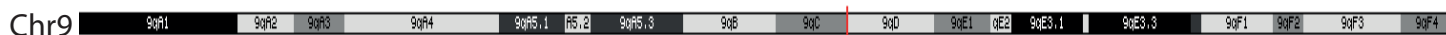

Filled site:

5' -GGTTCATAAGTTTTTCGTTGTC**AAAACTGCT** [2 Poly\_B2\_4 (192 bp)] **A**<sub>10</sub> **AAAACTGCT**AAGAAATGTTAGTCTCATAT-3'  
 3' -CCAAGATTTCAAAAAGCAACAG**TTTTTGACGA** **T**<sub>10</sub> **TTTTTGACGA**TTCTTTACAATCAGAGTATA-5'

Empty site:

5' -TCAAAAAACAGAGGTTCTAAAGTTTTTCGTTGTC**AAAACTGCT**AAGAAATGTTAGTCTCATATCTAGCTTACT-3'  
 3' -AGTTTTTTTGTCTCCAAGATTTCAAAAAGCAACAG**TTTTTGACGA**TTCTTTACAATCAGAGTATAGATCGAATGA-5'

↑  
1st strand cleavage

SINE subfamily: B2

TSD: 10 bp  
(Chr9, 69,742,273 - 69,742,283)

EN motif: 5'-TTTT/GA-3'



**Supplemental Figure S3. Structures of polymorphic retrotransposon insertions absent from the C57BL/6J reference genome (GRCm38/mm10).**

For each structure, the relative location of the insertion is shown on the chromosome. The filled-site diagram denotes target-site duplications (TSDs), promoter monomer units for L1 insertions are shown as triangles, ORF1 and ORF2 are indicated as open rectangles. The truncation point for each insertion relative to the L1MdTf\_I consensus(Sookdeo et al. 2013) is indicated. A<sub>n</sub>/T<sub>n</sub> indicates poly(A) sequence length. Below, the sequence of the empty site is shown, with TSDs and the site of first-strand cleavage indicated. Characteristics of each insertion (retroelement family, monomer number for L1 insertions, TSD length and chromosomal location, and endonuclease (EN) cleavage motif) are summarized below. 3' transductions are indicated as filled grey rectangles.
