# Supplementary material for: Heritable L1 retrotransposition in the mouse primordial germline and early embryo
Source: PubMed Central journal article supplement (PMC5538555; doi:10.1101/gr.219022.116), 2017-08
Supplement: supp_gr.219022.116_Supplemental_fig_S9.pdf [file supp_gr.219022.116_Supplemental_fig_S9.pdf]

# Supplemental Figure 9

A.

Factor VIII gene

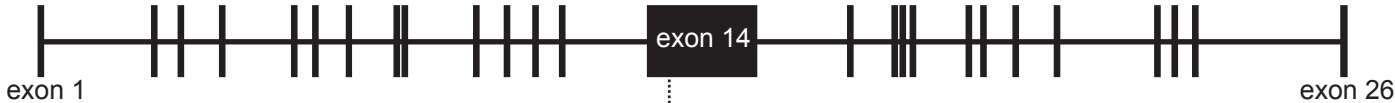

L1 Insertion in Patient JH-27

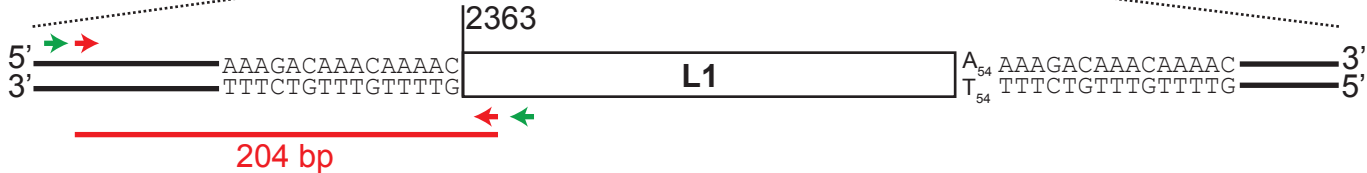

B.

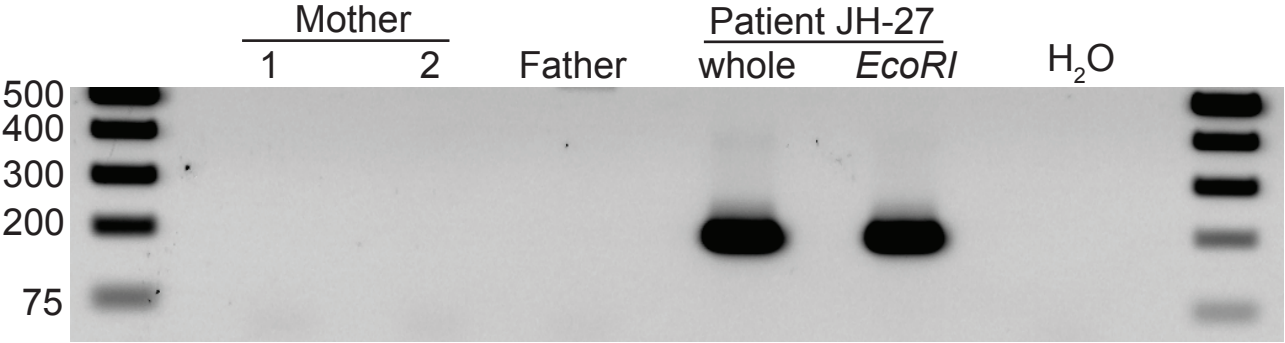

**Supplemental Figure S9. PCR genotyping of the JH-27 human L1 insertion.**

A. The relative position of the JH-27 insertion within exon 14 of the Factor VIII gene is depicted. Structural features of the insertion, including target-site duplications, poly(A) tail, and 5' truncation point are indicated. The relative positions of the nested PCR primers used for genotyping and the expected PCR fragment are shown; inner primers are indicated in red; outer primers are shown in green.

B. PCR genotyping of JH-27 insertion. From left, PCR templates comprised two samples of maternal blood gDNA, paternal blood gDNA, patient JH-27 blood gDNA, a sample of patient JH-27 blood gDNA that had previously been digested with EcoRI, and water (no template control).
