# Supplementary material for: Heritable L1 retrotransposition in the mouse primordial germline and early embryo
Source: PubMed Central journal article supplement (PMC5538555; doi:10.1101/gr.219022.116), 2017-08
Supplement: supp_gr.219022.116_Supplemental_Table_3.pdf [file supp_gr.219022.116_Supplemental_Table_3.pdf]

**Supplemental Table 3: Polymorphic Retroelement Insertions**

| <b>Insertion</b>          | <b>Location</b> | <b>T<sub>F</sub><br/>Monomers</b> | <b>Cleavage</b> | <b>TSD<br/>(bp)</b> | <b>PolyA<br/>(bp)</b> | <b>Fixed?</b> |
|---------------------------|-----------------|-----------------------------------|-----------------|---------------------|-----------------------|---------------|
| Poly_B1_1                 | 16q             | n/a                               | TTTT/GA         | 13                  | ~39                   | no            |
| Poly_B1_2                 | 4q              | n/a                               | CTTT/AA         | 12                  | ~51                   | no            |
| Poly_B2_1                 | Xq              | n/a                               | TTTT/AT         | 15                  | ~63                   | no            |
| Poly_B2_2                 | 5q              | n/a                               | TTTT/AA         | 15                  | ~100                  | yes           |
| Poly_B2_3                 | 4q              | n/a                               | TTTT/AT         | 2                   | 0                     | yes           |
| Poly_B2_4                 | 9q              | n/a                               | TTTT/GA         | 10                  | ~87                   | yes           |
| Poly_L1T <sub>F</sub> _1  | 15q             | 3.5                               | CTTT/AA         | 12                  | ~100                  | no            |
| Poly_L1T <sub>F</sub> _3  | 6q              | 2.5                               | TCTT/AT         | 14                  | ~86*                  | no            |
| Poly_L1T <sub>F</sub> _4  | 17q             | 2.5                               | TTTC/AA         | 16                  | ~90*                  | no            |
| Poly_L1T <sub>F</sub> _5  | 1q              | 4.5                               | TTTA/AA         | 15                  | ~50                   | no            |
| Poly_L1T <sub>F</sub> _10 | 10q             | 5.5                               | TTTC/AA         | 14                  | ~81                   | yes           |
| Poly_L1T <sub>F</sub> _11 | 15q             | 2.5                               | TTTT/GG         | 20                  | ~110                  | yes           |
| Poly_L1T <sub>F</sub> _12 | 5q              | 4.5                               | TTAT/AG         | 13                  | ~21                   | yes           |
| Poly_L1T <sub>F</sub> _14 | 11q             | 3.5                               | TCTT/AA         | 13                  | ~44                   | no            |
| Poly_L1T <sub>F</sub> _15 | 12q             | 6.5                               | TTCT/GT         | 16                  | ~54                   | no            |
| Poly_L1T <sub>F</sub> _18 | 4q              | 3                                 | TTTT/CA         | 17                  | ~30                   | yes           |
| Poly_L1T <sub>F</sub> _19 | 7q              | 3                                 | ATTT/AA         | 16                  | ~21                   | yes           |

**Supplemental Table 3. Characteristics of polymorphic retrotransposon insertions characterized in this study.** All L1 insertions shown are L1 T<sub>F</sub> elements; T<sub>F</sub> monomers = the number of repetitive promoter units contained by each insertion. Cleavage indicates the L1 endonuclease cleavage motif, shown 5' to 3'. TSD = target-site duplication length, Poly(A) = poly(A) tract length. Poly(A) tract lengths were determined by Sanger sequencing and should be regarded as estimates. Insertions denoted as fixed were detected in all animals assessed by mRC-seq in this study; those denoted as not fixed were differentially present/absent among animals. Insertions marked with an asterisk contain a 3' transduction (see Fig. S3).
