# Supplementary material for: Heritable L1 retrotransposition in the mouse primordial germline and early embryo
Source: PubMed Central journal article supplement (PMC5538555; doi:10.1101/gr.219022.116), 2017-08
Supplement: supp_gr.219022.116_Supplemental_Table_5.pdf [file supp_gr.219022.116_Supplemental_Table_5.pdf]

**Supplemental Table 5: mRC-seq Read Counts for Mosaic Insertions**

|                        | <b>% Prevalence:<br/>insertion #3</b> | <b>Reads:<br/>insertion #3</b> | <b>Reference L1 5' end<br/>sequencing depth<br/>(fold)</b> |
|------------------------|---------------------------------------|--------------------------------|------------------------------------------------------------|
| <b>SRA Liver</b>       | 7.5                                   | 0                              | 34.79                                                      |
| <b>SRA Brain</b>       | 3.7                                   | 0                              | 37.28                                                      |
| <b>SRA Muscle</b>      | 4.2                                   | 0                              | 21.62                                                      |
| <b>SRA Right Ovary</b> | 27.5                                  | 1                              | 26.89                                                      |
| <b>SRA Left Ovary</b>  | 9.1                                   | 0                              | 27.33                                                      |

  

|                        | <b>% Prevalence:<br/>insertion #5</b> | <b>Reads:<br/>insertion #5</b> | <b>Reference L1 5' end<br/>sequencing depth<br/>(fold)</b> |
|------------------------|---------------------------------------|--------------------------------|------------------------------------------------------------|
| <b>SRE Liver</b>       | 0.2                                   | 0                              | 53.59                                                      |
| <b>SRE Brain</b>       | 0.6                                   | 1                              | 27.38                                                      |
| <b>SRE Heart</b>       | 0.2                                   | 0                              | 27.60                                                      |
| <b>SRE Right Ovary</b> | 1.5                                   | 0                              | 30.16                                                      |
| <b>SRE Left Ovary</b>  | 0.4                                   | 0                              | 31.14                                                      |

  

|                              | <b>% Prevalence:<br/>insertion #7</b> | <b>Reads:<br/>insertion #7</b> | <b>Reference L1 5' end<br/>sequencing depth<br/>(fold)</b> |
|------------------------------|---------------------------------------|--------------------------------|------------------------------------------------------------|
| <b>SRCD14 Right Testicle</b> | 3.6                                   | 2                              | 277.06                                                     |
| <b>SRCD14 Left Testicle</b>  | 11.5                                  | 13                             | 238.56                                                     |

**Supplemental Table 5. mRC-seq read counts for mosaic insertions.** For each insertion (#3, #5, #7) where the tissues of the appropriate mosaic animal were assayed individually by mRC-seq, the percent prevalence of the insertion and the mRC-seq read count are shown. As a reference for sequence capture efficiency and sequencing depth for each library, sequencing depth achieved for reference L1 5' ends is shown. For insertion #6 in mouse SRCD10, the tissues of mouse SRCD10 were not analyzed individually by mRC-seq, so read counts and reference L1 sequencing depth are denoted as n/a. Full statistics for each library can be found in Supplemental Table 1.
