# Supplementary material for: Heritable L1 retrotransposition in the mouse primordial germline and early embryo
Source: Genome Res. 2017 Aug;27(8):1395–405. doi: 10.1101/gr.219022.116 (PMC5538555; doi:10.1101/gr.219022.116)
Supplement: Supplemental Material [file supp_gr.219022.116_Supplemental_table_1.xlsx]

## Sheet: library stats
	Supplemental Table 1. mRC-seq libraries (first tab), sequencing pools (second tab) and probe pools (third tab). The first tab contains the details of each library used in this study including the age and gender of the mouse tissues from which it was derived, the library insert size, number of total reads and mapped reads, and the sequencing depth to which reference retroelement insertions were de…
Mouse	Age	Sex	Tissue	Library name	Method	Median Insert Size (bp)	Total reads	Mapped reads	L1A,L1Tf,L1Gf			IAP,Etn LTR			B1,B2 SINE
									Reference 5' sequencing depth (fold)	Reference 3' sequencing depth (fold)	Reference detected (%)	Reference 5' sequencing depth (fold)	Reference 3' sequencing depth (fold)	Reference detected (%)	Reference 5' sequencing depth (fold)	Reference 3' sequencing depth (fold)	Reference detected (%)
SRA	26 weeks	F	Mix	090515.SRA	mRC-seq	550	39483579	28483590	36.9657	3.44921	99.7139	32.6071	5.15689	99.8636	63.9167	65.3954	99.5098
			Brain	070815.SRA.Brain	mRC-seq	450	25817339	19286527	37.2833	2.8784	99.8569	32.367	6.41883	99.5907	84.1732	87.4412	99.5098
			Liver	070815.SRA.Liver	mRC-seq	450	25818137	19032283	34.7897	2.90558	99.7139	31.2169	6.24011	99.8636	78.5768	83.616	99.5098
			Muscle	070815.SRA.Muscle	mRC-seq	450	22706886	14702362	21.618	2.25179	99.4278	19.8295	4.74898	99.5907	43.3595	45.4575	99.5098
			Ovary (left)	070815.SRA.Ovary_L	mRC-seq	450	20701677	16167596	27.329	2.43348	98.9986	24.5512	4.76808	99.045	64.0817	69.1977	99.5098
			Ovary (right)	070815.SRA.Ovary_R	mRC-seq	450	19934803	15707959	26.8927	2.32189	99.5708	23.3342	4.794	99.7271	62.1716	65.2794	99.5098
SRB	26 weeks	M	Mix	090515.SRB	mRC-seq	550	32188409	22408280	25.2626	2.88299	98.0952	24.8215	4.36649	100	48.7029	48.7668	99.0415
SRAB1	5 weeks	F	Mix	090515.SRAB1	mRC-seq	550	28453228	17876594	17.7196	2.1073	99.2847	16.7435	4.10914	99.5907	29.6029	27.567	98.8562
SRAB2	5 weeks	F	Mix	090515.SRAB2	mRC-seq	450	53613671	34045518	41.2747	6.72389	99.8569	51.266	12.9427	99.8636	86.75	88.0784	99.5098
SRAB3	5 weeks	F	Mix	090515.SRAB3	mRC-seq	450	42539836	28213242	39.8169	4.80114	99.4278	43.7967	10.4611	99.7271	80.5163	83.5016	99.3464
SRAB4	5 weeks	F	Mix	090515.SRAB4	mRC-seq	550	42888351	27641066	24.4893	3.44778	99.7139	23.5716	5.62619	99.7271	41.2631	40.5147	99.3464
SRAB5	5 weeks	F	Mix	090515.SRAB5	mRC-seq	450	47144465	29255466	37.6953	5.83548	99.8569	45.6112	12.4557	99.7271	79.5458	81.8448	99.183
SRAB6	5 weeks	F	Mix	090515.SRAB6	mRC-seq	450	41290710	27190571	34.6323	4.91416	99.7139	41.9495	10.1392	99.8636	75.3546	73.9951	99.3464
SRAB7	5 weeks	M	Mix	090515.SRAB7	mRC-seq	450	35988775	24414399	33.6884	3.83401	97.551	38.8406	9.02861	99.8638	71.0591	72	98.5623
SRAB8	5 weeks	M	Mix	090515.SRAB8	mRC-seq	450	46261761	30099589	35.8095	5.32245	98.0952	45.9264	11.4523	99.8638	79.6118	80.5	98.8818
SRAB9	5 weeks	M	Mix	090515.SRAB9	mRC-seq	550	30665554	18989767	15.4789	2.41497	98.0952	17.436	4.3297	99.8638	29.8914	28.1661	98.8818
SRAB10	embryonic day 14	M	Mix	090515.SRAB10	mRC-seq	550	19456327	15331340	19.102	2.14558	95.2381	20.3924	3.01907	99.0463	41.7604	45.1869	99.0415
SRAB11	embryonic day 14	F	Mix	090515.SRAB11	mRC-seq	550	20419149	15686123	21.7325	2.33333	98.8555	20.2578	3.02729	99.4543	43.6389	46.768	99.3464
SRAB12	embryonic day 14	F	Mix	090515.SRAB12	mRC-seq	550	16851449	12984195	17.4907	1.82117	98.5694	16.5648	2.66303	99.3179	37.1993	39.4739	99.183
SRAB13	embryonic day 14	M	Mix	090515.SRAB13	mRC-seq	550	19246827	14885737	20.1946	1.90068	95.5102	19.1104	2.99728	99.1826	41.2843	44.6821	98.8818
SRAB14	embryonic day 14	M	Mix	090515.SRAB14	mRC-seq	550	17977470	13972403	18.1075	1.81633	94.2857	16.9877	2.69619	98.9101	38.5623	40.9936	98.5623
SRAB15	embryonic day 14	M	Mix	090515.SRAB15	mRC-seq	550	23251637	18366417	24.4857	2.40408	96.5986	25.4959	3.63215	99.1826	50.3147	54.5144	99.0415
SRAB16	embryonic day 14	M	Mix	090515.SRAB16	mRC-seq	550	31187703	24461327	31.6122	3.09252	96.4626	27.703	5.62807	99.8638	55.5479	55.3674	99.0415
SRAB17	embryonic day 14	F	Mix	090515.SRAB17	mRC-seq	550	33743208	26407423	34.2604	3.69814	99.7139	30.4884	6.36016	99.7271	59.8203	58.6536	99.5098
SRAB18	embryonic day 14	M	Mix	090515.SRAB18	mRC-seq	550	38777198	30522546	30.9592	3.91565	96.8707	34.2684	5.92779	99.5913	68.0863	66.901	99.0415
SRAB19	embryonic day 14	F	Mix	090515.SRAB19	mRC-seq	550	15757645	12597683	17.681	1.69099	98.1402	15.0778	2.95362	99.4543	30.4804	30.3415	98.8562
SRAB20	embryonic day 14	M	Mix	090515.SRAB20	mRC-seq	550	33187322	24779810	25.5102	3.42585	96.4626	28.4401	6.25749	99.8638	50.3546	48.647	98.8818
SRC	19 weeks	F	Mix	090515.SRC	mRC-seq	550	59187948	44239334	69.8426	8.84692	100	65.3165	19.0464	100	134.925	135.453	99.5098
SRD	19 weeks	M	Mix	090515.SRD	mRC-seq	550	58660142	44115440	64.6707	8.38912	98.7755	65.6553	18.1458	100	132.121	136.193	99.0415
SRCD10	39 weeks	F	Mix	090515.SRCD10	mRC-seq	450	61749124	24964896	21.6395	5.97854	99.5708	20.6739	10.8554	99.7271	26.7255	25.9461	99.6732
SRCD11	39 weeks	F	Mix	090515.SRCD11	mRC-seq	450	69717572	39683801	39.5651	8.13734	99.8569	45.6617	12.4393	100	81.317	79.8088	99.5098
SRCD12	39 weeks	F	Mix	090515.SRCD12	mRC-seq	450	78869490	39365987	54.8684	8.04578	100	42.1487	12.6071	99.7271	64.1797	61.4199	99.5098
SRCD13	39 weeks	F	Mix	090515.SRCD13	mRC-seq	450	72889830	25037693	25.6338	5.43777	99.7139	24.8063	9.94679	100	45.6912	44.0261	99.5098
SRCD14	39 weeks	M	Mix	090515.SRCD14	mRC-seq	450	117718794	42324219	50.2816	7.88435	98.9116	50.3324	15.3188	100	87.5319	85.6661	99.0415
			Testes (left)	090515.SRCD14_LT	mRC-seq	450	239985531	190634285	238.562	22.3687	98.7755	210.834	41.3569	99.8638	584.49	579.681	99.0415
			Testes (right)	090515.SRCD14_RT	mRC-seq	450	268259012	214384823	277.057	23.8748	98.9116	232.902	41.9237	99.8638	675.406	678.845	99.0415
SRE	19 weeks	F	Mix	090515.SRE	mRC-seq	450	60090229	46902288	74.5823	8.76681	100	69.6658	18.1064	100	149.294	153.771	99.5098
				300315.SRE.WGS	WGS	450	184998673	142633585	16.329	4.31474	99.8569	12.266	4.93588	99.4543	21.1569	22.6062	99.183
			Brain	070815.SRE.Brain	mRC-seq	450	20959574	16392524	27.3805	2.4392	99.7139	24.0327	4.9618	99.8636	63.0539	65.4314	99.5098
			Liver	070815.SRE.Liver	mRC-seq	450	52239853	14555807	53.5866	2.76109	99.8569	24.7094	8.5075	99.8636	41.3268	35.3742	99.5098
			Muscle	070815.SRE.Muscle	mRC-seq	450	22092389	17163619	27.6037	2.64378	99.5708	26.3806	5.29195	99.7271	67.7108	70.2631	99.5098
			Ovary (left)	070815.SRE.Ovary_L	mRC-seq	450	20887681	16057588	31.1416	2.38484	99.7139	27.8022	5.4925	99.4543	70.7778	76.8856	99.5098
			Ovary (right)	070815.SRE.Ovary_R	mRC-seq	450	22031926	17401453	30.1588	2.58512	99.2847	27.2797	5.12278	99.3179	70.0556	75.8464	99.5098
SRF	19 weeks	M	Mix	090515.SRF	mRC-seq	450	88001145	47710916	29.5537	11.1048	99.0476	55.8774	25.6008	100	73.6486	67.7684	99.0415
				300315.SRF.WGS	WGS	450	181685129	147012067	18.8993	4.57959	98.6395	13.4714	5.32834	99.0463	24.2684	25.353	98.722
SREF15	40 weeks	F	Mix	090515.SREF15	mRC-seq	450	78604963	30280093	90.97	5.90272	100	27.8295	10.7694	99.8636	45.7173	45.2451	99.5098
				300315.SREF15.WGS	WGS	450	121687280	60221006	50.2933	1.55508	99.7139	7.54707	2.33561	97.8172	10.652	10.6667	99.183
SREF16	40 weeks	F	Mix	090515.SREF16	mRC-seq	450	72934924	42354761	57.5765	7.19742	99.8569	45.8158	10.161	100	88.183	86.567	99.5098
				300315.SREF16.WGS	WGS	450	126821262	50317904	16.8326	1.48641	99.8569	6.26467	2.0573	97.5443	8.83333	8.99183	99.5098
SREF17	40 weeks	F	Mix	090515.SREF17	mRC-seq	450	63383927	37938477	76.2103	5.8598	100	44.6753	11.2483	100	96.768	100.103	99.5098
				300315.SREF17.WGS	WGS	450	133184170	71233019	31.4864	2.39056	99.8569	10.528	3.49795	98.7722	19.183	21.469	99.3464
SREF18	40 weeks	F	Mix	090515.SREF18	mRC-seq	450	54357166	34808297	56.9442	6.64807	99.7139	40.1514	10.4311	99.8636	75.2908	79.8023	99.5098
				300315.SREF18.WGS	WGS	450	131937030	87863337	18.1917	2.3319	99.7139	8.22101	2.93452	98.7722	12.8807	13.9461	99.183
SREF19	40 weeks	M	Mix	090515.SREF19	mRC-seq	450	50075897	34908462	36.8109	7.18639	98.3673	39.703	11.5572	100	79.4313	79.7364	99.0415
				300315.SREF19.WGS	WGS	450	130913095	110448761	20.1088	3.13469	98.5034	14.2384	5.67575	99.0463	27.5559	28.024	98.722
SREF20	40 weeks	M	Mix	090515.SREF20	mRC-seq	450	59799397	40475146	53.5823	6.79864	98.6395	44.3842	11.1185	100	89.4361	92.8834	99.0415
				300315.SREF20.WGS	WGS	450	134266323	96733644	20.6231	2.61088	98.2313	8.79292	3.30245	99.0463	13.2556	14.762	98.4026
SREF21	40 weeks	M	Mix	090515.SREF21	mRC-seq	450	30025497	13017479	31.1959	1.96871	97.551	20.421	3.64033	98.9101	48.9776	51.5511	99.0415
				300315.SREF21.WGS	WGS	450	129199444	71305121	16.2599	2.39184	98.0952	7.90327	3.30109	98.6376	11.4409	11.5383	99.0415
SRCD10.SREF19.130	34 weeks	F	Tail	310715.SRCD10.SREF19.130	mRC-seq	450	9755033	4831559	5.75393	0.618026	87.5536	7.00955	1.53888	97.2715	14.0082	12.7614	98.2026
SRCD10.SREF19.131	34 weeks	F	Tail	310715.SRCD10.SREF19.131	mRC-seq	450	8793755	3504230	3.6495	0.493562	80.9728	4.87995	1.29195	92.7694	7.9951	7.77778	97.549
SRCD10.SREF19.132	34 weeks	F	Tail	310715.SRCD10.SREF19.132	mRC-seq	450	10253215	3023451	3.39771	0.290415	74.9642	4.16508	1.15962	82.2647	7.35621	6.53105	96.732
SRCD10.SREF19.133	34 weeks	F	Tail	310715.SRCD10.SREF19.133	mRC-seq	450	9417763	5098623	6.08155	0.726753	88.1259	7.84038	1.60573	97.1351	16.0114	14.6209	98.366
SRCD10.SREF19.134	34 weeks	M	Tail	310715.SRCD10.SREF19.134	mRC-seq	450	9575574	4171541	4.72789	0.623129	83.9456	5.89646	1.47684	96.1853	11.1182	9.60863	97.9233
SRCD10.SREF19.135	34 weeks	M	Tail	310715.SRCD10.SREF19.135	mRC-seq	450	8365405	2729951	3.12653	0.37415	73.8776	4.24114	0.968665	83.7875	6.95048	5.99042	96.9649
SRCD10.SREF19.136	34 weeks	M	Tail	310715.SRCD10.SREF19.136	mRC-seq	450	9437100	4816460	5.7932	0.744218	84.7619	7.73569	1.73569	96.7302	15.3035	13.7891	97.4441
SRCD10.SREF19.137	34 weeks	M	Tail	310715.SRCD10.SREF19.137	mRC-seq	450	10884732	5996711	7.97823	0.771429	86.5306	9.45504	1.87193	97.2752	19.9089	20.5527	98.4026
SRCD10.SREF19.138	34 weeks	M	Tail	310715.SRCD10.SREF19.138	mRC-seq	450	10467637	5928312	6.39864	0.87483	87.619	8.68529	1.84605	98.0926	17.8482	16.8706	98.5623
SRCD10.SREF19.139	34 weeks	M	Tail	310715.SRCD10.SREF19.139	mRC-seq	450	7769974	4007419	5.27075	0.552381	83.1293	6.42779	1.36921	94.9591	12.4361	12.1102	97.4441
SRCD10.SREF19.170	27 weeks	F	Tail	310715.SRCD10.SREF19.170	mRC-seq	450	10151593	5219306	6.66953	0.692418	87.2675	8.47203	1.81719	97.2715	16.1111	15.2859	98.8562
SRCD10.SREF19.171	27 weeks	F	Tail	310715.SRCD10.SREF19.171	mRC-seq	450	9521348	4840036	6.14163	0.732475	87.5536	7.22101	1.74898	96.4529	14.652	13.384	98.0392
SRCD10.SREF19.172	27 weeks	F	Tail	310715.SRCD10.SREF19.172	mRC-seq	450	11602876	6236935	7.00858	0.841202	90.1288	9.4352	2.21282	97.8172	18.2239	17.0474	99.183
SRCD10.SREF19.173	27 weeks	M	Tail	310715.SRCD10.SREF19.173	mRC-seq	450	11397469	4119669	4.08299	0.580952	81.9048	5.33106	1.51635	93.3243	9.32428	8.16933	97.9233
SRCD10.SREF19.174	27 weeks	M	Tail	310715.SRCD10.SREF19.174	mRC-seq	450	10015439	5240135	6.3102	0.695238	84.6259	8.01771	1.84469	96.8665	15.5958	14.6054	97.2843
SRCD11.SREF20.140	33 weeks	F	Tail	310715.SRCD10.SREF20.140	mRC-seq	450	11464974	5743044	6.58083	0.918455	87.4106	8.81992	2.30014	97.9536	16.4559	15.6977	98.366
SRCD11.SREF20.141	33 weeks	F	Tail	310715.SRCD10.SREF20.141	mRC-seq	450	9617842	4278490	4.84692	0.690987	84.9785	6.38881	1.75443	97.4079	10.4444	10.8971	97.549
SRCD11.SREF20.142	33 weeks	F	Tail	310715.SRCD10.SREF20.142	mRC-seq	450	9667281	5313061	6.93562	0.834049	86.9814	9.0382	1.93179	97.5443	16.3235	17.1977	98.366
SRCD11.SREF20.144	33 weeks	M	Tail	310715.SRCD10.SREF20.144	mRC-seq	450	10851141	4671467	5.16327	0.727891	84.0816	7.02861	1.83379	96.7302	11.3706	10.9089	97.2843
SRCD11.SREF20.145	33 weeks	M	Tail	310715.SRCD10.SREF20.145	mRC-seq	450	10032609	3877072	3.81361	0.553741	80.8163	5.7139	1.49455	95.7766	8.74281	8.73323	96.6454
SRCD11.SREF20.146	33 weeks	M	Tail	310715.SRCD10.SREF20.146	mRC-seq	450	10711840	3499955	4.25442	0.340136	79.3197	4.63215	1.03678	89.9183	7.58626	7.88019	97.7636
SRCD11.SREF20.153	30 weeks	F	Tail	310715.SRCD10.SREF20.153	mRC-seq	450	11608409	5634263	6.76538	0.865522	86.8383	8.27831	1.95907	97.4079	14.951	15.1536	98.2026
SRCD11.SREF20.154	30 weeks	F	Tail	310715.SRCD10.SREF20.154	mRC-seq	450	8308378	3221758	3.85265	0.474964	78.2546	4.60573	1.21555	91.1323	7.9902	7.53922	97.549
SRCD11.SREF20.155	30 weeks	F	Tail	310715.SRCD10.SREF20.155	mRC-seq	450	10288146	4570562	5.9299	0.686695	86.9814	7.48022	2.00409	97.9536	13.6029	12.5605	98.6928
SRCD11.SREF20.156	30 weeks	F	Tail	310715.SRCD10.SREF20.156	mRC-seq	450	9062512	6591230	12.9485	0.979971	86.8383	15.2265	2.39427	97.5443	38.1454	38.0033	98.5294
SRCD11.SREF20.157	30 weeks	F	Tail	310715.SRCD10.SREF20.157	mRC-seq	450	10397427	5625386	10.186	0.608011	86.4092	9.41201	1.44748	95.3615	22.3905	22.585	98.2026
SRCD11.SREF20.158	30 weeks	F	Tail	310715.SRCD10.SREF20.158	mRC-seq	450	10593032	5020434	7.96423	0.690987	88.8412	8.72442	1.94407	97.6808	16.4673	16.0605	98.366
SRCD11.SREF20.159	30 weeks	M	Tail	310715.SRCD10.SREF20.159	mRC-seq	450	14117182	5222837	7.53605	0.831293	88.4354	9.29019	2.37193	96.7302	14.5112	13.4441	98.4026
SRCD11.SREF20.160	30 weeks	M	Tail	310715.SRCD10.SREF20.160	mRC-seq	450	9269446	4876892	6.82857	0.733333	84.4898	9.00681	1.8297	97.9564	15.5351	16.2428	97.4441
SRCD11.SREF20.184	28 weeks	F	Tail	310715.SRCD10.SREF20.184	mRC-seq	450	10777434	5757699	8.81402	0.83834	87.8398	10.1951	2.18008	98.2265	20.7533	20.152	98.366
SRCD11.SREF20.185	28 weeks	F	Tail	310715.SRCD10.SREF20.185	mRC-seq	450	10799797	4505313	4.74964	0.602289	85.1216	5.9427	1.44475	95.6344	9.67157	9.79085	98.6928
SRCD11.SREF20.188	24 weeks	F	Tail	310715.SRCD10.SREF20.188	mRC-seq	450	12234960	7115268	10.0672	1.13448	90.2718	12.6617	2.68895	98.4993	26.0098	25.9248	98.366
SRCD11.SREF20.189	24 weeks	F	Tail	310715.SRCD10.SREF20.189	mRC-seq	450	10634889	3179705	4.1774	0.492132	78.97	4.74625	1.4693	87.9945	7.06046	5.9902	97.549
SRCD11.SREF20.190	24 weeks	F	Tail	310715.SRCD10.SREF20.190	mRC-seq	450	9069300	4782586	7.20029	0.659514	86.4092	8.42701	1.73806	97.4079	17.183	16.3007	98.0392
SRCD11.SREF20.191	24 weeks	F	Tail	310715.SRCD10.SREF20.191	mRC-seq	450	10905166	3564164	3.85408	0.55794	82.6896	4.87722	1.63029	90.8595	6.64379	6.79412	97.3856
SRCD11.SREF20.192	24 weeks	F	Tail	310715.SRCD10.SREF20.192	mRC-seq	450	10567583	4317362	4.57082	0.589413	85.2647	5.809	1.60846	96.3165	9.44281	8.82026	97.549
SRCD11.SREF20.193	24 weeks	M	Tail	310715.SRCD10.SREF20.193	mRC-seq	450	13176666	5136070	5.42041	0.816327	84.898	7.15668	1.97275	96.8665	10.7588	10.5	98.2428
SRCD11.SREF20.194	24 weeks	M	Tail	310715.SRCD10.SREF20.194	mRC-seq	450	20130921	13723768	25.7293	1.87483	93.6054	30.3597	4.50545	98.5014	75.0527	75.1054	98.722
SRCD12.SREF21.35	50 weeks	F	Tail	310715.SRCD12.SREF21.35	mRC-seq	450	9991116	4399313	5.17454	0.593705	85.98	6.59482	1.55798	95.0887	12.1781	10.9951	98.0392
SRCD12.SREF21.36	50 weeks	F	Tail	310715.SRCD12.SREF21.36	mRC-seq	450	11068530	4831113	5.82546	0.702432	85.8369	7.22237	1.7708	96.9986	12.9444	11.9755	98.366
SRCD12.SREF21.127	35 weeks	F	Tail	310715.SRCD12.SREF21.127	mRC-seq	450	7211015	3743072	4.95994	0.553648	80.9728	5.94543	1.31378	95.6344	11.5768	11.1356	97.0588
SRCD12.SREF21.128	35 weeks	F	Tail	310715.SRCD12.SREF21.128	mRC-seq	450	11790103	5790206	6.70672	0.88269	91.5594	8.47749	2.08186	97.9536	16.5768	15.7288	99.183
SRCD12.SREF21.129	35 weeks	M	Tail	310715.SRCD12.SREF21.129	mRC-seq	450	10166715	5130338	6.27211	0.680272	84.4898	7.68392	1.80245	97.0027	15.1054	14.1741	97.9233
SRCD12.SREF21.166	28 weeks	F	Tail	310715.SRCD12.SREF21.166	mRC-seq	450	12060528	4771381	5.65808	0.722461	86.123	6.56071	1.74488	95.3615	11.8611	11.0556	98.366
SRCD12.SREF21.167	28 weeks	F	Tail	310715.SRCD12.SREF21.167	mRC-seq	450	12813151	4859892	6.00429	0.682403	89.1273	7.28649	2.02046	96.0437	12.0196	10.4444	98.0392
SRCD12.SREF21.168	28 weeks	F	Tail	310715.SRCD12.SREF21.168	mRC-seq	450	9648539	4869346	6.71388	0.739628	86.2661	7.38063	1.68895	96.9986	15.3268	13.9902	97.2222
SRCD12.SREF21.169	28 weeks	M	Tail	310715.SRCD12.SREF21.169	mRC-seq	450	10197440	4611284	5.92109	0.578231	83.5374	7.25204	1.71935	96.7302	13.6422	12.6358	97.9233
								Average	26.2655	3.00022	92.7791	23.6602	5.69509	97.8016	49.9819	50.3019	98.6709

## Sheet: sequencing pools
Pool Name	# of Libraries	Library IDs	MiSeq	HiSeq
AB Parental pool	2	SRA and SRB (somatic mix)	1 MiSeq run (2x300)	combined with AB F1 pool 1, 1 Flow Cell, 2x150
AB F1 pool 1	6	SRAB 2,3,5,6,7,8 (somatic mix)	3 MiSeq runs (2x250)	combined with AB Parental pool, 1 FC, 2x150
AB F1 pool 2	7	SRAB 10,11,12,13,14,15,18 (embryo)	3 MiSeq runs (2x300)	combined with AB F1 pool 3, 1 FC, 2x150
AB F1 pool 3	8	SRAB 1,4,9,16,17,18,19,20 (somatic mix/embryo)	3 MiSeq runs (2x300)	combined with AB F1 pool 2, 1 FC, 2x 150
CDEF Parental pool	4	SRC, SRD, SRE, SRF (somatic mix)	3 MiSeq runs (2x300)	1 FC, 2x150
CDEF F1 somatic mix pool	12	SRCD 10-14; SREF 15-21 (somatic mix)	-	HiSeq 2500, 1 FC, 2x250
CDEF F1 tail pool	12	SRCD 10-14; SREF 15-22 (tail)	3 MiSeq runs (2x250)	1 FC, 2x150
F2 pool 1	23	F2 140-142; 144-146; 153-160; 184-185; 188-194 (tail)	-	HiSeq 2500, 1 FC, 2x250
F2 pool 2	24	F2 130-139; 170-174; 35-36; 127-129; 166-169 (tail)	-	HiSeq 2500, 1 FC, 2x250
SRA and SRE tissue pool	10	SRA and SRE liver, heart, brain, right ovary, left ovary	-	HiSeq 2500, 1 FC, 2x250
SRCD14 somatic	1	SRCD14 (somatic mix)	-	HiSeq 2500, 1 FC, 2x250
SRCD14 testes pool	2	SRCD14 right testicle, left testicle	-	HiSeq 2500, 2 FC, 2x250

## Sheet: mRC-seq probes
PROBE_SEQUENCE	PROBE_ID	SEQ_ID	POSITION	DESIGN_NOTE	PROBE_CLASS
AGCCGGGCGTGGTGGCGCACGCCTTTAATCCCAGCACTCGGGAGGCAGAGGCAGGCGGATTTCTGAGTTCGAGGC	B1:+:1	B1	1	probe_tm:88.68	experimental
GCCGGGCGTGGTGGCGCACGCCTTTAATCCCAGCACTCGGGAGGCAGAGGCAGGCGGATTTCTGAGTTCGAGGCCA	B1:+:2	B1	2	probe_tm:88.98	experimental
CCGGGCGTGGTGGCGCACGCCTTTAATCCCAGCACTCGGGAGGCAGAGGCAGGCGGATTTCTGAGTTCGAGGCCA	B1:+:3	B1	3	probe_tm:88.68	experimental
CGGGCGTGGTGGCGCACGCCTTTAATCCCAGCACTCGGGAGGCAGAGGCAGGCGGATTTCTGAGTTCGAGGCCAGC	B1:+:4	B1	4	probe_tm:88.98	experimental
GGGCGTGGTGGCGCACGCCTTTAATCCCAGCACTCGGGAGGCAGAGGCAGGCGGATTTCTGAGTTCGAGGCCAGCC	B1:+:5	B1	5	probe_tm:88.98	experimental
GGCGTGGTGGCGCACGCCTTTAATCCCAGCACTCGGGAGGCAGAGGCAGGCGGATTTCTGAGTTCGAGGCCAGCCTG	B1:+:6	B1	6	probe_tm:88.73	experimental
GCGTGGTGGCGCACGCCTTTAATCCCAGCACTCGGGAGGCAGAGGCAGGCGGATTTCTGAGTTCGAGGCCAGCCTGG	B1:+:7	B1	7	probe_tm:88.73	experimental
CGTGGTGGCGCACGCCTTTAATCCCAGCACTCGGGAGGCAGAGGCAGGCGGATTTCTGAGTTCGAGGCCAGCCTGG	B1:+:8	B1	8	probe_tm:88.44	experimental
GTGGTGGCGCACGCCTTTAATCCCAGCACTCGGGAGGCAGAGGCAGGCGGATTTCTGAGTTCGAGGCCAGCCTGGTC	B1:+:9	B1	9	probe_tm:88.20	experimental
TGGTGGCGCACGCCTTTAATCCCAGCACTCGGGAGGCAGAGGCAGGCGGATTTCTGAGTTCGAGGCCAGCCTGGTCTA	B1:+:10	B1	10	probe_tm:87.44	experimental
GGTGGCGCACGCCTTTAATCCCAGCACTCGGGAGGCAGAGGCAGGCGGATTTCTGAGTTCGAGGCCAGCCTGGTCTA	B1:+:11	B1	11	probe_tm:87.66	experimental
GTGGCGCACGCCTTTAATCCCAGCACTCGGGAGGCAGAGGCAGGCGGATTTCTGAGTTCGAGGCCAGCCTGGTCTACA	B1:+:12	B1	12	probe_tm:87.44	experimental
TGGCGCACGCCTTTAATCCCAGCACTCGGGAGGCAGAGGCAGGCGGATTTCTGAGTTCGAGGCCAGCCTGGTCTACAA	B1:+:13	B1	13	probe_tm:86.91	experimental
GGCGCACGCCTTTAATCCCAGCACTCGGGAGGCAGAGGCAGGCGGATTTCTGAGTTCGAGGCCAGCCTGGTCTACAA	B1:+:14	B1	14	probe_tm:87.13	experimental
GCGCACGCCTTTAATCCCAGCACTCGGGAGGCAGAGGCAGGCGGATTTCTGAGTTCGAGGCCAGCCTGGTCTACAAA	B1:+:15	B1	15	probe_tm:86.60	experimental
CGCACGCCTTTAATCCCAGCACTCGGGAGGCAGAGGCAGGCGGATTTCTGAGTTCGAGGCCAGCCTGGTCTACAAA	B1:+:16	B1	16	probe_tm:86.28	experimental
GCACGCCTTTAATCCCAGCACTCGGGAGGCAGAGGCAGGCGGATTTCTGAGTTCGAGGCCAGCCTGGTCTACAAAG	B1:+:17	B1	17	probe_tm:86.28	experimental
CACGCCTTTAATCCCAGCACTCGGGAGGCAGAGGCAGGCGGATTTCTGAGTTCGAGGCCAGCCTGGTCTACAAAG	B1:+:18	B1	18	probe_tm:85.95	experimental
ACGCCTTTAATCCCAGCACTCGGGAGGCAGAGGCAGGCGGATTTCTGAGTTCGAGGCCAGCCTGGTCTACAAAG	B1:+:19	B1	19	probe_tm:85.61	experimental
CGCCTTTAATCCCAGCACTCGGGAGGCAGAGGCAGGCGGATTTCTGAGTTCGAGGCCAGCCTGGTCTACAAAGTGA	B1:+:20	B1	20	probe_tm:85.74	experimental
GCCTTTAATCCCAGCACTCGGGAGGCAGAGGCAGGCGGATTTCTGAGTTCGAGGCCAGCCTGGTCTACAAAGTGAG	B1:+:21	B1	21	probe_tm:85.74	experimental
CCTTTAATCCCAGCACTCGGGAGGCAGAGGCAGGCGGATTTCTGAGTTCGAGGCCAGCCTGGTCTACAAAGTGAG	B1:+:22	B1	22	probe_tm:85.40	experimental
CTTTAATCCCAGCACTCGGGAGGCAGAGGCAGGCGGATTTCTGAGTTCGAGGCCAGCCTGGTCTACAAAGTGAGT	B1:+:23	B1	23	probe_tm:84.86	experimental
TTTAATCCCAGCACTCGGGAGGCAGAGGCAGGCGGATTTCTGAGTTCGAGGCCAGCCTGGTCTACAAAGTGAGTTC	B1:+:24	B1	24	probe_tm:84.66	experimental
TTAATCCCAGCACTCGGGAGGCAGAGGCAGGCGGATTTCTGAGTTCGAGGCCAGCCTGGTCTACAAAGTGAGTTCCA	B1:+:25	B1	25	probe_tm:85.00	experimental
TAATCCCAGCACTCGGGAGGCAGAGGCAGGCGGATTTCTGAGTTCGAGGCCAGCCTGGTCTACAAAGTGAGTTCCAG	B1:+:26	B1	26	probe_tm:85.53	experimental
AATCCCAGCACTCGGGAGGCAGAGGCAGGCGGATTTCTGAGTTCGAGGCCAGCCTGGTCTACAAAGTGAGTTCCAG	B1:+:27	B1	27	probe_tm:85.74	experimental
ATCCCAGCACTCGGGAGGCAGAGGCAGGCGGATTTCTGAGTTCGAGGCCAGCCTGGTCTACAAAGTGAGTTCCAGGA	B1:+:28	B1	28	probe_tm:86.07	experimental
TCCCAGCACTCGGGAGGCAGAGGCAGGCGGATTTCTGAGTTCGAGGCCAGCCTGGTCTACAAAGTGAGTTCCAGGACA	B1:+:29	B1	29	probe_tm:86.38	experimental
CCCAGCACTCGGGAGGCAGAGGCAGGCGGATTTCTGAGTTCGAGGCCAGCCTGGTCTACAAAGTGAGTTCCAGGACA	B1:+:30	B1	30	probe_tm:86.60	experimental
CCAGCACTCGGGAGGCAGAGGCAGGCGGATTTCTGAGTTCGAGGCCAGCCTGGTCTACAAAGTGAGTTCCAGGACAGC	B1:+:31	B1	31	probe_tm:86.91	experimental
CAGCACTCGGGAGGCAGAGGCAGGCGGATTTCTGAGTTCGAGGCCAGCCTGGTCTACAAAGTGAGTTCCAGGACAGCCA	B1:+:32	B1	32	probe_tm:86.69	experimental
AGCACTCGGGAGGCAGAGGCAGGCGGATTTCTGAGTTCGAGGCCAGCCTGGTCTACAAAGTGAGTTCCAGGACAGCCA	B1:+:33	B1	33	probe_tm:86.38	experimental
GCACTCGGGAGGCAGAGGCAGGCGGATTTCTGAGTTCGAGGCCAGCCTGGTCTACAAAGTGAGTTCCAGGACAGCCAG	B1:+:34	B1	34	probe_tm:86.91	experimental
CACTCGGGAGGCAGAGGCAGGCGGATTTCTGAGTTCGAGGCCAGCCTGGTCTACAAAGTGAGTTCCAGGACAGCCAG	B1:+:35	B1	35	probe_tm:86.60	experimental
ACTCGGGAGGCAGAGGCAGGCGGATTTCTGAGTTCGAGGCCAGCCTGGTCTACAAAGTGAGTTCCAGGACAGCCAG	B1:+:36	B1	36	probe_tm:86.28	experimental
CTCGGGAGGCAGAGGCAGGCGGATTTCTGAGTTCGAGGCCAGCCTGGTCTACAAAGTGAGTTCCAGGACAGCCAGG	B1:+:37	B1	37	probe_tm:86.82	experimental
TCGGGAGGCAGAGGCAGGCGGATTTCTGAGTTCGAGGCCAGCCTGGTCTACAAAGTGAGTTCCAGGACAGCCAGGGC	B1:+:38	B1	38	probe_tm:87.13	experimental
CGGGAGGCAGAGGCAGGCGGATTTCTGAGTTCGAGGCCAGCCTGGTCTACAAAGTGAGTTCCAGGACAGCCAGGGC	B1:+:39	B1	39	probe_tm:87.36	experimental
GGGAGGCAGAGGCAGGCGGATTTCTGAGTTCGAGGCCAGCCTGGTCTACAAAGTGAGTTCCAGGACAGCCAGGGCTA	B1:+:40	B1	40	probe_tm:86.60	experimental
ATTTCTGAGTTCGAGGCCAGCCTGGTCTACAAAGTGAGTTCCAGGACAGCCAGGGCTATACAGAGAAACCCTGTC	B1:+:59	B1	59	probe_tm:83.22	experimental
TTTCTGAGTTCGAGGCCAGCCTGGTCTACAAAGTGAGTTCCAGGACAGCCAGGGCTATACAGAGAAACCCTGTCTC	B1:+:60	B1	60	probe_tm:83.58	experimental
TTCTGAGTTCGAGGCCAGCCTGGTCTACAAAGTGAGTTCCAGGACAGCCAGGGCTATACAGAGAAACCCTGTCTCGA	B1:+:61	B1	61	probe_tm:83.94	experimental
TCTGAGTTCGAGGCCAGCCTGGTCTACAAAGTGAGTTCCAGGACAGCCAGGGCTATACAGAGAAACCCTGTCTCGAA	B1:+:62	B1	62	probe_tm:83.94	experimental
CTGAGTTCGAGGCCAGCCTGGTCTACAAAGTGAGTTCCAGGACAGCCAGGGCTATACAGAGAAACCCTGTCTCGAA	B1:+:63	B1	63	probe_tm:84.12	experimental
TGAGTTCGAGGCCAGCCTGGTCTACAAAGTGAGTTCCAGGACAGCCAGGGCTATACAGAGAAACCCTGTCTCGAAA	B1:+:64	B1	64	probe_tm:83.58	experimental
GAGTTCGAGGCCAGCCTGGTCTACAAAGTGAGTTCCAGGACAGCCAGGGCTATACAGAGAAACCCTGTCTCGAAA	B1:+:65	B1	65	probe_tm:83.76	experimental
AGTTCGAGGCCAGCCTGGTCTACAAAGTGAGTTCCAGGACAGCCAGGGCTATACAGAGAAACCCTGTCTCGAAA	B1:+:66	B1	66	probe_tm:83.40	experimental
GTTCGAGGCCAGCCTGGTCTACAAAGTGAGTTCCAGGACAGCCAGGGCTATACAGAGAAACCCTGTCTCGAAAA	B1:+:67	B1	67	probe_tm:83.40	experimental
TTCGAGGCCAGCCTGGTCTACAAAGTGAGTTCCAGGACAGCCAGGGCTATACAGAGAAACCCTGTCTCGAAAAA	B1:+:68	B1	68	probe_tm:82.84	experimental
TCGAGGCCAGCCTGGTCTACAAAGTGAGTTCCAGGACAGCCAGGGCTATACAGAGAAACCCTGTCTCGAAAAAA	B1:+:69	B1	69	probe_tm:82.84	experimental
CGAGGCCAGCCTGGTCTACAAAGTGAGTTCCAGGACAGCCAGGGCTATACAGAGAAACCCTGTCTCGAAAAAA	B1:+:70	B1	70	probe_tm:83.02	experimental
GAGGCCAGCCTGGTCTACAAAGTGAGTTCCAGGACAGCCAGGGCTATACAGAGAAACCCTGTCTCGAAAAAACA	B1:+:71	B1	71	probe_tm:82.84	experimental
AGGCCAGCCTGGTCTACAAAGTGAGTTCCAGGACAGCCAGGGCTATACAGAGAAACCCTGTCTCGAAAAAACA	B1:+:72	B1	72	probe_tm:82.46	experimental
GGCCAGCCTGGTCTACAAAGTGAGTTCCAGGACAGCCAGGGCTATACAGAGAAACCCTGTCTCGAAAAAACAA	B1:+:73	B1	73	probe_tm:82.46	experimental
GCCAGCCTGGTCTACAAAGTGAGTTCCAGGACAGCCAGGGCTATACAGAGAAACCCTGTCTCGAAAAAACAAA	B1:+:74	B1	74	probe_tm:81.90	experimental
CCAGCCTGGTCTACAAAGTGAGTTCCAGGACAGCCAGGGCTATACAGAGAAACCCTGTCTCGAAAAAACAAA	B1:+:75	B1	75	probe_tm:81.49	experimental
CAGCCTGGTCTACAAAGTGAGTTCCAGGACAGCCAGGGCTATACAGAGAAACCCTGTCTCGAAAAAACAAAA	B1:+:76	B1	76	probe_tm:80.92	experimental
AGCCTGGTCTACAAAGTGAGTTCCAGGACAGCCAGGGCTATACAGAGAAACCCTGTCTCGAAAAAACAAAA	B1:+:77	B1	77	probe_tm:80.50	experimental
GCCTGGTCTACAAAGTGAGTTCCAGGACAGCCAGGGCTATACAGAGAAACCCTGTCTCGAAAAAACAAAA	B1:+:78	B1	78	probe_tm:80.65	experimental
CCTGGTCTACAAAGTGAGTTCCAGGACAGCCAGGGCTATACAGAGAAACCCTGTCTCGAAAAAACAAAA	B1:+:79	B1	79	probe_tm:80.22	experimental
CTGGTCTACAAAGTGAGTTCCAGGACAGCCAGGGCTATACAGAGAAACCCTGTCTCGAAAAAACAAAA	B1:+:80	B1	80	probe_tm:79.76	experimental
TGGTCTACAAAGTGAGTTCCAGGACAGCCAGGGCTATACAGAGAAACCCTGTCTCGAAAAAACAAAA	B1:+:81	B1	81	probe_tm:79.30	experimental
GGTCTACAAAGTGAGTTCCAGGACAGCCAGGGCTATACAGAGAAACCCTGTCTCGAAAAAACAAAA	B1:+:82	B1	82	probe_tm:79.44	experimental
GTCTACAAAGTGAGTTCCAGGACAGCCAGGGCTATACAGAGAAACCCTGTCTCGAAAAAACAAAA	B1:+:83	B1	83	probe_tm:78.96	experimental
TCTACAAAGTGAGTTCCAGGACAGCCAGGGCTATACAGAGAAACCCTGTCTCGAAAAAACAAAA	B1:+:84	B1	84	probe_tm:78.46	experimental
CTACAAAGTGAGTTCCAGGACAGCCAGGGCTATACAGAGAAACCCTGTCTCGAAAAAACAAAA	B1:+:85	B1	85	probe_tm:78.60	experimental
TACAAAGTGAGTTCCAGGACAGCCAGGGCTATACAGAGAAACCCTGTCTCGAAAAAACAAAA	B1:+:86	B1	86	probe_tm:78.07	experimental
ACAAAGTGAGTTCCAGGACAGCCAGGGCTATACAGAGAAACCCTGTCTCGAAAAAACAAAA	B1:+:87	B1	87	probe_tm:78.21	experimental
CAAAGTGAGTTCCAGGACAGCCAGGGCTATACAGAGAAACCCTGTCTCGAAAAAACAAAA	B1:+:88	B1	88	probe_tm:78.35	experimental
AAAGTGAGTTCCAGGACAGCCAGGGCTATACAGAGAAACCCTGTCTCGAAAAAACAAAA	B1:+:89	B1	89	probe_tm:77.80	experimental
AAGTGAGTTCCAGGACAGCCAGGGCTATACAGAGAAACCCTGTCTCGAAAAAACAAAA	B1:+:90	B1	90	probe_tm:77.93	experimental
AGTGAGTTCCAGGACAGCCAGGGCTATACAGAGAAACCCTGTCTCGAAAAAACAAAA	B1:+:91	B1	91	probe_tm:78.07	experimental
GTGAGTTCCAGGACAGCCAGGGCTATACAGAGAAACCCTGTCTCGAAAAAACAAAA	B1:+:92	B1	92	probe_tm:78.22	experimental
TGAGTTCCAGGACAGCCAGGGCTATACAGAGAAACCCTGTCTCGAAAAAACAAAA	B1:+:93	B1	93	probe_tm:77.62	experimental
GAGTTCCAGGACAGCCAGGGCTATACAGAGAAACCCTGTCTCGAAAAAACAAAA	B1:+:94	B1	94	probe_tm:77.77	experimental
AGTTCCAGGACAGCCAGGGCTATACAGAGAAACCCTGTCTCGAAAAAACAAAA	B1:+:95	B1	95	probe_tm:77.14	experimental
GTTCCAGGACAGCCAGGGCTATACAGAGAAACCCTGTCTCGAAAAAACAAAA	B1:+:96	B1	96	probe_tm:77.28	experimental
TTCCAGGACAGCCAGGGCTATACAGAGAAACCCTGTCTCGAAAAAACAAAA	B1:+:97	B1	97	probe_tm:76.62	experimental
TCCAGGACAGCCAGGGCTATACAGAGAAACCCTGTCTCGAAAAAACAAAA	B1:+:98	B1	98	probe_tm:76.76	experimental
GGGGCTGGTGAGATGGCTCAGTGGGTAAGAGCACCCGACTGCTCTTCCGAAGGTCCGGAGTTCAAATCCCAGCAA	B2:+:1	B2	1	probe_tm:85.95	experimental
GGGCTGGTGAGATGGCTCAGTGGGTAAGAGCACCCGACTGCTCTTCCGAAGGTCCGGAGTTCAAATCCCAGCAAC	B2:+:2	B2	2	probe_tm:85.95	experimental
GGCTGGTGAGATGGCTCAGTGGGTAAGAGCACCCGACTGCTCTTCCGAAGGTCCGGAGTTCAAATCCCAGCAACCA	B2:+:3	B2	3	probe_tm:85.74	experimental
GCTGGTGAGATGGCTCAGTGGGTAAGAGCACCCGACTGCTCTTCCGAAGGTCCGGAGTTCAAATCCCAGCAACCACA	B2:+:4	B2	4	probe_tm:85.53	experimental
CTGGTGAGATGGCTCAGTGGGTAAGAGCACCCGACTGCTCTTCCGAAGGTCCGGAGTTCAAATCCCAGCAACCACA	B2:+:5	B2	5	probe_tm:85.20	experimental
TGGTGAGATGGCTCAGTGGGTAAGAGCACCCGACTGCTCTTCCGAAGGTCCGGAGTTCAAATCCCAGCAACCACATG	B2:+:6	B2	6	probe_tm:85.00	experimental
GGTGAGATGGCTCAGTGGGTAAGAGCACCCGACTGCTCTTCCGAAGGTCCGGAGTTCAAATCCCAGCAACCACATG	B2:+:7	B2	7	probe_tm:85.20	experimental
GTGAGATGGCTCAGTGGGTAAGAGCACCCGACTGCTCTTCCGAAGGTCCGGAGTTCAAATCCCAGCAACCACATGG	B2:+:8	B2	8	probe_tm:85.20	experimental
TGAGATGGCTCAGTGGGTAAGAGCACCCGACTGCTCTTCCGAAGGTCCGGAGTTCAAATCCCAGCAACCACATGGTG	B2:+:9	B2	9	probe_tm:85.00	experimental
GAGATGGCTCAGTGGGTAAGAGCACCCGACTGCTCTTCCGAAGGTCCGGAGTTCAAATCCCAGCAACCACATGGTG	B2:+:10	B2	10	probe_tm:85.20	experimental
AGATGGCTCAGTGGGTAAGAGCACCCGACTGCTCTTCCGAAGGTCCGGAGTTCAAATCCCAGCAACCACATGGTG	B2:+:11	B2	11	probe_tm:84.86	experimental
GATGGCTCAGTGGGTAAGAGCACCCGACTGCTCTTCCGAAGGTCCGGAGTTCAAATCCCAGCAACCACATGGTGGC	B2:+:12	B2	12	probe_tm:85.74	experimental
ATGGCTCAGTGGGTAAGAGCACCCGACTGCTCTTCCGAAGGTCCGGAGTTCAAATCCCAGCAACCACATGGTGGC	B2:+:13	B2	13	probe_tm:85.40	experimental
TGGCTCAGTGGGTAAGAGCACCCGACTGCTCTTCCGAAGGTCCGGAGTTCAAATCCCAGCAACCACATGGTGGCTCA	B2:+:14	B2	14	probe_tm:85.53	experimental
GGCTCAGTGGGTAAGAGCACCCGACTGCTCTTCCGAAGGTCCGGAGTTCAAATCCCAGCAACCACATGGTGGCTCA	B2:+:15	B2	15	probe_tm:85.74	experimental
GCTCAGTGGGTAAGAGCACCCGACTGCTCTTCCGAAGGTCCGGAGTTCAAATCCCAGCAACCACATGGTGGCTCACA	B2:+:16	B2	16	probe_tm:85.53	experimental
CTCAGTGGGTAAGAGCACCCGACTGCTCTTCCGAAGGTCCGGAGTTCAAATCCCAGCAACCACATGGTGGCTCACA	B2:+:17	B2	17	probe_tm:85.20	experimental
TCAGTGGGTAAGAGCACCCGACTGCTCTTCCGAAGGTCCGGAGTTCAAATCCCAGCAACCACATGGTGGCTCACAA	B2:+:18	B2	18	probe_tm:84.66	experimental
CAGTGGGTAAGAGCACCCGACTGCTCTTCCGAAGGTCCGGAGTTCAAATCCCAGCAACCACATGGTGGCTCACAA	B2:+:19	B2	19	probe_tm:84.86	experimental
AGTGGGTAAGAGCACCCGACTGCTCTTCCGAAGGTCCGGAGTTCAAATCCCAGCAACCACATGGTGGCTCACAA	B2:+:20	B2	20	probe_tm:84.51	experimental
GTGGGTAAGAGCACCCGACTGCTCTTCCGAAGGTCCGGAGTTCAAATCCCAGCAACCACATGGTGGCTCACAAC	B2:+:21	B2	21	probe_tm:85.06	experimental
TGGGTAAGAGCACCCGACTGCTCTTCCGAAGGTCCGGAGTTCAAATCCCAGCAACCACATGGTGGCTCACAACCA	B2:+:22	B2	22	probe_tm:84.86	experimental
GGGTAAGAGCACCCGACTGCTCTTCCGAAGGTCCGGAGTTCAAATCCCAGCAACCACATGGTGGCTCACAACCA	B2:+:23	B2	23	probe_tm:85.06	experimental
GGTAAGAGCACCCGACTGCTCTTCCGAAGGTCCGGAGTTCAAATCCCAGCAACCACATGGTGGCTCACAACCATC	B2:+:24	B2	24	probe_tm:84.86	experimental
GTAAGAGCACCCGACTGCTCTTCCGAAGGTCCGGAGTTCAAATCCCAGCAACCACATGGTGGCTCACAACCATCC	B2:+:25	B2	25	probe_tm:84.86	experimental
TAAGAGCACCCGACTGCTCTTCCGAAGGTCCGGAGTTCAAATCCCAGCAACCACATGGTGGCTCACAACCATCCG	B2:+:26	B2	26	probe_tm:84.86	experimental
AAGAGCACCCGACTGCTCTTCCGAAGGTCCGGAGTTCAAATCCCAGCAACCACATGGTGGCTCACAACCATCCG	B2:+:27	B2	27	probe_tm:85.06	experimental
AGAGCACCCGACTGCTCTTCCGAAGGTCCGGAGTTCAAATCCCAGCAACCACATGGTGGCTCACAACCATCCGTA	B2:+:28	B2	28	probe_tm:84.86	experimental
GAGCACCCGACTGCTCTTCCGAAGGTCCGGAGTTCAAATCCCAGCAACCACATGGTGGCTCACAACCATCCGTAA	B2:+:29	B2	29	probe_tm:84.86	experimental
AGCACCCGACTGCTCTTCCGAAGGTCCGGAGTTCAAATCCCAGCAACCACATGGTGGCTCACAACCATCCGTAA	B2:+:30	B2	30	probe_tm:84.51	experimental
GCACCCGACTGCTCTTCCGAAGGTCCGGAGTTCAAATCCCAGCAACCACATGGTGGCTCACAACCATCCGTAAC	B2:+:31	B2	31	probe_tm:85.06	experimental
CACCCGACTGCTCTTCCGAAGGTCCGGAGTTCAAATCCCAGCAACCACATGGTGGCTCACAACCATCCGTAAC	B2:+:32	B2	32	probe_tm:84.71	experimental
ACCCGACTGCTCTTCCGAAGGTCCGGAGTTCAAATCCCAGCAACCACATGGTGGCTCACAACCATCCGTAAC	B2:+:33	B2	33	probe_tm:84.34	experimental
CCCGACTGCTCTTCCGAAGGTCCGGAGTTCAAATCCCAGCAACCACATGGTGGCTCACAACCATCCGTAACGA	B2:+:34	B2	34	probe_tm:84.71	experimental
CCGACTGCTCTTCCGAAGGTCCGGAGTTCAAATCCCAGCAACCACATGGTGGCTCACAACCATCCGTAACGAGA	B2:+:35	B2	35	probe_tm:84.51	experimental
CGACTGCTCTTCCGAAGGTCCGGAGTTCAAATCCCAGCAACCACATGGTGGCTCACAACCATCCGTAACGAGATC	B2:+:36	B2	36	probe_tm:84.31	experimental
GACTGCTCTTCCGAAGGTCCGGAGTTCAAATCCCAGCAACCACATGGTGGCTCACAACCATCCGTAACGAGATCTGA	B2:+:37	B2	37	probe_tm:83.94	experimental
ACTGCTCTTCCGAAGGTCCGGAGTTCAAATCCCAGCAACCACATGGTGGCTCACAACCATCCGTAACGAGATCTGA	B2:+:38	B2	38	probe_tm:83.58	experimental
CTGCTCTTCCGAAGGTCCGGAGTTCAAATCCCAGCAACCACATGGTGGCTCACAACCATCCGTAACGAGATCTGAC	B2:+:39	B2	39	probe_tm:84.12	experimental
TGCTCTTCCGAAGGTCCGGAGTTCAAATCCCAGCAACCACATGGTGGCTCACAACCATCCGTAACGAGATCTGACTC	B2:+:40	B2	40	probe_tm:83.94	experimental
GAGATCTGACTCCCTCTTCTGGAGTGTCTGAAGACAGCTACAGTGTACTTACATATAATAAATAAATAAATCTTTAA	B2:+:105	B2	105	probe_tm:75.95	experimental
AGATCTGACTCCCTCTTCTGGAGTGTCTGAAGACAGCTACAGTGTACTTACATATAATAAATAAATAAATCTTTAA	B2:+:106	B2	106	probe_tm:75.49	experimental
GATCTGACTCCCTCTTCTGGAGTGTCTGAAGACAGCTACAGTGTACTTACATATAATAAATAAATAAATCTTTAAA	B2:+:107	B2	107	probe_tm:75.49	experimental
ATCTGACTCCCTCTTCTGGAGTGTCTGAAGACAGCTACAGTGTACTTACATATAATAAATAAATAAATCTTTAAA	B2:+:108	B2	108	probe_tm:75.02	experimental
TCTGACTCCCTCTTCTGGAGTGTCTGAAGACAGCTACAGTGTACTTACATATAATAAATAAATAAATCTTTAAAA	B2:+:109	B2	109	probe_tm:75.02	experimental
CTGACTCCCTCTTCTGGAGTGTCTGAAGACAGCTACAGTGTACTTACATATAATAAATAAATAAATCTTTAAAA	B2:+:110	B2	110	probe_tm:75.09	experimental
TGACTCCCTCTTCTGGAGTGTCTGAAGACAGCTACAGTGTACTTACATATAATAAATAAATAAATCTTTAAAAA	B2:+:111	B2	111	probe_tm:74.53	experimental
GACTCCCTCTTCTGGAGTGTCTGAAGACAGCTACAGTGTACTTACATATAATAAATAAATAAATCTTTAAAAA	B2:+:112	B2	112	probe_tm:74.60	experimental
ACTCCCTCTTCTGGAGTGTCTGAAGACAGCTACAGTGTACTTACATATAATAAATAAATAAATCTTTAAAAA	B2:+:113	B2	113	probe_tm:74.09	experimental
CTCCCTCTTCTGGAGTGTCTGAAGACAGCTACAGTGTACTTACATATAATAAATAAATAAATCTTTAAAAAA	B2:+:114	B2	114	probe_tm:74.09	experimental
TCCCTCTTCTGGAGTGTCTGAAGACAGCTACAGTGTACTTACATATAATAAATAAATAAATCTTTAAAAAAA	B2:+:115	B2	115	probe_tm:73.52	experimental
CCCTCTTCTGGAGTGTCTGAAGACAGCTACAGTGTACTTACATATAATAAATAAATAAATCTTTAAAAAAA	B2:+:116	B2	116	probe_tm:73.57	experimental
CCTCTTCTGGAGTGTCTGAAGACAGCTACAGTGTACTTACATATAATAAATAAATAAATCTTTAAAAAAAA	B2:+:117	B2	117	probe_tm:73.00	experimental
CTCTTCTGGAGTGTCTGAAGACAGCTACAGTGTACTTACATATAATAAATAAATAAATCTTTAAAAAAAAA	B2:+:118	B2	118	probe_tm:72.42	experimental
TCTTCTGGAGTGTCTGAAGACAGCTACAGTGTACTTACATATAATAAATAAATAAATCTTTAAAAAAAAAA	B2:+:119	B2	119	probe_tm:71.84	experimental
CTTCTGGAGTGTCTGAAGACAGCTACAGTGTACTTACATATAATAAATAAATAAATCTTTAAAAAAAAAA	B2:+:120	B2	120	probe_tm:71.87	experimental
TTCTGGAGTGTCTGAAGACAGCTACAGTGTACTTACATATAATAAATAAATAAATCTTTAAAAAAAAAAA	B2:+:121	B2	121	probe_tm:71.28	experimental
TCTGGAGTGTCTGAAGACAGCTACAGTGTACTTACATATAATAAATAAATAAATCTTTAAAAAAAAAAAA	B2:+:122	B2	122	probe_tm:71.28	experimental
CTGGAGTGTCTGAAGACAGCTACAGTGTACTTACATATAATAAATAAATAAATCTTTAAAAAAAAAAAA	B2:+:123	B2	123	probe_tm:71.30	experimental
TGGAGTGTCTGAAGACAGCTACAGTGTACTTACATATAATAAATAAATAAATCTTTAAAAAAAAAAAAA	B2:+:124	B2	124	probe_tm:70.71	experimental
GGAGTGTCTGAAGACAGCTACAGTGTACTTACATATAATAAATAAATAAATCTTTAAAAAAAAAAAAA	B2:+:125	B2	125	probe_tm:70.72	experimental
GAGTGTCTGAAGACAGCTACAGTGTACTTACATATAATAAATAAATAAATCTTTAAAAAAAAAAAAAA	B2:+:126	B2	126	probe_tm:70.12	experimental
AGTGTCTGAAGACAGCTACAGTGTACTTACATATAATAAATAAATAAATCTTTAAAAAAAAAAAAAA	B2:+:127	B2	127	probe_tm:69.51	experimental
GTGTCTGAAGACAGCTACAGTGTACTTACATATAATAAATAAATAAATCTTTAAAAAAAAAAAAAA	B2:+:128	B2	128	probe_tm:69.50	experimental
TGTCTGAAGACAGCTACAGTGTACTTACATATAATAAATAAATAAATCTTTAAAAAAAAAAAAAA	B2:+:129	B2	129	probe_tm:68.87	experimental
GTCTGAAGACAGCTACAGTGTACTTACATATAATAAATAAATAAATCTTTAAAAAAAAAAAAAA	B2:+:130	B2	130	probe_tm:68.85	experimental
TCTGAAGACAGCTACAGTGTACTTACATATAATAAATAAATAAATCTTTAAAAAAAAAAAAAA	B2:+:131	B2	131	probe_tm:68.18	experimental
CTGAAGACAGCTACAGTGTACTTACATATAATAAATAAATAAATCTTTAAAAAAAAAAAAAA	B2:+:132	B2	132	probe_tm:68.16	experimental
TGAAGACAGCTACAGTGTACTTACATATAATAAATAAATAAATCTTTAAAAAAAAAAAAAA	B2:+:133	B2	133	probe_tm:67.45	experimental
GAAGACAGCTACAGTGTACTTACATATAATAAATAAATAAATCTTTAAAAAAAAAAAAAA	B2:+:134	B2	134	probe_tm:67.41	experimental
AAGACAGCTACAGTGTACTTACATATAATAAATAAATAAATCTTTAAAAAAAAAAAAAA	B2:+:135	B2	135	probe_tm:66.68	experimental
AGACAGCTACAGTGTACTTACATATAATAAATAAATAAATCTTTAAAAAAAAAAAAAA	B2:+:136	B2	136	probe_tm:66.62	experimental
GACAGCTACAGTGTACTTACATATAATAAATAAATAAATCTTTAAAAAAAAAAAAAA	B2:+:137	B2	137	probe_tm:66.56	experimental
ACAGCTACAGTGTACTTACATATAATAAATAAATAAATCTTTAAAAAAAAAAAAAA	B2:+:138	B2	138	probe_tm:65.77	experimental
CAGCTACAGTGTACTTACATATAATAAATAAATAAATCTTTAAAAAAAAAAAAAA	B2:+:139	B2	139	probe_tm:65.70	experimental
AGCTACAGTGTACTTACATATAATAAATAAATAAATCTTTAAAAAAAAAAAAAA	B2:+:140	B2	140	probe_tm:64.86	experimental
GCTACAGTGTACTTACATATAATAAATAAATAAATCTTTAAAAAAAAAAAAAA	B2:+:141	B2	141	probe_tm:64.77	experimental
CTACAGTGTACTTACATATAATAAATAAATAAATCTTTAAAAAAAAAAAAAA	B2:+:142	B2	142	probe_tm:63.88	experimental
TACAGTGTACTTACATATAATAAATAAATAAATCTTTAAAAAAAAAAAAAA	B2:+:143	B2	143	probe_tm:62.96	experimental
ACAGTGTACTTACATATAATAAATAAATAAATCTTTAAAAAAAAAAAAAA	B2:+:144	B2	144	probe_tm:62.82	experimental
TGTAGTCTCCCCTCCCCTAGCCTGAAACCTGCTTGCTCAGGGGTGGAGCTTCCTGCTCATTCGTTCTGCCACGCCCA	Etn_LTR:+:1	Etn_LTR	1	probe_tm:86.60	experimental
GTAGTCTCCCCTCCCCTAGCCTGAAACCTGCTTGCTCAGGGGTGGAGCTTCCTGCTCATTCGTTCTGCCACGCCCA	Etn_LTR:+:2	Etn_LTR	2	probe_tm:86.82	experimental
TAGTCTCCCCTCCCCTAGCCTGAAACCTGCTTGCTCAGGGGTGGAGCTTCCTGCTCATTCGTTCTGCCACGCCCAC	Etn_LTR:+:3	Etn_LTR	3	probe_tm:86.82	experimental
AGTCTCCCCTCCCCTAGCCTGAAACCTGCTTGCTCAGGGGTGGAGCTTCCTGCTCATTCGTTCTGCCACGCCCAC	Etn_LTR:+:4	Etn_LTR	4	probe_tm:87.04	experimental
GTCTCCCCTCCCCTAGCCTGAAACCTGCTTGCTCAGGGGTGGAGCTTCCTGCTCATTCGTTCTGCCACGCCCACTGC	Etn_LTR:+:5	Etn_LTR	5	probe_tm:87.66	experimental
TCTCCCCTCCCCTAGCCTGAAACCTGCTTGCTCAGGGGTGGAGCTTCCTGCTCATTCGTTCTGCCACGCCCACTGCTG	Etn_LTR:+:6	Etn_LTR	6	probe_tm:87.44	experimental
CTCCCCTCCCCTAGCCTGAAACCTGCTTGCTCAGGGGTGGAGCTTCCTGCTCATTCGTTCTGCCACGCCCACTGCTG	Etn_LTR:+:7	Etn_LTR	7	probe_tm:87.66	experimental
TCCCCTCCCCTAGCCTGAAACCTGCTTGCTCAGGGGTGGAGCTTCCTGCTCATTCGTTCTGCCACGCCCACTGCTGGA	Etn_LTR:+:8	Etn_LTR	8	probe_tm:87.44	experimental
CCCCTCCCCTAGCCTGAAACCTGCTTGCTCAGGGGTGGAGCTTCCTGCTCATTCGTTCTGCCACGCCCACTGCTGGA	Etn_LTR:+:9	Etn_LTR	9	probe_tm:87.66	experimental
CCCTCCCCTAGCCTGAAACCTGCTTGCTCAGGGGTGGAGCTTCCTGCTCATTCGTTCTGCCACGCCCACTGCTGGAA	Etn_LTR:+:10	Etn_LTR	10	probe_tm:87.13	experimental
CCTCCCCTAGCCTGAAACCTGCTTGCTCAGGGGTGGAGCTTCCTGCTCATTCGTTCTGCCACGCCCACTGCTGGAAC	Etn_LTR:+:11	Etn_LTR	11	probe_tm:87.13	experimental
CTCCCCTAGCCTGAAACCTGCTTGCTCAGGGGTGGAGCTTCCTGCTCATTCGTTCTGCCACGCCCACTGCTGGAACC	Etn_LTR:+:12	Etn_LTR	12	probe_tm:87.13	experimental
TCCCCTAGCCTGAAACCTGCTTGCTCAGGGGTGGAGCTTCCTGCTCATTCGTTCTGCCACGCCCACTGCTGGAACCTGC	Etn_LTR:+:13	Etn_LTR	13	probe_tm:87.21	experimental
CCCCTAGCCTGAAACCTGCTTGCTCAGGGGTGGAGCTTCCTGCTCATTCGTTCTGCCACGCCCACTGCTGGAACCTGC	Etn_LTR:+:14	Etn_LTR	14	probe_tm:87.44	experimental
CCCTAGCCTGAAACCTGCTTGCTCAGGGGTGGAGCTTCCTGCTCATTCGTTCTGCCACGCCCACTGCTGGAACCTGCG	Etn_LTR:+:15	Etn_LTR	15	probe_tm:87.44	experimental
CCTAGCCTGAAACCTGCTTGCTCAGGGGTGGAGCTTCCTGCTCATTCGTTCTGCCACGCCCACTGCTGGAACCTGCGGA	Etn_LTR:+:16	Etn_LTR	16	probe_tm:87.21	experimental
CTAGCCTGAAACCTGCTTGCTCAGGGGTGGAGCTTCCTGCTCATTCGTTCTGCCACGCCCACTGCTGGAACCTGCGGAGC	Etn_LTR:+:17	Etn_LTR	17	probe_tm:87.51	experimental
TAGCCTGAAACCTGCTTGCTCAGGGGTGGAGCTTCCTGCTCATTCGTTCTGCCACGCCCACTGCTGGAACCTGCGGAGCCA	Etn_LTR:+:18	Etn_LTR	18	probe_tm:87.29	experimental
AGCCTGAAACCTGCTTGCTCAGGGGTGGAGCTTCCTGCTCATTCGTTCTGCCACGCCCACTGCTGGAACCTGCGGAGCCA	Etn_LTR:+:19	Etn_LTR	19	probe_tm:87.51	experimental
GCCTGAAACCTGCTTGCTCAGGGGTGGAGCTTCCTGCTCATTCGTTCTGCCACGCCCACTGCTGGAACCTGCGGAGCCACA	Etn_LTR:+:20	Etn_LTR	20	probe_tm:87.80	experimental
CCTGAAACCTGCTTGCTCAGGGGTGGAGCTTCCTGCTCATTCGTTCTGCCACGCCCACTGCTGGAACCTGCGGAGCCACA	Etn_LTR:+:21	Etn_LTR	21	probe_tm:87.51	experimental
CTGAAACCTGCTTGCTCAGGGGTGGAGCTTCCTGCTCATTCGTTCTGCCACGCCCACTGCTGGAACCTGCGGAGCCACACA	Etn_LTR:+:22	Etn_LTR	22	probe_tm:87.29	experimental
TGAAACCTGCTTGCTCAGGGGTGGAGCTTCCTGCTCATTCGTTCTGCCACGCCCACTGCTGGAACCTGCGGAGCCACACAC	Etn_LTR:+:23	Etn_LTR	23	probe_tm:87.29	experimental
GAAACCTGCTTGCTCAGGGGTGGAGCTTCCTGCTCATTCGTTCTGCCACGCCCACTGCTGGAACCTGCGGAGCCACACAC	Etn_LTR:+:24	Etn_LTR	24	probe_tm:87.51	experimental
AAACCTGCTTGCTCAGGGGTGGAGCTTCCTGCTCATTCGTTCTGCCACGCCCACTGCTGGAACCTGCGGAGCCACACAC	Etn_LTR:+:25	Etn_LTR	25	probe_tm:87.21	experimental
AACCTGCTTGCTCAGGGGTGGAGCTTCCTGCTCATTCGTTCTGCCACGCCCACTGCTGGAACCTGCGGAGCCACACACG	Etn_LTR:+:26	Etn_LTR	26	probe_tm:87.73	experimental
ACCTGCTTGCTCAGGGGTGGAGCTTCCTGCTCATTCGTTCTGCCACGCCCACTGCTGGAACCTGCGGAGCCACACACGTGCA	Etn_LTR:+:27	Etn_LTR	27	probe_tm:88.08	experimental
CCTGCTTGCTCAGGGGTGGAGCTTCCTGCTCATTCGTTCTGCCACGCCCACTGCTGGAACCTGCGGAGCCACACACGTGCAC	Etn_LTR:+:28	Etn_LTR	28	probe_tm:88.58	experimental
CTGCTTGCTCAGGGGTGGAGCTTCCTGCTCATTCGTTCTGCCACGCCCACTGCTGGAACCTGCGGAGCCACACACGTGCACC	Etn_LTR:+:29	Etn_LTR	29	probe_tm:88.58	experimental
TGCTTGCTCAGGGGTGGAGCTTCCTGCTCATTCGTTCTGCCACGCCCACTGCTGGAACCTGCGGAGCCACACACGTGCACCT	Etn_LTR:+:30	Etn_LTR	30	probe_tm:88.08	experimental
GCTTGCTCAGGGGTGGAGCTTCCTGCTCATTCGTTCTGCCACGCCCACTGCTGGAACCTGCGGAGCCACACACGTGCACCT	Etn_LTR:+:31	Etn_LTR	31	probe_tm:88.30	experimental
CTTGCTCAGGGGTGGAGCTTCCTGCTCATTCGTTCTGCCACGCCCACTGCTGGAACCTGCGGAGCCACACACGTGCACCT	Etn_LTR:+:32	Etn_LTR	32	probe_tm:88.02	experimental
TTGCTCAGGGGTGGAGCTTCCTGCTCATTCGTTCTGCCACGCCCACTGCTGGAACCTGCGGAGCCACACACGTGCACCTT	Etn_LTR:+:33	Etn_LTR	33	probe_tm:87.51	experimental
TGCTCAGGGGTGGAGCTTCCTGCTCATTCGTTCTGCCACGCCCACTGCTGGAACCTGCGGAGCCACACACGTGCACCTTTC	Etn_LTR:+:34	Etn_LTR	34	probe_tm:87.80	experimental
GCTCAGGGGTGGAGCTTCCTGCTCATTCGTTCTGCCACGCCCACTGCTGGAACCTGCGGAGCCACACACGTGCACCTTTC	Etn_LTR:+:35	Etn_LTR	35	probe_tm:88.02	experimental
CTCAGGGGTGGAGCTTCCTGCTCATTCGTTCTGCCACGCCCACTGCTGGAACCTGCGGAGCCACACACGTGCACCTTTC	Etn_LTR:+:36	Etn_LTR	36	probe_tm:87.73	experimental
TCAGGGGTGGAGCTTCCTGCTCATTCGTTCTGCCACGCCCACTGCTGGAACCTGCGGAGCCACACACGTGCACCTTTCTA	Etn_LTR:+:37	Etn_LTR	37	probe_tm:87.00	experimental
CAGGGGTGGAGCTTCCTGCTCATTCGTTCTGCCACGCCCACTGCTGGAACCTGCGGAGCCACACACGTGCACCTTTCTA	Etn_LTR:+:38	Etn_LTR	38	probe_tm:87.21	experimental
AGGGGTGGAGCTTCCTGCTCATTCGTTCTGCCACGCCCACTGCTGGAACCTGCGGAGCCACACACGTGCACCTTTCTA	Etn_LTR:+:39	Etn_LTR	39	probe_tm:86.91	experimental
GGGGTGGAGCTTCCTGCTCATTCGTTCTGCCACGCCCACTGCTGGAACCTGCGGAGCCACACACGTGCACCTTTCTAC	Etn_LTR:+:40	Etn_LTR	40	probe_tm:87.44	experimental
TCGCCACCTAGCCCCTCTTCTCTTCCAGGTTTCCAAAATGCCTTTTCAGGCTAGAACCCAGGTTGTGGTC	Etn_LTR:+:235	Etn_LTR	235	probe_tm:83.00	experimental
CGCCACCTAGCCCCTCTTCTCTTCCAGGTTTCCAAAATGCCTTTTCAGGCTAGAACCCAGGTTGTGGTC	Etn_LTR:+:236	Etn_LTR	236	probe_tm:83.19	experimental
GCCACCTAGCCCCTCTTCTCTTCCAGGTTTCCAAAATGCCTTTTCAGGCTAGAACCCAGGTTGTGGTCTGC	Etn_LTR:+:237	Etn_LTR	237	probe_tm:83.39	experimental
CCACCTAGCCCCTCTTCTCTTCCAGGTTTCCAAAATGCCTTTTCAGGCTAGAACCCAGGTTGTGGTCTGC	Etn_LTR:+:238	Etn_LTR	238	probe_tm:83.00	experimental
CACCTAGCCCCTCTTCTCTTCCAGGTTTCCAAAATGCCTTTTCAGGCTAGAACCCAGGTTGTGGTCTGCTG	Etn_LTR:+:239	Etn_LTR	239	probe_tm:82.81	experimental
ACCTAGCCCCTCTTCTCTTCCAGGTTTCCAAAATGCCTTTTCAGGCTAGAACCCAGGTTGTGGTCTGCTG	Etn_LTR:+:240	Etn_LTR	240	probe_tm:82.41	experimental
CCTAGCCCCTCTTCTCTTCCAGGTTTCCAAAATGCCTTTTCAGGCTAGAACCCAGGTTGTGGTCTGCTGGC	Etn_LTR:+:241	Etn_LTR	241	probe_tm:83.39	experimental
CTAGCCCCTCTTCTCTTCCAGGTTTCCAAAATGCCTTTTCAGGCTAGAACCCAGGTTGTGGTCTGCTGGCCA	Etn_LTR:+:242	Etn_LTR	242	probe_tm:83.20	experimental
TAGCCCCTCTTCTCTTCCAGGTTTCCAAAATGCCTTTTCAGGCTAGAACCCAGGTTGTGGTCTGCTGGCCAGA	Etn_LTR:+:243	Etn_LTR	243	probe_tm:83.02	experimental
AGCCCCTCTTCTCTTCCAGGTTTCCAAAATGCCTTTTCAGGCTAGAACCCAGGTTGTGGTCTGCTGGCCAGA	Etn_LTR:+:244	Etn_LTR	244	probe_tm:83.20	experimental
GCCCCTCTTCTCTTCCAGGTTTCCAAAATGCCTTTTCAGGCTAGAACCCAGGTTGTGGTCTGCTGGCCAGACA	Etn_LTR:+:245	Etn_LTR	245	probe_tm:83.58	experimental
CCCCTCTTCTCTTCCAGGTTTCCAAAATGCCTTTTCAGGCTAGAACCCAGGTTGTGGTCTGCTGGCCAGACA	Etn_LTR:+:246	Etn_LTR	246	probe_tm:83.20	experimental
CCCTCTTCTCTTCCAGGTTTCCAAAATGCCTTTTCAGGCTAGAACCCAGGTTGTGGTCTGCTGGCCAGACACA	Etn_LTR:+:247	Etn_LTR	247	probe_tm:83.02	experimental
CCTCTTCTCTTCCAGGTTTCCAAAATGCCTTTTCAGGCTAGAACCCAGGTTGTGGTCTGCTGGCCAGACACAA	Etn_LTR:+:248	Etn_LTR	248	probe_tm:82.46	experimental
CTCTTCTCTTCCAGGTTTCCAAAATGCCTTTTCAGGCTAGAACCCAGGTTGTGGTCTGCTGGCCAGACACAACA	Etn_LTR:+:249	Etn_LTR	249	probe_tm:82.29	experimental
TCTTCTCTTCCAGGTTTCCAAAATGCCTTTTCAGGCTAGAACCCAGGTTGTGGTCTGCTGGCCAGACACAACAA	Etn_LTR:+:250	Etn_LTR	250	probe_tm:81.73	experimental
CTTCTCTTCCAGGTTTCCAAAATGCCTTTTCAGGCTAGAACCCAGGTTGTGGTCTGCTGGCCAGACACAACAA	Etn_LTR:+:251	Etn_LTR	251	probe_tm:81.90	experimental
TTCTCTTCCAGGTTTCCAAAATGCCTTTTCAGGCTAGAACCCAGGTTGTGGTCTGCTGGCCAGACACAACAA	Etn_LTR:+:252	Etn_LTR	252	probe_tm:81.49	experimental
TCTCTTCCAGGTTTCCAAAATGCCTTTTCAGGCTAGAACCCAGGTTGTGGTCTGCTGGCCAGACACAACAA	Etn_LTR:+:253	Etn_LTR	253	probe_tm:81.66	experimental
CTCTTCCAGGTTTCCAAAATGCCTTTTCAGGCTAGAACCCAGGTTGTGGTCTGCTGGCCAGACACAACAA	Etn_LTR:+:254	Etn_LTR	254	probe_tm:81.83	experimental
TCTTCCAGGTTTCCAAAATGCCTTTTCAGGCTAGAACCCAGGTTGTGGTCTGCTGGCCAGACACAACAA	Etn_LTR:+:255	Etn_LTR	255	probe_tm:81.40	experimental
CTTCCAGGTTTCCAAAATGCCTTTTCAGGCTAGAACCCAGGTTGTGGTCTGCTGGCCAGACACAACAA	Etn_LTR:+:256	Etn_LTR	256	probe_tm:81.57	experimental
TTCCAGGTTTCCAAAATGCCTTTTCAGGCTAGAACCCAGGTTGTGGTCTGCTGGCCAGACACAACAA	Etn_LTR:+:257	Etn_LTR	257	probe_tm:81.14	experimental
TCCAGGTTTCCAAAATGCCTTTTCAGGCTAGAACCCAGGTTGTGGTCTGCTGGCCAGACACAACAA	Etn_LTR:+:258	Etn_LTR	258	probe_tm:81.31	experimental
CCAGGTTTCCAAAATGCCTTTTCAGGCTAGAACCCAGGTTGTGGTCTGCTGGCCAGACACAACAA	Etn_LTR:+:259	Etn_LTR	259	probe_tm:81.48	experimental
CAGGTTTCCAAAATGCCTTTTCAGGCTAGAACCCAGGTTGTGGTCTGCTGGCCAGACACAACAA	Etn_LTR:+:260	Etn_LTR	260	probe_tm:81.02	experimental
AGGTTTCCAAAATGCCTTTTCAGGCTAGAACCCAGGTTGTGGTCTGCTGGCCAGACACAACAA	Etn_LTR:+:261	Etn_LTR	261	probe_tm:80.55	experimental
GGTTTCCAAAATGCCTTTTCAGGCTAGAACCCAGGTTGTGGTCTGCTGGCCAGACACAACAA	Etn_LTR:+:262	Etn_LTR	262	probe_tm:80.72	experimental
GTTTCCAAAATGCCTTTTCAGGCTAGAACCCAGGTTGTGGTCTGCTGGCCAGACACAACAA	Etn_LTR:+:263	Etn_LTR	263	probe_tm:80.22	experimental
TTTCCAAAATGCCTTTTCAGGCTAGAACCCAGGTTGTGGTCTGCTGGCCAGACACAACAA	Etn_LTR:+:264	Etn_LTR	264	probe_tm:79.71	experimental
TTCCAAAATGCCTTTTCAGGCTAGAACCCAGGTTGTGGTCTGCTGGCCAGACACAACAA	Etn_LTR:+:265	Etn_LTR	265	probe_tm:79.88	experimental
TCCAAAATGCCTTTTCAGGCTAGAACCCAGGTTGTGGTCTGCTGGCCAGACACAACAA	Etn_LTR:+:266	Etn_LTR	266	probe_tm:80.05	experimental
CCAAAATGCCTTTTCAGGCTAGAACCCAGGTTGTGGTCTGCTGGCCAGACACAACAA	Etn_LTR:+:267	Etn_LTR	267	probe_tm:80.23	experimental
CAAAATGCCTTTTCAGGCTAGAACCCAGGTTGTGGTCTGCTGGCCAGACACAACAA	Etn_LTR:+:268	Etn_LTR	268	probe_tm:79.68	experimental
AAAATGCCTTTTCAGGCTAGAACCCAGGTTGTGGTCTGCTGGCCAGACACAACAA	Etn_LTR:+:269	Etn_LTR	269	probe_tm:79.12	experimental
AAATGCCTTTTCAGGCTAGAACCCAGGTTGTGGTCTGCTGGCCAGACACAACAA	Etn_LTR:+:270	Etn_LTR	270	probe_tm:79.29	experimental
AATGCCTTTTCAGGCTAGAACCCAGGTTGTGGTCTGCTGGCCAGACACAACAA	Etn_LTR:+:271	Etn_LTR	271	probe_tm:79.46	experimental
ATGCCTTTTCAGGCTAGAACCCAGGTTGTGGTCTGCTGGCCAGACACAACAA	Etn_LTR:+:272	Etn_LTR	272	probe_tm:79.65	experimental
TGCCTTTTCAGGCTAGAACCCAGGTTGTGGTCTGCTGGCCAGACACAACAA	Etn_LTR:+:273	Etn_LTR	273	probe_tm:79.84	experimental
GCCTTTTCAGGCTAGAACCCAGGTTGTGGTCTGCTGGCCAGACACAACAA	Etn_LTR:+:274	Etn_LTR	274	probe_tm:80.04	experimental
TGTGGGAAGCCATTCCGGACTCCCTGGCCAGCCTGGACGGAAATCTGTGCCAGGCAGTAAACAAGCCCATATTTG	IAP_LTR:+:1	IAP_LTR	1	probe_tm:84.86	experimental
GTGGGAAGCCATTCCGGACTCCCTGGCCAGCCTGGACGGAAATCTGTGCCAGGCAGTAAACAAGCCCATATTTG	IAP_LTR:+:2	IAP_LTR	2	probe_tm:85.06	experimental
TGGGAAGCCATTCCGGACTCCCTGGCCAGCCTGGACGGAAATCTGTGCCAGGCAGTAAACAAGCCCATATTTGG	IAP_LTR:+:3	IAP_LTR	3	probe_tm:85.06	experimental
GGGAAGCCATTCCGGACTCCCTGGCCAGCCTGGACGGAAATCTGTGCCAGGCAGTAAACAAGCCCATATTTGG	IAP_LTR:+:4	IAP_LTR	4	probe_tm:85.27	experimental
GGAAGCCATTCCGGACTCCCTGGCCAGCCTGGACGGAAATCTGTGCCAGGCAGTAAACAAGCCCATATTTGGTG	IAP_LTR:+:5	IAP_LTR	5	probe_tm:85.06	experimental
GAAGCCATTCCGGACTCCCTGGCCAGCCTGGACGGAAATCTGTGCCAGGCAGTAAACAAGCCCATATTTGGTGGA	IAP_LTR:+:6	IAP_LTR	6	probe_tm:84.86	experimental
AAGCCATTCCGGACTCCCTGGCCAGCCTGGACGGAAATCTGTGCCAGGCAGTAAACAAGCCCATATTTGGTGGA	IAP_LTR:+:7	IAP_LTR	7	probe_tm:84.51	experimental
AGCCATTCCGGACTCCCTGGCCAGCCTGGACGGAAATCTGTGCCAGGCAGTAAACAAGCCCATATTTGGTGGATG	IAP_LTR:+:8	IAP_LTR	8	probe_tm:84.86	experimental
GCCATTCCGGACTCCCTGGCCAGCCTGGACGGAAATCTGTGCCAGGCAGTAAACAAGCCCATATTTGGTGGATGGC	IAP_LTR:+:9	IAP_LTR	9	probe_tm:85.74	experimental
CCATTCCGGACTCCCTGGCCAGCCTGGACGGAAATCTGTGCCAGGCAGTAAACAAGCCCATATTTGGTGGATGGC	IAP_LTR:+:10	IAP_LTR	10	probe_tm:85.40	experimental
CATTCCGGACTCCCTGGCCAGCCTGGACGGAAATCTGTGCCAGGCAGTAAACAAGCCCATATTTGGTGGATGGCTC	IAP_LTR:+:11	IAP_LTR	11	probe_tm:85.20	experimental
ATTCCGGACTCCCTGGCCAGCCTGGACGGAAATCTGTGCCAGGCAGTAAACAAGCCCATATTTGGTGGATGGCTC	IAP_LTR:+:12	IAP_LTR	12	probe_tm:84.86	experimental
TTCCGGACTCCCTGGCCAGCCTGGACGGAAATCTGTGCCAGGCAGTAAACAAGCCCATATTTGGTGGATGGCTCGC	IAP_LTR:+:13	IAP_LTR	13	probe_tm:85.74	experimental
TCCGGACTCCCTGGCCAGCCTGGACGGAAATCTGTGCCAGGCAGTAAACAAGCCCATATTTGGTGGATGGCTCGCC	IAP_LTR:+:14	IAP_LTR	14	probe_tm:86.28	experimental
CCGGACTCCCTGGCCAGCCTGGACGGAAATCTGTGCCAGGCAGTAAACAAGCCCATATTTGGTGGATGGCTCGCC	IAP_LTR:+:15	IAP_LTR	15	probe_tm:86.50	experimental
CGGACTCCCTGGCCAGCCTGGACGGAAATCTGTGCCAGGCAGTAAACAAGCCCATATTTGGTGGATGGCTCGCCC	IAP_LTR:+:16	IAP_LTR	16	probe_tm:86.50	experimental
GGACTCCCTGGCCAGCCTGGACGGAAATCTGTGCCAGGCAGTAAACAAGCCCATATTTGGTGGATGGCTCGCCCT	IAP_LTR:+:17	IAP_LTR	17	probe_tm:85.95	experimental
GACTCCCTGGCCAGCCTGGACGGAAATCTGTGCCAGGCAGTAAACAAGCCCATATTTGGTGGATGGCTCGCCCTTA	IAP_LTR:+:18	IAP_LTR	18	probe_tm:85.20	experimental
ACTCCCTGGCCAGCCTGGACGGAAATCTGTGCCAGGCAGTAAACAAGCCCATATTTGGTGGATGGCTCGCCCTTA	IAP_LTR:+:19	IAP_LTR	19	probe_tm:84.86	experimental
CTCCCTGGCCAGCCTGGACGGAAATCTGTGCCAGGCAGTAAACAAGCCCATATTTGGTGGATGGCTCGCCCTTAA	IAP_LTR:+:20	IAP_LTR	20	probe_tm:84.86	experimental
TCCCTGGCCAGCCTGGACGGAAATCTGTGCCAGGCAGTAAACAAGCCCATATTTGGTGGATGGCTCGCCCTTAATC	IAP_LTR:+:21	IAP_LTR	21	probe_tm:84.66	experimental
CCCTGGCCAGCCTGGACGGAAATCTGTGCCAGGCAGTAAACAAGCCCATATTTGGTGGATGGCTCGCCCTTAATC	IAP_LTR:+:22	IAP_LTR	22	probe_tm:84.86	experimental
CCTGGCCAGCCTGGACGGAAATCTGTGCCAGGCAGTAAACAAGCCCATATTTGGTGGATGGCTCGCCCTTAATCC	IAP_LTR:+:23	IAP_LTR	23	probe_tm:84.86	experimental
CTGGCCAGCCTGGACGGAAATCTGTGCCAGGCAGTAAACAAGCCCATATTTGGTGGATGGCTCGCCCTTAATCCC	IAP_LTR:+:24	IAP_LTR	24	probe_tm:84.86	experimental
TGGCCAGCCTGGACGGAAATCTGTGCCAGGCAGTAAACAAGCCCATATTTGGTGGATGGCTCGCCCTTAATCCCTGA	IAP_LTR:+:25	IAP_LTR	25	probe_tm:84.47	experimental
GGCCAGCCTGGACGGAAATCTGTGCCAGGCAGTAAACAAGCCCATATTTGGTGGATGGCTCGCCCTTAATCCCTGA	IAP_LTR:+:26	IAP_LTR	26	probe_tm:84.66	experimental
GCCAGCCTGGACGGAAATCTGTGCCAGGCAGTAAACAAGCCCATATTTGGTGGATGGCTCGCCCTTAATCCCTGAT	IAP_LTR:+:27	IAP_LTR	27	probe_tm:84.12	experimental
CCAGCCTGGACGGAAATCTGTGCCAGGCAGTAAACAAGCCCATATTTGGTGGATGGCTCGCCCTTAATCCCTGAT	IAP_LTR:+:28	IAP_LTR	28	probe_tm:83.76	experimental
CAGCCTGGACGGAAATCTGTGCCAGGCAGTAAACAAGCCCATATTTGGTGGATGGCTCGCCCTTAATCCCTGATTG	IAP_LTR:+:29	IAP_LTR	29	probe_tm:83.58	experimental
AGCCTGGACGGAAATCTGTGCCAGGCAGTAAACAAGCCCATATTTGGTGGATGGCTCGCCCTTAATCCCTGATTG	IAP_LTR:+:30	IAP_LTR	30	probe_tm:83.22	experimental
GCCTGGACGGAAATCTGTGCCAGGCAGTAAACAAGCCCATATTTGGTGGATGGCTCGCCCTTAATCCCTGATTGGC	IAP_LTR:+:31	IAP_LTR	31	probe_tm:84.12	experimental
CCTGGACGGAAATCTGTGCCAGGCAGTAAACAAGCCCATATTTGGTGGATGGCTCGCCCTTAATCCCTGATTGGC	IAP_LTR:+:32	IAP_LTR	32	probe_tm:83.76	experimental
CTGGACGGAAATCTGTGCCAGGCAGTAAACAAGCCCATATTTGGTGGATGGCTCGCCCTTAATCCCTGATTGGCTGA	IAP_LTR:+:33	IAP_LTR	33	probe_tm:83.40	experimental
TGGACGGAAATCTGTGCCAGGCAGTAAACAAGCCCATATTTGGTGGATGGCTCGCCCTTAATCCCTGATTGGCTGAGCA	IAP_LTR:+:34	IAP_LTR	34	probe_tm:83.58	experimental
GGACGGAAATCTGTGCCAGGCAGTAAACAAGCCCATATTTGGTGGATGGCTCGCCCTTAATCCCTGATTGGCTGAGCA	IAP_LTR:+:35	IAP_LTR	35	probe_tm:83.76	experimental
GACGGAAATCTGTGCCAGGCAGTAAACAAGCCCATATTTGGTGGATGGCTCGCCCTTAATCCCTGATTGGCTGAGCAA	IAP_LTR:+:36	IAP_LTR	36	probe_tm:83.23	experimental
ACGGAAATCTGTGCCAGGCAGTAAACAAGCCCATATTTGGTGGATGGCTCGCCCTTAATCCCTGATTGGCTGAGCAA	IAP_LTR:+:37	IAP_LTR	37	probe_tm:82.87	experimental
CGGAAATCTGTGCCAGGCAGTAAACAAGCCCATATTTGGTGGATGGCTCGCCCTTAATCCCTGATTGGCTGAGCAAGC	IAP_LTR:+:38	IAP_LTR	38	probe_tm:83.76	experimental
GGAAATCTGTGCCAGGCAGTAAACAAGCCCATATTTGGTGGATGGCTCGCCCTTAATCCCTGATTGGCTGAGCAAGCC	IAP_LTR:+:39	IAP_LTR	39	probe_tm:83.76	experimental
GAAATCTGTGCCAGGCAGTAAACAAGCCCATATTTGGTGGATGGCTCGCCCTTAATCCCTGATTGGCTGAGCAAGCCTGC	IAP_LTR:+:40	IAP_LTR	40	probe_tm:83.92	experimental
GGGGATTTGAAGAGAGAAGCTGCCTGAGTAAACTGCTTTAAGAAGAACCGGTGGTTGCGTTTTCCTTGCTG	IAP_LTR:+:204	IAP_LTR	204	probe_tm:81.08	experimental
GGGATTTGAAGAGAGAAGCTGCCTGAGTAAACTGCTTTAAGAAGAACCGGTGGTTGCGTTTTCCTTGCTGG	IAP_LTR:+:205	IAP_LTR	205	probe_tm:81.08	experimental
GGATTTGAAGAGAGAAGCTGCCTGAGTAAACTGCTTTAAGAAGAACCGGTGGTTGCGTTTTCCTTGCTGGTC	IAP_LTR:+:206	IAP_LTR	206	probe_tm:80.92	experimental
GATTTGAAGAGAGAAGCTGCCTGAGTAAACTGCTTTAAGAAGAACCGGTGGTTGCGTTTTCCTTGCTGGTCGA	IAP_LTR:+:207	IAP_LTR	207	probe_tm:80.77	experimental
ATTTGAAGAGAGAAGCTGCCTGAGTAAACTGCTTTAAGAAGAACCGGTGGTTGCGTTTTCCTTGCTGGTCGA	IAP_LTR:+:208	IAP_LTR	208	probe_tm:80.36	experimental
TTTGAAGAGAGAAGCTGCCTGAGTAAACTGCTTTAAGAAGAACCGGTGGTTGCGTTTTCCTTGCTGGTCGAG	IAP_LTR:+:209	IAP_LTR	209	probe_tm:80.92	experimental
TTGAAGAGAGAAGCTGCCTGAGTAAACTGCTTTAAGAAGAACCGGTGGTTGCGTTTTCCTTGCTGGTCGAGT	IAP_LTR:+:210	IAP_LTR	210	probe_tm:80.92	experimental
TGAAGAGAGAAGCTGCCTGAGTAAACTGCTTTAAGAAGAACCGGTGGTTGCGTTTTCCTTGCTGGTCGAGTTG	IAP_LTR:+:211	IAP_LTR	211	probe_tm:81.34	experimental
GAAGAGAGAAGCTGCCTGAGTAAACTGCTTTAAGAAGAACCGGTGGTTGCGTTTTCCTTGCTGGTCGAGTTG	IAP_LTR:+:212	IAP_LTR	212	probe_tm:81.49	experimental
AAGAGAGAAGCTGCCTGAGTAAACTGCTTTAAGAAGAACCGGTGGTTGCGTTTTCCTTGCTGGTCGAGTTG	IAP_LTR:+:213	IAP_LTR	213	probe_tm:81.08	experimental
AGAGAGAAGCTGCCTGAGTAAACTGCTTTAAGAAGAACCGGTGGTTGCGTTTTCCTTGCTGGTCGAGTTGGA	IAP_LTR:+:214	IAP_LTR	214	probe_tm:81.49	experimental
GAGAGAAGCTGCCTGAGTAAACTGCTTTAAGAAGAACCGGTGGTTGCGTTTTCCTTGCTGGTCGAGTTGGAC	IAP_LTR:+:215	IAP_LTR	215	probe_tm:82.06	experimental
AGAGAAGCTGCCTGAGTAAACTGCTTTAAGAAGAACCGGTGGTTGCGTTTTCCTTGCTGGTCGAGTTGGAC	IAP_LTR:+:216	IAP_LTR	216	probe_tm:81.66	experimental
GAGAAGCTGCCTGAGTAAACTGCTTTAAGAAGAACCGGTGGTTGCGTTTTCCTTGCTGGTCGAGTTGGACGCA	IAP_LTR:+:217	IAP_LTR	217	probe_tm:82.46	experimental
AGAAGCTGCCTGAGTAAACTGCTTTAAGAAGAACCGGTGGTTGCGTTTTCCTTGCTGGTCGAGTTGGACGCA	IAP_LTR:+:218	IAP_LTR	218	probe_tm:82.06	experimental
GAAGCTGCCTGAGTAAACTGCTTTAAGAAGAACCGGTGGTTGCGTTTTCCTTGCTGGTCGAGTTGGACGCAA	IAP_LTR:+:219	IAP_LTR	219	probe_tm:82.06	experimental
AAGCTGCCTGAGTAAACTGCTTTAAGAAGAACCGGTGGTTGCGTTTTCCTTGCTGGTCGAGTTGGACGCAA	IAP_LTR:+:220	IAP_LTR	220	probe_tm:81.66	experimental
AGCTGCCTGAGTAAACTGCTTTAAGAAGAACCGGTGGTTGCGTTTTCCTTGCTGGTCGAGTTGGACGCAACA	IAP_LTR:+:221	IAP_LTR	221	probe_tm:82.06	experimental
GCTGCCTGAGTAAACTGCTTTAAGAAGAACCGGTGGTTGCGTTTTCCTTGCTGGTCGAGTTGGACGCAACA	IAP_LTR:+:222	IAP_LTR	222	probe_tm:82.24	experimental
CTGCCTGAGTAAACTGCTTTAAGAAGAACCGGTGGTTGCGTTTTCCTTGCTGGTCGAGTTGGACGCAACA	IAP_LTR:+:223	IAP_LTR	223	probe_tm:81.83	experimental
TGCCTGAGTAAACTGCTTTAAGAAGAACCGGTGGTTGCGTTTTCCTTGCTGGTCGAGTTGGACGCAACA	IAP_LTR:+:224	IAP_LTR	224	probe_tm:81.40	experimental
GCCTGAGTAAACTGCTTTAAGAAGAACCGGTGGTTGCGTTTTCCTTGCTGGTCGAGTTGGACGCAACA	IAP_LTR:+:225	IAP_LTR	225	probe_tm:81.57	experimental
CCTGAGTAAACTGCTTTAAGAAGAACCGGTGGTTGCGTTTTCCTTGCTGGTCGAGTTGGACGCAACA	IAP_LTR:+:226	IAP_LTR	226	probe_tm:81.14	experimental
CTGAGTAAACTGCTTTAAGAAGAACCGGTGGTTGCGTTTTCCTTGCTGGTCGAGTTGGACGCAACA	IAP_LTR:+:227	IAP_LTR	227	probe_tm:80.68	experimental
TGAGTAAACTGCTTTAAGAAGAACCGGTGGTTGCGTTTTCCTTGCTGGTCGAGTTGGACGCAACA	IAP_LTR:+:228	IAP_LTR	228	probe_tm:80.22	experimental
GAGTAAACTGCTTTAAGAAGAACCGGTGGTTGCGTTTTCCTTGCTGGTCGAGTTGGACGCAACA	IAP_LTR:+:229	IAP_LTR	229	probe_tm:80.38	experimental
AGTAAACTGCTTTAAGAAGAACCGGTGGTTGCGTTTTCCTTGCTGGTCGAGTTGGACGCAACA	IAP_LTR:+:230	IAP_LTR	230	probe_tm:79.90	experimental
GTAAACTGCTTTAAGAAGAACCGGTGGTTGCGTTTTCCTTGCTGGTCGAGTTGGACGCAACA	IAP_LTR:+:231	IAP_LTR	231	probe_tm:80.06	experimental
TAAACTGCTTTAAGAAGAACCGGTGGTTGCGTTTTCCTTGCTGGTCGAGTTGGACGCAACA	IAP_LTR:+:232	IAP_LTR	232	probe_tm:79.55	experimental
AAACTGCTTTAAGAAGAACCGGTGGTTGCGTTTTCCTTGCTGGTCGAGTTGGACGCAACA	IAP_LTR:+:233	IAP_LTR	233	probe_tm:79.71	experimental
AACTGCTTTAAGAAGAACCGGTGGTTGCGTTTTCCTTGCTGGTCGAGTTGGACGCAACA	IAP_LTR:+:234	IAP_LTR	234	probe_tm:79.88	experimental
ACTGCTTTAAGAAGAACCGGTGGTTGCGTTTTCCTTGCTGGTCGAGTTGGACGCAACA	IAP_LTR:+:235	IAP_LTR	235	probe_tm:80.05	experimental
CTGCTTTAAGAAGAACCGGTGGTTGCGTTTTCCTTGCTGGTCGAGTTGGACGCAACA	IAP_LTR:+:236	IAP_LTR	236	probe_tm:80.23	experimental
TGCTTTAAGAAGAACCGGTGGTTGCGTTTTCCTTGCTGGTCGAGTTGGACGCAACA	IAP_LTR:+:237	IAP_LTR	237	probe_tm:79.68	experimental
GCTTTAAGAAGAACCGGTGGTTGCGTTTTCCTTGCTGGTCGAGTTGGACGCAACA	IAP_LTR:+:238	IAP_LTR	238	probe_tm:79.86	experimental
CTTTAAGAAGAACCGGTGGTTGCGTTTTCCTTGCTGGTCGAGTTGGACGCAACA	IAP_LTR:+:239	IAP_LTR	239	probe_tm:79.29	experimental
TTTAAGAAGAACCGGTGGTTGCGTTTTCCTTGCTGGTCGAGTTGGACGCAACA	IAP_LTR:+:240	IAP_LTR	240	probe_tm:78.69	experimental
TTAAGAAGAACCGGTGGTTGCGTTTTCCTTGCTGGTCGAGTTGGACGCAACA	IAP_LTR:+:241	IAP_LTR	241	probe_tm:78.86	experimental
TAAGAAGAACCGGTGGTTGCGTTTTCCTTGCTGGTCGAGTTGGACGCAACA	IAP_LTR:+:242	IAP_LTR	242	probe_tm:79.03	experimental
AAGAAGAACCGGTGGTTGCGTTTTCCTTGCTGGTCGAGTTGGACGCAACA	IAP_LTR:+:243	IAP_LTR	243	probe_tm:79.22	experimental
ATTTATTCTTTAAACAATCATTTACAGAGAGTGCGCTTACTGTGCACCAATAGTTAACAACAATCAAGACTAGACA	L1_A:+:1	L1_A	1	probe_tm:75.49	experimental
TTTATTCTTTAAACAATCATTTACAGAGAGTGCGCTTACTGTGCACCAATAGTTAACAACAATCAAGACTAGACAA	L1_A:+:2	L1_A	2	probe_tm:75.49	experimental
TTATTCTTTAAACAATCATTTACAGAGAGTGCGCTTACTGTGCACCAATAGTTAACAACAATCAAGACTAGACAATG	L1_A:+:3	L1_A	3	probe_tm:75.95	experimental
TATTCTTTAAACAATCATTTACAGAGAGTGCGCTTACTGTGCACCAATAGTTAACAACAATCAAGACTAGACAATGT	L1_A:+:4	L1_A	4	probe_tm:75.95	experimental
ATTCTTTAAACAATCATTTACAGAGAGTGCGCTTACTGTGCACCAATAGTTAACAACAATCAAGACTAGACAATGT	L1_A:+:5	L1_A	5	probe_tm:76.03	experimental
TTCTTTAAACAATCATTTACAGAGAGTGCGCTTACTGTGCACCAATAGTTAACAACAATCAAGACTAGACAATGTTA	L1_A:+:6	L1_A	6	probe_tm:75.95	experimental
TCTTTAAACAATCATTTACAGAGAGTGCGCTTACTGTGCACCAATAGTTAACAACAATCAAGACTAGACAATGTTATG	L1_A:+:7	L1_A	7	probe_tm:76.40	experimental
CTTTAAACAATCATTTACAGAGAGTGCGCTTACTGTGCACCAATAGTTAACAACAATCAAGACTAGACAATGTTATG	L1_A:+:8	L1_A	8	probe_tm:76.48	experimental
TTTAAACAATCATTTACAGAGAGTGCGCTTACTGTGCACCAATAGTTAACAACAATCAAGACTAGACAATGTTATGG	L1_A:+:9	L1_A	9	probe_tm:76.48	experimental
TTAAACAATCATTTACAGAGAGTGCGCTTACTGTGCACCAATAGTTAACAACAATCAAGACTAGACAATGTTATGGT	L1_A:+:10	L1_A	10	probe_tm:76.48	experimental
TAAACAATCATTTACAGAGAGTGCGCTTACTGTGCACCAATAGTTAACAACAATCAAGACTAGACAATGTTATGGTT	L1_A:+:11	L1_A	11	probe_tm:76.48	experimental
AAACAATCATTTACAGAGAGTGCGCTTACTGTGCACCAATAGTTAACAACAATCAAGACTAGACAATGTTATGGTT	L1_A:+:12	L1_A	12	probe_tm:76.57	experimental
AACAATCATTTACAGAGAGTGCGCTTACTGTGCACCAATAGTTAACAACAATCAAGACTAGACAATGTTATGGTTTA	L1_A:+:13	L1_A	13	probe_tm:76.48	experimental
ACAATCATTTACAGAGAGTGCGCTTACTGTGCACCAATAGTTAACAACAATCAAGACTAGACAATGTTATGGTTTAA	L1_A:+:14	L1_A	14	probe_tm:76.48	experimental
CAATCATTTACAGAGAGTGCGCTTACTGTGCACCAATAGTTAACAACAATCAAGACTAGACAATGTTATGGTTTAATGA	L1_A:+:15	L1_A	15	probe_tm:76.83	experimental
AATCATTTACAGAGAGTGCGCTTACTGTGCACCAATAGTTAACAACAATCAAGACTAGACAATGTTATGGTTTAATGA	L1_A:+:16	L1_A	16	probe_tm:76.40	experimental
ATCATTTACAGAGAGTGCGCTTACTGTGCACCAATAGTTAACAACAATCAAGACTAGACAATGTTATGGTTTAATGAA	L1_A:+:17	L1_A	17	probe_tm:76.40	experimental
TCATTTACAGAGAGTGCGCTTACTGTGCACCAATAGTTAACAACAATCAAGACTAGACAATGTTATGGTTTAATGAAG	L1_A:+:18	L1_A	18	probe_tm:76.92	experimental
CATTTACAGAGAGTGCGCTTACTGTGCACCAATAGTTAACAACAATCAAGACTAGACAATGTTATGGTTTAATGAAG	L1_A:+:19	L1_A	19	probe_tm:77.01	experimental
ATTTACAGAGAGTGCGCTTACTGTGCACCAATAGTTAACAACAATCAAGACTAGACAATGTTATGGTTTAATGAAG	L1_A:+:20	L1_A	20	probe_tm:76.57	experimental
TTTACAGAGAGTGCGCTTACTGTGCACCAATAGTTAACAACAATCAAGACTAGACAATGTTATGGTTTAATGAAGT	L1_A:+:21	L1_A	21	probe_tm:76.57	experimental
TTACAGAGAGTGCGCTTACTGTGCACCAATAGTTAACAACAATCAAGACTAGACAATGTTATGGTTTAATGAAGTTCA	L1_A:+:22	L1_A	22	probe_tm:76.92	experimental
TACAGAGAGTGCGCTTACTGTGCACCAATAGTTAACAACAATCAAGACTAGACAATGTTATGGTTTAATGAAGTTCAC	L1_A:+:23	L1_A	23	probe_tm:77.45	experimental
ACAGAGAGTGCGCTTACTGTGCACCAATAGTTAACAACAATCAAGACTAGACAATGTTATGGTTTAATGAAGTTCAC	L1_A:+:24	L1_A	24	probe_tm:77.55	experimental
CAGAGAGTGCGCTTACTGTGCACCAATAGTTAACAACAATCAAGACTAGACAATGTTATGGTTTAATGAAGTTCACC	L1_A:+:25	L1_A	25	probe_tm:78.08	experimental
AGAGAGTGCGCTTACTGTGCACCAATAGTTAACAACAATCAAGACTAGACAATGTTATGGTTTAATGAAGTTCACC	L1_A:+:26	L1_A	26	probe_tm:77.65	experimental
GAGAGTGCGCTTACTGTGCACCAATAGTTAACAACAATCAAGACTAGACAATGTTATGGTTTAATGAAGTTCACCT	L1_A:+:27	L1_A	27	probe_tm:77.65	experimental
AGAGTGCGCTTACTGTGCACCAATAGTTAACAACAATCAAGACTAGACAATGTTATGGTTTAATGAAGTTCACCT	L1_A:+:28	L1_A	28	probe_tm:77.20	experimental
GAGTGCGCTTACTGTGCACCAATAGTTAACAACAATCAAGACTAGACAATGTTATGGTTTAATGAAGTTCACCTTC	L1_A:+:29	L1_A	29	probe_tm:77.65	experimental
AGTGCGCTTACTGTGCACCAATAGTTAACAACAATCAAGACTAGACAATGTTATGGTTTAATGAAGTTCACCTTC	L1_A:+:30	L1_A	30	probe_tm:77.20	experimental
GTGCGCTTACTGTGCACCAATAGTTAACAACAATCAAGACTAGACAATGTTATGGTTTAATGAAGTTCACCTTCT	L1_A:+:31	L1_A	31	probe_tm:77.20	experimental
TGCGCTTACTGTGCACCAATAGTTAACAACAATCAAGACTAGACAATGTTATGGTTTAATGAAGTTCACCTTCTTG	L1_A:+:32	L1_A	32	probe_tm:77.11	experimental
GCGCTTACTGTGCACCAATAGTTAACAACAATCAAGACTAGACAATGTTATGGTTTAATGAAGTTCACCTTCTTG	L1_A:+:33	L1_A	33	probe_tm:77.20	experimental
CGCTTACTGTGCACCAATAGTTAACAACAATCAAGACTAGACAATGTTATGGTTTAATGAAGTTCACCTTCTTG	L1_A:+:34	L1_A	34	probe_tm:76.75	experimental
GCTTACTGTGCACCAATAGTTAACAACAATCAAGACTAGACAATGTTATGGTTTAATGAAGTTCACCTTCTTGGA	L1_A:+:35	L1_A	35	probe_tm:76.66	experimental
CTTACTGTGCACCAATAGTTAACAACAATCAAGACTAGACAATGTTATGGTTTAATGAAGTTCACCTTCTTGGA	L1_A:+:36	L1_A	36	probe_tm:76.19	experimental
TTACTGTGCACCAATAGTTAACAACAATCAAGACTAGACAATGTTATGGTTTAATGAAGTTCACCTTCTTGGACA	L1_A:+:37	L1_A	37	probe_tm:76.11	experimental
TACTGTGCACCAATAGTTAACAACAATCAAGACTAGACAATGTTATGGTTTAATGAAGTTCACCTTCTTGGACAGA	L1_A:+:38	L1_A	38	probe_tm:76.57	experimental
ACTGTGCACCAATAGTTAACAACAATCAAGACTAGACAATGTTATGGTTTAATGAAGTTCACCTTCTTGGACAGA	L1_A:+:39	L1_A	39	probe_tm:76.66	experimental
CTGTGCACCAATAGTTAACAACAATCAAGACTAGACAATGTTATGGTTTAATGAAGTTCACCTTCTTGGACAGAA	L1_A:+:40	L1_A	40	probe_tm:76.66	experimental
GACTTTTGGTATAGCATTGGAAATGTAAATGAGTTAAATGAGTTAAATACCTAATAAAAAATGGGAAA	L1_A:+:6653	L1_A	6653	probe_tm:71.93	experimental
ACTTTTGGTATAGCATTGGAAATGTAAATGAGTTAAATGAGTTAAATACCTAATAAAAAATGGGAAA	L1_A:+:6654	L1_A	6654	probe_tm:71.34	experimental
CTTTTGGTATAGCATTGGAAATGTAAATGAGTTAAATGAGTTAAATACCTAATAAAAAATGGGAAAA	L1_A:+:6655	L1_A	6655	probe_tm:71.34	experimental
TTTTGGTATAGCATTGGAAATGTAAATGAGTTAAATGAGTTAAATACCTAATAAAAAATGGGAAAAA	L1_A:+:6656	L1_A	6656	probe_tm:70.73	experimental
TTTGGTATAGCATTGGAAATGTAAATGAGTTAAATGAGTTAAATACCTAATAAAAAATGGGAAAAAA	L1_A:+:6657	L1_A	6657	probe_tm:70.73	experimental
TTGGTATAGCATTGGAAATGTAAATGAGTTAAATGAGTTAAATACCTAATAAAAAATGGGAAAAAAA	L1_A:+:6658	L1_A	6658	probe_tm:70.73	experimental
TGGTATAGCATTGGAAATGTAAATGAGTTAAATGAGTTAAATACCTAATAAAAAATGGGAAAAAAAA	L1_A:+:6659	L1_A	6659	probe_tm:70.73	experimental
GGTATAGCATTGGAAATGTAAATGAGTTAAATGAGTTAAATACCTAATAAAAAATGGGAAAAAAAA	L1_A:+:6660	L1_A	6660	probe_tm:70.75	experimental
GTATAGCATTGGAAATGTAAATGAGTTAAATGAGTTAAATACCTAATAAAAAATGGGAAAAAAAAA	L1_A:+:6661	L1_A	6661	probe_tm:70.12	experimental
TATAGCATTGGAAATGTAAATGAGTTAAATGAGTTAAATACCTAATAAAAAATGGGAAAAAAAAAA	L1_A:+:6662	L1_A	6662	probe_tm:69.50	experimental
ATAGCATTGGAAATGTAAATGAGTTAAATGAGTTAAATACCTAATAAAAAATGGGAAAAAAAAAA	L1_A:+:6663	L1_A	6663	probe_tm:69.50	experimental
TAGCATTGGAAATGTAAATGAGTTAAATGAGTTAAATACCTAATAAAAAATGGGAAAAAAAAAAA	L1_A:+:6664	L1_A	6664	probe_tm:69.50	experimental
AGCATTGGAAATGTAAATGAGTTAAATGAGTTAAATACCTAATAAAAAATGGGAAAAAAAAAAA	L1_A:+:6665	L1_A	6665	probe_tm:69.49	experimental
GCATTGGAAATGTAAATGAGTTAAATGAGTTAAATACCTAATAAAAAATGGGAAAAAAAAAAAA	L1_A:+:6666	L1_A	6666	probe_tm:69.49	experimental
CATTGGAAATGTAAATGAGTTAAATGAGTTAAATACCTAATAAAAAATGGGAAAAAAAAAAAA	L1_A:+:6667	L1_A	6667	probe_tm:68.83	experimental
ATTGGAAATGTAAATGAGTTAAATGAGTTAAATACCTAATAAAAAATGGGAAAAAAAAAAAA	L1_A:+:6668	L1_A	6668	probe_tm:68.16	experimental
TTGGAAATGTAAATGAGTTAAATGAGTTAAATACCTAATAAAAAATGGGAAAAAAAAAAAAA	L1_A:+:6669	L1_A	6669	probe_tm:68.16	experimental
TGGAAATGTAAATGAGTTAAATGAGTTAAATACCTAATAAAAAATGGGAAAAAAAAAAAAAA	L1_A:+:6670	L1_A	6670	probe_tm:68.16	experimental
GGAAATGTAAATGAGTTAAATGAGTTAAATACCTAATAAAAAATGGGAAAAAAAAAAAAAA	L1_A:+:6671	L1_A	6671	probe_tm:68.13	experimental
GAAATGTAAATGAGTTAAATGAGTTAAATACCTAATAAAAAATGGGAAAAAAAAAAAAAAA	L1_A:+:6672	L1_A	6672	probe_tm:67.45	experimental
AAATGTAAATGAGTTAAATGAGTTAAATACCTAATAAAAAATGGGAAAAAAAAAAAAAAA	L1_A:+:6673	L1_A	6673	probe_tm:66.73	experimental
AATGTAAATGAGTTAAATGAGTTAAATACCTAATAAAAAATGGGAAAAAAAAAAAAAAAGA	L1_A:+:6674	L1_A	6674	probe_tm:67.45	experimental
ATGTAAATGAGTTAAATGAGTTAAATACCTAATAAAAAATGGGAAAAAAAAAAAAAAAGAA	L1_A:+:6675	L1_A	6675	probe_tm:67.45	experimental
TGTAAATGAGTTAAATGAGTTAAATACCTAATAAAAAATGGGAAAAAAAAAAAAAAAGAAA	L1_A:+:6676	L1_A	6676	probe_tm:67.45	experimental
GTAAATGAGTTAAATGAGTTAAATACCTAATAAAAAATGGGAAAAAAAAAAAAAAAGAAA	L1_A:+:6677	L1_A	6677	probe_tm:67.41	experimental
TAAATGAGTTAAATGAGTTAAATACCTAATAAAAAATGGGAAAAAAAAAAAAAAAGAAAA	L1_A:+:6678	L1_A	6678	probe_tm:66.73	experimental
AAATGAGTTAAATGAGTTAAATACCTAATAAAAAATGGGAAAAAAAAAAAAAAAGAAAA	L1_A:+:6679	L1_A	6679	probe_tm:66.68	experimental
AATGAGTTAAATGAGTTAAATACCTAATAAAAAATGGGAAAAAAAAAAAAAAAGAAAAGA	L1_A:+:6680	L1_A	6680	probe_tm:67.41	experimental
ATGAGTTAAATGAGTTAAATACCTAATAAAAAATGGGAAAAAAAAAAAAAAAGAAAAGAA	L1_A:+:6681	L1_A	6681	probe_tm:67.41	experimental
TGAGTTAAATGAGTTAAATACCTAATAAAAAATGGGAAAAAAAAAAAAAAAGAAAAGAAA	L1_A:+:6682	L1_A	6682	probe_tm:67.41	experimental
GAGTTAAATGAGTTAAATACCTAATAAAAAATGGGAAAAAAAAAAAAAAAGAAAAGAAA	L1_A:+:6683	L1_A	6683	probe_tm:67.37	experimental
AGTTAAATGAGTTAAATACCTAATAAAAAATGGGAAAAAAAAAAAAAAAGAAAAGAAA	L1_A:+:6684	L1_A	6684	probe_tm:66.62	experimental
GTTAAATGAGTTAAATACCTAATAAAAAATGGGAAAAAAAAAAAAAAAGAAAAGAAA	L1_A:+:6685	L1_A	6685	probe_tm:66.56	experimental
TTAAATGAGTTAAATACCTAATAAAAAATGGGAAAAAAAAAAAAAAAGAAAAGAAA	L1_A:+:6686	L1_A	6686	probe_tm:65.77	experimental
TAAATGAGTTAAATACCTAATAAAAAATGGGAAAAAAAAAAAAAAAGAAAAGAAA	L1_A:+:6687	L1_A	6687	probe_tm:65.70	experimental
AAATGAGTTAAATACCTAATAAAAAATGGGAAAAAAAAAAAAAAAGAAAAGAAA	L1_A:+:6688	L1_A	6688	probe_tm:65.62	experimental
AATGAGTTAAATACCTAATAAAAAATGGGAAAAAAAAAAAAAAAGAAAAGAAA	L1_A:+:6689	L1_A	6689	probe_tm:65.54	experimental
ATGAGTTAAATACCTAATAAAAAATGGGAAAAAAAAAAAAAAAGAAAAGAAA	L1_A:+:6690	L1_A	6690	probe_tm:65.45	experimental
TGAGTTAAATACCTAATAAAAAATGGGAAAAAAAAAAAAAAAGAAAAGAAA	L1_A:+:6691	L1_A	6691	probe_tm:65.37	experimental
GAGTTAAATACCTAATAAAAAATGGGAAAAAAAAAAAAAAAGAAAAGAAA	L1_A:+:6692	L1_A	6692	probe_tm:65.28	experimental
TGGAGCTTCTGGGCGGCGCCATCTTCAGCTCCAGACAGCCGGCCACCTTCCTGGTGAGAGCACGGGGGTCTGCCCGGC	L1_Gf:+:1	L1_Gf	1	probe_tm:90.59	experimental
GGAGCTTCTGGGCGGCGCCATCTTCAGCTCCAGACAGCCGGCCACCTTCCTGGTGAGAGCACGGGGGTCTGCCCGGC	L1_Gf:+:2	L1_Gf	2	probe_tm:90.86	experimental
GAGCTTCTGGGCGGCGCCATCTTCAGCTCCAGACAGCCGGCCACCTTCCTGGTGAGAGCACGGGGGTCTGCCCGGCC	L1_Gf:+:3	L1_Gf	3	probe_tm:90.86	experimental
AGCTTCTGGGCGGCGCCATCTTCAGCTCCAGACAGCCGGCCACCTTCCTGGTGAGAGCACGGGGGTCTGCCCGGCC	L1_Gf:+:4	L1_Gf	4	probe_tm:90.59	experimental
GCTTCTGGGCGGCGCCATCTTCAGCTCCAGACAGCCGGCCACCTTCCTGGTGAGAGCACGGGGGTCTGCCCGGCCTGA	L1_Gf:+:5	L1_Gf	5	probe_tm:90.59	experimental
CTTCTGGGCGGCGCCATCTTCAGCTCCAGACAGCCGGCCACCTTCCTGGTGAGAGCACGGGGGTCTGCCCGGCCTGA	L1_Gf:+:6	L1_Gf	6	probe_tm:90.33	experimental
TTCTGGGCGGCGCCATCTTCAGCTCCAGACAGCCGGCCACCTTCCTGGTGAGAGCACGGGGGTCTGCCCGGCCTGAGA	L1_Gf:+:7	L1_Gf	7	probe_tm:90.06	experimental
TCTGGGCGGCGCCATCTTCAGCTCCAGACAGCCGGCCACCTTCCTGGTGAGAGCACGGGGGTCTGCCCGGCCTGAGAG	L1_Gf:+:8	L1_Gf	8	probe_tm:90.59	experimental
CTGGGCGGCGCCATCTTCAGCTCCAGACAGCCGGCCACCTTCCTGGTGAGAGCACGGGGGTCTGCCCGGCCTGAGAG	L1_Gf:+:9	L1_Gf	9	probe_tm:90.86	experimental
TGGGCGGCGCCATCTTCAGCTCCAGACAGCCGGCCACCTTCCTGGTGAGAGCACGGGGGTCTGCCCGGCCTGAGAGG	L1_Gf:+:10	L1_Gf	10	probe_tm:90.86	experimental
GGGCGGCGCCATCTTCAGCTCCAGACAGCCGGCCACCTTCCTGGTGAGAGCACGGGGGTCTGCCCGGCCTGAGAGG	L1_Gf:+:11	L1_Gf	11	probe_tm:91.13	experimental
GGCGGCGCCATCTTCAGCTCCAGACAGCCGGCCACCTTCCTGGTGAGAGCACGGGGGTCTGCCCGGCCTGAGAGGT	L1_Gf:+:12	L1_Gf	12	probe_tm:90.59	experimental
GCGGCGCCATCTTCAGCTCCAGACAGCCGGCCACCTTCCTGGTGAGAGCACGGGGGTCTGCCCGGCCTGAGAGGTT	L1_Gf:+:13	L1_Gf	13	probe_tm:90.05	experimental
CGGCGCCATCTTCAGCTCCAGACAGCCGGCCACCTTCCTGGTGAGAGCACGGGGGTCTGCCCGGCCTGAGAGGTT	L1_Gf:+:14	L1_Gf	14	probe_tm:89.78	experimental
GGCGCCATCTTCAGCTCCAGACAGCCGGCCACCTTCCTGGTGAGAGCACGGGGGTCTGCCCGGCCTGAGAGGTTTG	L1_Gf:+:15	L1_Gf	15	probe_tm:89.52	experimental
GCGCCATCTTCAGCTCCAGACAGCCGGCCACCTTCCTGGTGAGAGCACGGGGGTCTGCCCGGCCTGAGAGGTTTGTG	L1_Gf:+:16	L1_Gf	16	probe_tm:89.26	experimental
CGCCATCTTCAGCTCCAGACAGCCGGCCACCTTCCTGGTGAGAGCACGGGGGTCTGCCCGGCCTGAGAGGTTTGTG	L1_Gf:+:17	L1_Gf	17	probe_tm:88.98	experimental
GCCATCTTCAGCTCCAGACAGCCGGCCACCTTCCTGGTGAGAGCACGGGGGTCTGCCCGGCCTGAGAGGTTTGTGGCA	L1_Gf:+:18	L1_Gf	18	probe_tm:89.01	experimental
CCATCTTCAGCTCCAGACAGCCGGCCACCTTCCTGGTGAGAGCACGGGGGTCTGCCCGGCCTGAGAGGTTTGTGGCA	L1_Gf:+:19	L1_Gf	19	probe_tm:88.73	experimental
CATCTTCAGCTCCAGACAGCCGGCCACCTTCCTGGTGAGAGCACGGGGGTCTGCCCGGCCTGAGAGGTTTGTGGCACA	L1_Gf:+:20	L1_Gf	20	probe_tm:88.49	experimental
ATCTTCAGCTCCAGACAGCCGGCCACCTTCCTGGTGAGAGCACGGGGGTCTGCCCGGCCTGAGAGGTTTGTGGCACA	L1_Gf:+:21	L1_Gf	21	probe_tm:88.20	experimental
TCTTCAGCTCCAGACAGCCGGCCACCTTCCTGGTGAGAGCACGGGGGTCTGCCCGGCCTGAGAGGTTTGTGGCACAG	L1_Gf:+:22	L1_Gf	22	probe_tm:88.73	experimental
CTTCAGCTCCAGACAGCCGGCCACCTTCCTGGTGAGAGCACGGGGGTCTGCCCGGCCTGAGAGGTTTGTGGCACAG	L1_Gf:+:23	L1_Gf	23	probe_tm:88.98	experimental
TTCAGCTCCAGACAGCCGGCCACCTTCCTGGTGAGAGCACGGGGGTCTGCCCGGCCTGAGAGGTTTGTGGCACAGGC	L1_Gf:+:24	L1_Gf	24	probe_tm:89.26	experimental
TCAGCTCCAGACAGCCGGCCACCTTCCTGGTGAGAGCACGGGGGTCTGCCCGGCCTGAGAGGTTTGTGGCACAGGCGC	L1_Gf:+:25	L1_Gf	25	probe_tm:90.06	experimental
CAGCTCCAGACAGCCGGCCACCTTCCTGGTGAGAGCACGGGGGTCTGCCCGGCCTGAGAGGTTTGTGGCACAGGCGC	L1_Gf:+:26	L1_Gf	26	probe_tm:90.33	experimental
AGCTCCAGACAGCCGGCCACCTTCCTGGTGAGAGCACGGGGGTCTGCCCGGCCTGAGAGGTTTGTGGCACAGGCGC	L1_Gf:+:27	L1_Gf	27	probe_tm:90.05	experimental
GCTCCAGACAGCCGGCCACCTTCCTGGTGAGAGCACGGGGGTCTGCCCGGCCTGAGAGGTTTGTGGCACAGGCGCC	L1_Gf:+:28	L1_Gf	28	probe_tm:90.59	experimental
CTCCAGACAGCCGGCCACCTTCCTGGTGAGAGCACGGGGGTCTGCCCGGCCTGAGAGGTTTGTGGCACAGGCGCC	L1_Gf:+:29	L1_Gf	29	probe_tm:90.32	experimental
TCCAGACAGCCGGCCACCTTCCTGGTGAGAGCACGGGGGTCTGCCCGGCCTGAGAGGTTTGTGGCACAGGCGCCG	L1_Gf:+:30	L1_Gf	30	probe_tm:90.32	experimental
CCAGACAGCCGGCCACCTTCCTGGTGAGAGCACGGGGGTCTGCCCGGCCTGAGAGGTTTGTGGCACAGGCGCCG	L1_Gf:+:31	L1_Gf	31	probe_tm:90.60	experimental
CAGACAGCCGGCCACCTTCCTGGTGAGAGCACGGGGGTCTGCCCGGCCTGAGAGGTTTGTGGCACAGGCGCCGGC	L1_Gf:+:32	L1_Gf	32	probe_tm:90.87	experimental
AGACAGCCGGCCACCTTCCTGGTGAGAGCACGGGGGTCTGCCCGGCCTGAGAGGTTTGTGGCACAGGCGCCGGC	L1_Gf:+:33	L1_Gf	33	probe_tm:90.60	experimental
GACAGCCGGCCACCTTCCTGGTGAGAGCACGGGGGTCTGCCCGGCCTGAGAGGTTTGTGGCACAGGCGCCGGCG	L1_Gf:+:34	L1_Gf	34	probe_tm:91.15	experimental
ACAGCCGGCCACCTTCCTGGTGAGAGCACGGGGGTCTGCCCGGCCTGAGAGGTTTGTGGCACAGGCGCCGGCG	L1_Gf:+:35	L1_Gf	35	probe_tm:90.88	experimental
CAGCCGGCCACCTTCCTGGTGAGAGCACGGGGGTCTGCCCGGCCTGAGAGGTTTGTGGCACAGGCGCCGGCGG	L1_Gf:+:36	L1_Gf	36	probe_tm:91.45	experimental
AGCCGGCCACCTTCCTGGTGAGAGCACGGGGGTCTGCCCGGCCTGAGAGGTTTGTGGCACAGGCGCCGGCGG	L1_Gf:+:37	L1_Gf	37	probe_tm:91.17	experimental
GCCGGCCACCTTCCTGGTGAGAGCACGGGGGTCTGCCCGGCCTGAGAGGTTTGTGGCACAGGCGCCGGCGGGA	L1_Gf:+:38	L1_Gf	38	probe_tm:91.45	experimental
CCGGCCACCTTCCTGGTGAGAGCACGGGGGTCTGCCCGGCCTGAGAGGTTTGTGGCACAGGCGCCGGCGGGA	L1_Gf:+:39	L1_Gf	39	probe_tm:91.17	experimental
CGGCCACCTTCCTGGTGAGAGCACGGGGGTCTGCCCGGCCTGAGAGGTTTGTGGCACAGGCGCCGGCGGGAGC	L1_Gf:+:40	L1_Gf	40	probe_tm:91.45	experimental
GGTTGGGTGGCTATGGGGGACTTTTGGTATAGCATTGCAAATGTAAATGAGCGAAATACCTAATAAAAAA	L1_Gf:+:6683	L1_Gf	6683	probe_tm:77.14	experimental
GTTGGGTGGCTATGGGGGACTTTTGGTATAGCATTGCAAATGTAAATGAGCGAAATACCTAATAAAAAATGA	L1_Gf:+:6684	L1_Gf	6684	probe_tm:76.94	experimental
TTGGGTGGCTATGGGGGACTTTTGGTATAGCATTGCAAATGTAAATGAGCGAAATACCTAATAAAAAATGAA	L1_Gf:+:6685	L1_Gf	6685	probe_tm:76.37	experimental
TGGGTGGCTATGGGGGACTTTTGGTATAGCATTGCAAATGTAAATGAGCGAAATACCTAATAAAAAATGAAA	L1_Gf:+:6686	L1_Gf	6686	probe_tm:76.37	experimental
GGGTGGCTATGGGGGACTTTTGGTATAGCATTGCAAATGTAAATGAGCGAAATACCTAATAAAAAATGAAA	L1_Gf:+:6687	L1_Gf	6687	probe_tm:76.46	experimental
GGTGGCTATGGGGGACTTTTGGTATAGCATTGCAAATGTAAATGAGCGAAATACCTAATAAAAAATGAAAA	L1_Gf:+:6688	L1_Gf	6688	probe_tm:75.88	experimental
GTGGCTATGGGGGACTTTTGGTATAGCATTGCAAATGTAAATGAGCGAAATACCTAATAAAAAATGAAAAA	L1_Gf:+:6689	L1_Gf	6689	probe_tm:75.31	experimental
TGGCTATGGGGGACTTTTGGTATAGCATTGCAAATGTAAATGAGCGAAATACCTAATAAAAAATGAAAAAA	L1_Gf:+:6690	L1_Gf	6690	probe_tm:74.73	experimental
GGCTATGGGGGACTTTTGGTATAGCATTGCAAATGTAAATGAGCGAAATACCTAATAAAAAATGAAAAAA	L1_Gf:+:6691	L1_Gf	6691	probe_tm:74.80	experimental
GCTATGGGGGACTTTTGGTATAGCATTGCAAATGTAAATGAGCGAAATACCTAATAAAAAATGAAAAAAA	L1_Gf:+:6692	L1_Gf	6692	probe_tm:74.21	experimental
CTATGGGGGACTTTTGGTATAGCATTGCAAATGTAAATGAGCGAAATACCTAATAAAAAATGAAAAAAA	L1_Gf:+:6693	L1_Gf	6693	probe_tm:73.68	experimental
TATGGGGGACTTTTGGTATAGCATTGCAAATGTAAATGAGCGAAATACCTAATAAAAAATGAAAAAAAA	L1_Gf:+:6694	L1_Gf	6694	probe_tm:73.09	experimental
ATGGGGGACTTTTGGTATAGCATTGCAAATGTAAATGAGCGAAATACCTAATAAAAAATGAAAAAAAA	L1_Gf:+:6695	L1_Gf	6695	probe_tm:73.13	experimental
TGGGGGACTTTTGGTATAGCATTGCAAATGTAAATGAGCGAAATACCTAATAAAAAATGAAAAAAAAA	L1_Gf:+:6696	L1_Gf	6696	probe_tm:73.13	experimental
GGGGGACTTTTGGTATAGCATTGCAAATGTAAATGAGCGAAATACCTAATAAAAAATGAAAAAAAAA	L1_Gf:+:6697	L1_Gf	6697	probe_tm:73.18	experimental
GGGGACTTTTGGTATAGCATTGCAAATGTAAATGAGCGAAATACCTAATAAAAAATGAAAAAAAAAA	L1_Gf:+:6698	L1_Gf	6698	probe_tm:72.57	experimental
GGGACTTTTGGTATAGCATTGCAAATGTAAATGAGCGAAATACCTAATAAAAAATGAAAAAAAAAATA	L1_Gf:+:6699	L1_Gf	6699	probe_tm:71.93	experimental
GGACTTTTGGTATAGCATTGCAAATGTAAATGAGCGAAATACCTAATAAAAAATGAAAAAAAAAATAA	L1_Gf:+:6700	L1_Gf	6700	probe_tm:71.32	experimental
GACTTTTGGTATAGCATTGCAAATGTAAATGAGCGAAATACCTAATAAAAAATGAAAAAAAAAATAAA	L1_Gf:+:6701	L1_Gf	6701	probe_tm:70.72	experimental
ACTTTTGGTATAGCATTGCAAATGTAAATGAGCGAAATACCTAATAAAAAATGAAAAAAAAAATAAA	L1_Gf:+:6702	L1_Gf	6702	probe_tm:70.12	experimental
CTTTTGGTATAGCATTGCAAATGTAAATGAGCGAAATACCTAATAAAAAATGAAAAAAAAAATAAAA	L1_Gf:+:6703	L1_Gf	6703	probe_tm:70.12	experimental
TTTTGGTATAGCATTGCAAATGTAAATGAGCGAAATACCTAATAAAAAATGAAAAAAAAAATAAAATC	L1_Gf:+:6704	L1_Gf	6704	probe_tm:70.12	experimental
TTTGGTATAGCATTGCAAATGTAAATGAGCGAAATACCTAATAAAAAATGAAAAAAAAAATAAAATC	L1_Gf:+:6705	L1_Gf	6705	probe_tm:70.12	experimental
TTGGTATAGCATTGCAAATGTAAATGAGCGAAATACCTAATAAAAAATGAAAAAAAAAATAAAATC	L1_Gf:+:6706	L1_Gf	6706	probe_tm:70.12	experimental
TGGTATAGCATTGCAAATGTAAATGAGCGAAATACCTAATAAAAAATGAAAAAAAAAATAAAATC	L1_Gf:+:6707	L1_Gf	6707	probe_tm:70.13	experimental
GGTATAGCATTGCAAATGTAAATGAGCGAAATACCTAATAAAAAATGAAAAAAAAAATAAAATC	L1_Gf:+:6708	L1_Gf	6708	probe_tm:70.13	experimental
GTATAGCATTGCAAATGTAAATGAGCGAAATACCTAATAAAAAATGAAAAAAAAAATAAAATC	L1_Gf:+:6709	L1_Gf	6709	probe_tm:69.48	experimental
TATAGCATTGCAAATGTAAATGAGCGAAATACCTAATAAAAAATGAAAAAAAAAATAAAATC	L1_Gf:+:6710	L1_Gf	6710	probe_tm:68.82	experimental
ATAGCATTGCAAATGTAAATGAGCGAAATACCTAATAAAAAATGAAAAAAAAAATAAAATC	L1_Gf:+:6711	L1_Gf	6711	probe_tm:68.80	experimental
TAGCATTGCAAATGTAAATGAGCGAAATACCTAATAAAAAATGAAAAAAAAAATAAAATC	L1_Gf:+:6712	L1_Gf	6712	probe_tm:68.78	experimental
AGCATTGCAAATGTAAATGAGCGAAATACCTAATAAAAAATGAAAAAAAAAATAAAATC	L1_Gf:+:6713	L1_Gf	6713	probe_tm:68.76	experimental
GCATTGCAAATGTAAATGAGCGAAATACCTAATAAAAAATGAAAAAAAAAATAAAATC	L1_Gf:+:6714	L1_Gf	6714	probe_tm:68.74	experimental
CATTGCAAATGTAAATGAGCGAAATACCTAATAAAAAATGAAAAAAAAAATAAAATC	L1_Gf:+:6715	L1_Gf	6715	probe_tm:68.00	experimental
ATTGCAAATGTAAATGAGCGAAATACCTAATAAAAAATGAAAAAAAAAATAAAATC	L1_Gf:+:6716	L1_Gf	6716	probe_tm:67.24	experimental
TTGCAAATGTAAATGAGCGAAATACCTAATAAAAAATGAAAAAAAAAATAAAATC	L1_Gf:+:6717	L1_Gf	6717	probe_tm:67.19	experimental
TGCAAATGTAAATGAGCGAAATACCTAATAAAAAATGAAAAAAAAAATAAAATC	L1_Gf:+:6718	L1_Gf	6718	probe_tm:67.14	experimental
GCAAATGTAAATGAGCGAAATACCTAATAAAAAATGAAAAAAAAAATAAAATC	L1_Gf:+:6719	L1_Gf	6719	probe_tm:67.09	experimental
CAAATGTAAATGAGCGAAATACCTAATAAAAAATGAAAAAAAAAATAAAATC	L1_Gf:+:6720	L1_Gf	6720	probe_tm:66.24	experimental
AAATGTAAATGAGCGAAATACCTAATAAAAAATGAAAAAAAAAATAAAATC	L1_Gf:+:6721	L1_Gf	6721	probe_tm:65.37	experimental
AATGTAAATGAGCGAAATACCTAATAAAAAATGAAAAAAAAAATAAAATC	L1_Gf:+:6722	L1_Gf	6722	probe_tm:65.28	experimental
CAGCGGTCGCCATCTTGGTCCGAGACCCGCCGAACTTAGGAAATTAGTCTGAACAGGTGAGAGGGTGCGCCAGA	L1_Tf:+:1	L1_Tf	1	probe_tm:85.61	experimental
AGCGGTCGCCATCTTGGTCCGAGACCCGCCGAACTTAGGAAATTAGTCTGAACAGGTGAGAGGGTGCGCCAGA	L1_Tf:+:2	L1_Tf	2	probe_tm:85.27	experimental
GCGGTCGCCATCTTGGTCCGAGACCCGCCGAACTTAGGAAATTAGTCTGAACAGGTGAGAGGGTGCGCCAGAGA	L1_Tf:+:3	L1_Tf	3	probe_tm:85.61	experimental
CGGTCGCCATCTTGGTCCGAGACCCGCCGAACTTAGGAAATTAGTCTGAACAGGTGAGAGGGTGCGCCAGAGA	L1_Tf:+:4	L1_Tf	4	probe_tm:85.27	experimental
GGTCGCCATCTTGGTCCGAGACCCGCCGAACTTAGGAAATTAGTCTGAACAGGTGAGAGGGTGCGCCAGAGAA	L1_Tf:+:5	L1_Tf	5	probe_tm:84.71	experimental
GTCGCCATCTTGGTCCGAGACCCGCCGAACTTAGGAAATTAGTCTGAACAGGTGAGAGGGTGCGCCAGAGAAC	L1_Tf:+:6	L1_Tf	6	probe_tm:84.71	experimental
TCGCCATCTTGGTCCGAGACCCGCCGAACTTAGGAAATTAGTCTGAACAGGTGAGAGGGTGCGCCAGAGAACC	L1_Tf:+:7	L1_Tf	7	probe_tm:84.71	experimental
CGCCATCTTGGTCCGAGACCCGCCGAACTTAGGAAATTAGTCTGAACAGGTGAGAGGGTGCGCCAGAGAACC	L1_Tf:+:8	L1_Tf	8	probe_tm:84.91	experimental
GCCATCTTGGTCCGAGACCCGCCGAACTTAGGAAATTAGTCTGAACAGGTGAGAGGGTGCGCCAGAGAACCTGA	L1_Tf:+:9	L1_Tf	9	probe_tm:84.51	experimental
CCATCTTGGTCCGAGACCCGCCGAACTTAGGAAATTAGTCTGAACAGGTGAGAGGGTGCGCCAGAGAACCTGA	L1_Tf:+:10	L1_Tf	10	probe_tm:84.14	experimental
CATCTTGGTCCGAGACCCGCCGAACTTAGGAAATTAGTCTGAACAGGTGAGAGGGTGCGCCAGAGAACCTGACA	L1_Tf:+:11	L1_Tf	11	probe_tm:83.95	experimental
ATCTTGGTCCGAGACCCGCCGAACTTAGGAAATTAGTCTGAACAGGTGAGAGGGTGCGCCAGAGAACCTGACA	L1_Tf:+:12	L1_Tf	12	probe_tm:83.58	experimental
TCTTGGTCCGAGACCCGCCGAACTTAGGAAATTAGTCTGAACAGGTGAGAGGGTGCGCCAGAGAACCTGACAGC	L1_Tf:+:13	L1_Tf	13	probe_tm:84.51	experimental
CTTGGTCCGAGACCCGCCGAACTTAGGAAATTAGTCTGAACAGGTGAGAGGGTGCGCCAGAGAACCTGACAGC	L1_Tf:+:14	L1_Tf	14	probe_tm:84.71	experimental
TTGGTCCGAGACCCGCCGAACTTAGGAAATTAGTCTGAACAGGTGAGAGGGTGCGCCAGAGAACCTGACAGCC	L1_Tf:+:15	L1_Tf	15	probe_tm:84.71	experimental
TGGTCCGAGACCCGCCGAACTTAGGAAATTAGTCTGAACAGGTGAGAGGGTGCGCCAGAGAACCTGACAGCCTC	L1_Tf:+:16	L1_Tf	16	probe_tm:85.06	experimental
GGTCCGAGACCCGCCGAACTTAGGAAATTAGTCTGAACAGGTGAGAGGGTGCGCCAGAGAACCTGACAGCCTC	L1_Tf:+:17	L1_Tf	17	probe_tm:85.27	experimental
GTCCGAGACCCGCCGAACTTAGGAAATTAGTCTGAACAGGTGAGAGGGTGCGCCAGAGAACCTGACAGCCTCTG	L1_Tf:+:18	L1_Tf	18	probe_tm:85.06	experimental
TCCGAGACCCGCCGAACTTAGGAAATTAGTCTGAACAGGTGAGAGGGTGCGCCAGAGAACCTGACAGCCTCTGGA	L1_Tf:+:19	L1_Tf	19	probe_tm:84.86	experimental
CCGAGACCCGCCGAACTTAGGAAATTAGTCTGAACAGGTGAGAGGGTGCGCCAGAGAACCTGACAGCCTCTGGA	L1_Tf:+:20	L1_Tf	20	probe_tm:85.06	experimental
CGAGACCCGCCGAACTTAGGAAATTAGTCTGAACAGGTGAGAGGGTGCGCCAGAGAACCTGACAGCCTCTGGAA	L1_Tf:+:21	L1_Tf	21	probe_tm:84.51	experimental
GAGACCCGCCGAACTTAGGAAATTAGTCTGAACAGGTGAGAGGGTGCGCCAGAGAACCTGACAGCCTCTGGAACA	L1_Tf:+:22	L1_Tf	22	probe_tm:84.31	experimental
AGACCCGCCGAACTTAGGAAATTAGTCTGAACAGGTGAGAGGGTGCGCCAGAGAACCTGACAGCCTCTGGAACA	L1_Tf:+:23	L1_Tf	23	probe_tm:83.95	experimental
GACCCGCCGAACTTAGGAAATTAGTCTGAACAGGTGAGAGGGTGCGCCAGAGAACCTGACAGCCTCTGGAACAG	L1_Tf:+:24	L1_Tf	24	probe_tm:84.51	experimental
ACCCGCCGAACTTAGGAAATTAGTCTGAACAGGTGAGAGGGTGCGCCAGAGAACCTGACAGCCTCTGGAACAG	L1_Tf:+:25	L1_Tf	25	probe_tm:84.14	experimental
CCCGCCGAACTTAGGAAATTAGTCTGAACAGGTGAGAGGGTGCGCCAGAGAACCTGACAGCCTCTGGAACAGGCA	L1_Tf:+:26	L1_Tf	26	probe_tm:84.86	experimental
CCGCCGAACTTAGGAAATTAGTCTGAACAGGTGAGAGGGTGCGCCAGAGAACCTGACAGCCTCTGGAACAGGCAGA	L1_Tf:+:27	L1_Tf	27	probe_tm:84.66	experimental
CGCCGAACTTAGGAAATTAGTCTGAACAGGTGAGAGGGTGCGCCAGAGAACCTGACAGCCTCTGGAACAGGCAGAA	L1_Tf:+:28	L1_Tf	28	probe_tm:84.12	experimental
GCCGAACTTAGGAAATTAGTCTGAACAGGTGAGAGGGTGCGCCAGAGAACCTGACAGCCTCTGGAACAGGCAGAAGCA	L1_Tf:+:29	L1_Tf	29	probe_tm:84.28	experimental
CCGAACTTAGGAAATTAGTCTGAACAGGTGAGAGGGTGCGCCAGAGAACCTGACAGCCTCTGGAACAGGCAGAAGCA	L1_Tf:+:30	L1_Tf	30	probe_tm:83.94	experimental
CGAACTTAGGAAATTAGTCTGAACAGGTGAGAGGGTGCGCCAGAGAACCTGACAGCCTCTGGAACAGGCAGAAGCACA	L1_Tf:+:31	L1_Tf	31	probe_tm:83.76	experimental
GAACTTAGGAAATTAGTCTGAACAGGTGAGAGGGTGCGCCAGAGAACCTGACAGCCTCTGGAACAGGCAGAAGCACAGA	L1_Tf:+:32	L1_Tf	32	probe_tm:83.58	experimental
AACTTAGGAAATTAGTCTGAACAGGTGAGAGGGTGCGCCAGAGAACCTGACAGCCTCTGGAACAGGCAGAAGCACAGA	L1_Tf:+:33	L1_Tf	33	probe_tm:83.23	experimental
ACTTAGGAAATTAGTCTGAACAGGTGAGAGGGTGCGCCAGAGAACCTGACAGCCTCTGGAACAGGCAGAAGCACAGAG	L1_Tf:+:34	L1_Tf	34	probe_tm:83.76	experimental
CTTAGGAAATTAGTCTGAACAGGTGAGAGGGTGCGCCAGAGAACCTGACAGCCTCTGGAACAGGCAGAAGCACAGAGGC	L1_Tf:+:35	L1_Tf	35	probe_tm:84.62	experimental
TTAGGAAATTAGTCTGAACAGGTGAGAGGGTGCGCCAGAGAACCTGACAGCCTCTGGAACAGGCAGAAGCACAGAGGCGC	L1_Tf:+:36	L1_Tf	36	probe_tm:84.95	experimental
TAGGAAATTAGTCTGAACAGGTGAGAGGGTGCGCCAGAGAACCTGACAGCCTCTGGAACAGGCAGAAGCACAGAGGCGCTGA	L1_Tf:+:37	L1_Tf	37	probe_tm:85.08	experimental
AGGAAATTAGTCTGAACAGGTGAGAGGGTGCGCCAGAGAACCTGACAGCCTCTGGAACAGGCAGAAGCACAGAGGCGCTGA	L1_Tf:+:38	L1_Tf	38	probe_tm:85.27	experimental
GGAAATTAGTCTGAACAGGTGAGAGGGTGCGCCAGAGAACCTGACAGCCTCTGGAACAGGCAGAAGCACAGAGGCGCTGAG	L1_Tf:+:39	L1_Tf	39	probe_tm:85.77	experimental
GAAATTAGTCTGAACAGGTGAGAGGGTGCGCCAGAGAACCTGACAGCCTCTGGAACAGGCAGAAGCACAGAGGCGCTGAGGCA	L1_Tf:+:40	L1_Tf	40	probe_tm:85.89	experimental
AGTGGGTGGGTAGGGGAGTGGGGGTGGGTGGGTAAGGGGGACTTTTGGTATAGCATTGGAAATG	L1_Tf:+:6544	L1_Tf	6544	probe_tm:83.58	experimental
GTGGGTGGGTAGGGGAGTGGGGGTGGGTGGGTAAGGGGGACTTTTGGTATAGCATTGGAAATGTA	L1_Tf:+:6545	L1_Tf	6545	probe_tm:83.37	experimental
TGGGTGGGTAGGGGAGTGGGGGTGGGTGGGTAAGGGGGACTTTTGGTATAGCATTGGAAATGTAA	L1_Tf:+:6546	L1_Tf	6546	probe_tm:82.74	experimental
GGGTGGGTAGGGGAGTGGGGGTGGGTGGGTAAGGGGGACTTTTGGTATAGCATTGGAAATGTAA	L1_Tf:+:6547	L1_Tf	6547	probe_tm:82.94	experimental
GGTGGGTAGGGGAGTGGGGGTGGGTGGGTAAGGGGGACTTTTGGTATAGCATTGGAAATGTAAA	L1_Tf:+:6548	L1_Tf	6548	probe_tm:82.30	experimental
GTGGGTAGGGGAGTGGGGGTGGGTGGGTAAGGGGGACTTTTGGTATAGCATTGGAAATGTAAATGA	L1_Tf:+:6549	L1_Tf	6549	probe_tm:81.93	experimental
TGGGTAGGGGAGTGGGGGTGGGTGGGTAAGGGGGACTTTTGGTATAGCATTGGAAATGTAAATGAGC	L1_Tf:+:6550	L1_Tf	6550	probe_tm:82.36	experimental
GGGTAGGGGAGTGGGGGTGGGTGGGTAAGGGGGACTTTTGGTATAGCATTGGAAATGTAAATGAGC	L1_Tf:+:6551	L1_Tf	6551	probe_tm:82.55	experimental
GGTAGGGGAGTGGGGGTGGGTGGGTAAGGGGGACTTTTGGTATAGCATTGGAAATGTAAATGAGCTA	L1_Tf:+:6552	L1_Tf	6552	probe_tm:81.75	experimental
GTAGGGGAGTGGGGGTGGGTGGGTAAGGGGGACTTTTGGTATAGCATTGGAAATGTAAATGAGCTAA	L1_Tf:+:6553	L1_Tf	6553	probe_tm:81.14	experimental
TAGGGGAGTGGGGGTGGGTGGGTAAGGGGGACTTTTGGTATAGCATTGGAAATGTAAATGAGCTAAA	L1_Tf:+:6554	L1_Tf	6554	probe_tm:80.52	experimental
AGGGGAGTGGGGGTGGGTGGGTAAGGGGGACTTTTGGTATAGCATTGGAAATGTAAATGAGCTAAA	L1_Tf:+:6555	L1_Tf	6555	probe_tm:80.68	experimental
GGGGAGTGGGGGTGGGTGGGTAAGGGGGACTTTTGGTATAGCATTGGAAATGTAAATGAGCTAAATA	L1_Tf:+:6556	L1_Tf	6556	probe_tm:80.52	experimental
GGGAGTGGGGGTGGGTGGGTAAGGGGGACTTTTGGTATAGCATTGGAAATGTAAATGAGCTAAATAC	L1_Tf:+:6557	L1_Tf	6557	probe_tm:80.52	experimental
GGAGTGGGGGTGGGTGGGTAAGGGGGACTTTTGGTATAGCATTGGAAATGTAAATGAGCTAAATACC	L1_Tf:+:6558	L1_Tf	6558	probe_tm:80.52	experimental
GAGTGGGGGTGGGTGGGTAAGGGGGACTTTTGGTATAGCATTGGAAATGTAAATGAGCTAAATACCTA	L1_Tf:+:6559	L1_Tf	6559	probe_tm:79.76	experimental
AGTGGGGGTGGGTGGGTAAGGGGGACTTTTGGTATAGCATTGGAAATGTAAATGAGCTAAATACCTA	L1_Tf:+:6560	L1_Tf	6560	probe_tm:79.30	experimental
GTGGGGGTGGGTGGGTAAGGGGGACTTTTGGTATAGCATTGGAAATGTAAATGAGCTAAATACCTAA	L1_Tf:+:6561	L1_Tf	6561	probe_tm:79.30	experimental
TGGGGGTGGGTGGGTAAGGGGGACTTTTGGTATAGCATTGGAAATGTAAATGAGCTAAATACCTAATA	L1_Tf:+:6562	L1_Tf	6562	probe_tm:78.56	experimental
GGGGGTGGGTGGGTAAGGGGGACTTTTGGTATAGCATTGGAAATGTAAATGAGCTAAATACCTAATA	L1_Tf:+:6563	L1_Tf	6563	probe_tm:78.69	experimental
GGGGTGGGTGGGTAAGGGGGACTTTTGGTATAGCATTGGAAATGTAAATGAGCTAAATACCTAATAA	L1_Tf:+:6564	L1_Tf	6564	probe_tm:78.08	experimental
GGGTGGGTGGGTAAGGGGGACTTTTGGTATAGCATTGGAAATGTAAATGAGCTAAATACCTAATAAA	L1_Tf:+:6565	L1_Tf	6565	probe_tm:77.46	experimental
GGTGGGTGGGTAAGGGGGACTTTTGGTATAGCATTGGAAATGTAAATGAGCTAAATACCTAATAAAA	L1_Tf:+:6566	L1_Tf	6566	probe_tm:76.85	experimental
GTGGGTGGGTAAGGGGGACTTTTGGTATAGCATTGGAAATGTAAATGAGCTAAATACCTAATAAAA	L1_Tf:+:6567	L1_Tf	6567	probe_tm:76.34	experimental
TGGGTGGGTAAGGGGGACTTTTGGTATAGCATTGGAAATGTAAATGAGCTAAATACCTAATAAAA	L1_Tf:+:6568	L1_Tf	6568	probe_tm:75.80	experimental
GGGTGGGTAAGGGGGACTTTTGGTATAGCATTGGAAATGTAAATGAGCTAAATACCTAATAAAA	L1_Tf:+:6569	L1_Tf	6569	probe_tm:75.90	experimental
GGTGGGTAAGGGGGACTTTTGGTATAGCATTGGAAATGTAAATGAGCTAAATACCTAATAAAA	L1_Tf:+:6570	L1_Tf	6570	probe_tm:75.34	experimental
GTGGGTAAGGGGGACTTTTGGTATAGCATTGGAAATGTAAATGAGCTAAATACCTAATAAAA	L1_Tf:+:6571	L1_Tf	6571	probe_tm:74.77	experimental
TGGGTAAGGGGGACTTTTGGTATAGCATTGGAAATGTAAATGAGCTAAATACCTAATAAAA	L1_Tf:+:6572	L1_Tf	6572	probe_tm:74.18	experimental
GGGTAAGGGGGACTTTTGGTATAGCATTGGAAATGTAAATGAGCTAAATACCTAATAAAA	L1_Tf:+:6573	L1_Tf	6573	probe_tm:74.25	experimental
GGTAAGGGGGACTTTTGGTATAGCATTGGAAATGTAAATGAGCTAAATACCTAATAAAA	L1_Tf:+:6574	L1_Tf	6574	probe_tm:73.63	experimental
GTAAGGGGGACTTTTGGTATAGCATTGGAAATGTAAATGAGCTAAATACCTAATAAAA	L1_Tf:+:6575	L1_Tf	6575	probe_tm:72.98	experimental
TAAGGGGGACTTTTGGTATAGCATTGGAAATGTAAATGAGCTAAATACCTAATAAAA	L1_Tf:+:6576	L1_Tf	6576	probe_tm:72.32	experimental
AAGGGGGACTTTTGGTATAGCATTGGAAATGTAAATGAGCTAAATACCTAATAAAA	L1_Tf:+:6577	L1_Tf	6577	probe_tm:72.36	experimental
AGGGGGACTTTTGGTATAGCATTGGAAATGTAAATGAGCTAAATACCTAATAAAA	L1_Tf:+:6578	L1_Tf	6578	probe_tm:72.41	experimental
GGGGGACTTTTGGTATAGCATTGGAAATGTAAATGAGCTAAATACCTAATAAAA	L1_Tf:+:6579	L1_Tf	6579	probe_tm:72.45	experimental
GGGGACTTTTGGTATAGCATTGGAAATGTAAATGAGCTAAATACCTAATAAAA	L1_Tf:+:6580	L1_Tf	6580	probe_tm:71.73	experimental
GGGACTTTTGGTATAGCATTGGAAATGTAAATGAGCTAAATACCTAATAAAA	L1_Tf:+:6581	L1_Tf	6581	probe_tm:70.97	experimental
GGACTTTTGGTATAGCATTGGAAATGTAAATGAGCTAAATACCTAATAAAA	L1_Tf:+:6582	L1_Tf	6582	probe_tm:70.19	experimental
GACTTTTGGTATAGCATTGGAAATGTAAATGAGCTAAATACCTAATAAAA	L1_Tf:+:6583	L1_Tf	6583	probe_tm:69.38	experimental
