# Supplementary material for: Heritable L1 retrotransposition in the mouse primordial germline and early embryo
Source: Genome Res. 2017 Aug;27(8):1395–405. doi: 10.1101/gr.219022.116 (PMC5538555; doi:10.1101/gr.219022.116)
Supplement: Supplemental Material [file supp_gr.219022.116_Supplemental_table_2.xlsx]

## Sheet: De Novo Insertions
Supplemental Table 2. De novo (first tab) and polymorphic (second tab) retroelement insertions identified. The first 8 columns present the details of the genomic location of each insertion. The ninth column, “Nellaker et al.” is of particular interest, as it indicates whether each insertion site was identified in a previous study wherein the genomes of commonly-used 13 inbred and 4 wild-derived m…
Chr	Insertion Name	Sense stop	Antisense start	Family	Location	RefSeq	Gene	Nellåker et al.	Other mRC-seq	SRA	SRB	SRAB1	SRAB2	SRAB3	SRAB4	SRAB5	SRAB6	SRAB7	SRAB8	SRAB9	SRAB10	SRAB11	SRAB12	SRAB13	SRAB14	SRAB15	SRAB16	SRAB17	SRAB18	SRAB19	SRAB20	SRC	SRD	SRCD10	SRCD11	SRCD12	SRCD13	SRCD14	SRCD14_LT	SRCD14_RT	SRE	SRE.WGS	SRF	SRF.WGS	SREF15	SREF15.WGS	SREF16	SREF16.WGS	SREF17
chr12	Insertion #1	109324414	''	L1MdTf_I	intergenic	''	''	''	0	0	0	0	17	0	0	0	1	0	0	0	0	0	0	0	0	0	0	0	0	0	0	0	0	0	0	0	0	0	0	0	0	0	0	0	0	0	0	0	0
chr2	Insertion #2	''	101251997	L1MdTf_I	intergenic	''	''	''	0	0	0	0	0	0	0	0	0	0	0	0	0	0	0	0	0	3	0	0	0	0	0	0	0	0	0	0	0	0	0	0	0	0	0	0	0	0	0	0	0
chr10	Insertion #3	''	55125882	L1MdTf_II	intergenic	''	''	''	0	0	0	0	0	0	0	0	0	0	0	0	1	1	0	0	0	0	3	0	0	0	0	0	0	0	0	0	0	0	0	0	0	0	0	0	0	0	0	0	0
chr3	Insertion #4	81424445	''	L1MdTf_I	intergenic	''	''	''	0	0	0	0	0	0	0	0	0	0	0	0	0	0	0	0	0	0	0	0	0	0	0	0	0	0	0	0	0	0	0	0	0	0	0	0	0	0	46	13	1
chr10	Insertion #5	89133412	89133397	L1MdTf_I	intronic	NM_178773	Ano4	''	0	0	0	0	0	0	0	0	0	0	0	0	0	0	0	0	0	0	0	0	0	0	0	0	0	1	0	0	1	0	0	0	0	0	0	0	0	0	49	12	0
chr14	Insertion #6	''	107023819	L1MdTf_I	intergenic	''	''	''	0	0	0	0	0	0	0	0	0	0	0	0	0	0	0	0	0	0	0	0	0	0	0	0	0	0	0	0	0	0	0	0	0	0	0	0	0	0	0	0	0
chr18	Insertion #7	''	85067454	L1MdTf_II	intergenic	''	''	"	0	0	0	0	0	0	0	0	0	0	0	0	0	0	0	0	0	0	0	0	0	0	0	0	0	0	0	0	0	0	13	2	0	0	0	0	0	0	0	0	0
chr17	Insertion #8	54164887	''	L1MdTf_I	intergenic	''	''	''	0	0	0	0	0	0	0	0	0	0	0	0	0	0	0	0	0	0	0	0	0	0	0	0	0	0	0	0	0	0	0	0	0	0	0	0	0	0	0	0	6
chr2	Insertion #9	''	65072087	L1MdTf_II	intergenic	''	''	''	0	0	0	0	0	0	0	0	0	0	0	0	0	0	0	0	0	0	0	0	0	0	0	0	0	0	0	0	0	0	0	0	0	0	0	0	0	0	0	0	0
chr3	Insertion #10	''	11610298	L1MdTf_I	intergenic	''	''	''	0	0	0	0	0	0	0	0	0	0	0	0	0	0	0	0	0	0	0	0	0	0	0	0	0	0	0	0	0	0	0	0	0	0	0	0	0	0	0	0	0
chr8	Insertion #11	63990930	''	L1MdTf_II	intergenic	''	''	''	0	0	0	0	0	0	0	0	0	0	0	0	2	0	1	0	1	0	0	1	0	0	0	0	0	0	0	0	0	0	0	0	0	0	0	0	0	0	0	0	0
[truncated: 86 more columns]

## Sheet: Polymorphic Insertions
Chr	Name in Supplemental Table 3	Sense stop	Antisense start	Family	Location	RefSeq	Gene	Nellåker et al.	Other mRC-seq	SRA	SRB	SRAB1	SRAB2	SRAB3	SRAB4	SRAB5	SRAB6	SRAB7	SRAB8	SRAB9	SRAB10	SRAB11	SRAB12	SRAB13	SRAB14	SRAB15	SRAB16	SRAB17	SRAB18	SRAB19	SRAB20	SRC	SRD	SRCD10	SRCD11	SRCD12	SRCD13	SRCD14	SRCD14_LT	SRCD14_RT	SRE	SRE.WGS	SRF	SRF.WGS	SREF15	SREF15.WGS	SREF16	SREF16.WGS	SREF17
chr16	Poly_B1_1	91599070	91599057	B1	intergenic	''	''	''	0	0	0	0	0	0	0	0	0	0	0	0	0	0	0	0	0	0	0	0	0	0	0	0	24	2	11	2	11	15	16	11	1	0	0	0	0	0	0	0	0
chrX	Poly_B2_1	41903742	41903726	B2	intronic	NM_001033422	Thoc2	''	27	14	0	0	22	15	0	0	0	18	0	0	12	9	4	6	4	4	6	9	13	8	6	38	21	3	36	17	8	16	76	84	57	11	20	5	11	8	41	6	24
chr5	Poly_B2_2	98060057	98060041	B2	intergenic	''	''	''	0	8	9	0	17	20	3	15	0	13	16	4	5	7	7	10	4	8	7	5	9	0	6	0	0	0	0	0	0	0	0	0	0	0	0	0	0	0	0	0	0
chr15	Poly_L1TF_1	46188040	''	L1MdTf_I	intergenic	''	''	''	0	0	0	0	0	0	0	0	0	0	0	0	0	0	0	0	0	0	0	0	0	0	0	25	0	3	26	34	6	13	130	141	0	0	0	0	0	0	0	0	0
chr6	Poly_L1TF_3	108844492	''	L1MdTf_I	intronic	NM_138677	Edem1	''	0	0	11	0	8	0	0	17	12	0	0	7	0	0	2	1	4	0	0	0	1	0	3	0	0	0	0	0	0	0	0	0	0	0	0	0	0	0	0	0	0
chr17	Poly_L1TF_4	41334129	''	L1MdTf_II	intergenic	''	''	''	0	0	0	0	0	0	0	0	0	0	0	0	0	0	0	0	0	0	0	0	0	0	0	0	30	3	0	6	1	1	0	0	31	7	0	0	32	24	20	11	0
chr1	Poly_L1TF_5	''	104818660	L1MdTf_II	intronic	NM_011800	Cdh20	''	0	0	32	0	39	2	1	0	0	33	43	13	3	0	5	0	0	6	0	4	7	0	0	0	0	0	0	0	0	0	0	0	0	0	0	0	0	0	0	0	0
chr10	Poly_L1TF_10	36022486	36022472	L1MdTf_I	intergenic	''	''	''	21	40	21	14	24	36	20	28	31	24	23	16	14	23	21	19	21	37	35	21	33	21	34	54	65	17	32	46	22	38	215	241	69	9	25	18	107	44	76	9	105
chr5	Poly_L1TF_12	69153936	69153918	L1MdTf_I	intronic	NM_175519	Kctd8	''	21	11	15	5	18	23	4	36	28	11	11	11	12	15	14	11	7	16	12	14	14	6	7	55	49	13	29	50	15	40	178	198	51	9	26	12	112	32	64	21	82
chr7	Poly_L1TF_19	62347358	62347340	L1MdTf_II	intergenic	''	''	''	8	23	27	13	28	35	27	32	28	40	24	6	24	24	20	33	19	26	40	39	36	22	27	67	76	13	50	48	13	52	225	237	81	12	43	17	100	47	72	16	95
chr15	Poly_L1TF_11	45572177	''	L1MdTf_I	intergenic	''	''	''	30	46	30	13	30	29	29	35	29	28	32	16	27	23	18	25	22	18	32	31	32	17	19	62	70	20	44	51	10	51	184	228	70	15	25	17	98	39	68	13	75
chr11	Poly_L1TF_14	91759583	''	L1MdTf_II	intergenic	''	''	LINE|SPRET	0	0	12	5	0	0	14	21	6	11	0	0	1	0	0	1	0	2	1	0	0	0	1	0	0	0	0	0	0	0	0	0	0	0	0	0	0	0	0	0	0
chr12	Poly_L1TF_15	64779640	''	L1MdTf_II	intergenic	''	''	''	0	29	0	15	0	22	1	1	16	0	0	10	17	13	10	8	9	24	17	14	17	5	13	0	0	0	0	0	0	0	0	0	0	0	0	0	0	0	0	0	0
chr4	Poly_L1TF_18	147497704	147497685	L1MdTf_II	intronic	NM_001039209	Gm13152	''	299	48	40	19	44	45	33	48	31	44	54	19	30	40	32	18	22	34	43	58	48	22	37	86	83	23	45	83	22	58	210	219	92	22	56	22	105	85	75	32	107
chr2	Poly_L1TF_17	97440614	''	L1MdTf_II	intergenic	''	''	''	0	0	0	0	0	0	0	0	0	0	0	0	0	0	0	0	0	0	0	0	0	0	0	0	13	0	0	0	0	0	0	0	0	0	0	0	0	0	0	0	0
chr4	Poly_B1_2	146430150	146430138	B1	intronic	NM_001083918	Gm13139	''	48	7	2	2	15	19	2	20	20	16	13	2	4	4	3	4	3	4	5	5	4	2	4	11	13	2	21	17	16	27	67	63	12	7	24	9	11	0	11	1	10
chr4	Poly_B2_3	146493204	146493190	B2	intergenic	''	''	''	294	29	34	16	15	30	30	17	18	23	18	12	24	28	21	16	24	30	33	28	33	14	19	35	44	9	27	30	26	33	166	167	40	19	29	18	16	6	45	12	40
chr9	Poly_B2_4	69742283	69742273	B2	intergenic	''	''	''	37	30	21	10	37	39	14	34	38	27	32	6	23	23	10	20	17	19	27	27	33	11	27	46	50	25	28	31	22	31	140	147	50	7	31	9	14	4	34	4	40
chrX	Poly_L1TF_20	''	53690624	L1MdTf_II	intronic	NM_027700	4933416I08Rik	''	10	4	1	3	2	8	3	3	6	2	1	0	3	0	2	3	2	3	3	3	11	1	5	4	2	6	10	5	10	5	32	22	11	16	3	10	6	4	5	11	6
chr2	Poly_L1TF_2	''	89043332	L1MdTf_I	intergenic	''	''	''	0	0	0	0	0	0	0	0	0	0	0	0	0	0	0	0	0	0	0	0	0	0	0	0	0	0	0	0	0	0	0	0	26	4	0	0	42	17	0	1	0
chr3	Poly_L1TF_7	82396389	''	L1MdTf_II	intergenic	''	''	''	0	1	4	0	0	6	7	6	9	0	10	3	2	0	1	1	0	0	0	0	0	0	2	0	0	0	0	0	0	0	0	0	0	0	9	6	9	5	13	3	13
chr9	Poly_L1TF_8	''	74843783	L1MdTf_II	intergenic	''	''	''	0	0	0	0	0	0	0	0	0	0	0	0	0	0	0	0	0	0	0	0	0	0	0	5	0	0	1	3	3	1	9	8	0	0	0	0	0	0	0	0	0
chr10	Poly_L1GF_1	''	7460598	L1MdGf_I	intronic	NM_029975	Ulbp1	''	14	5	0	1	2	1	2	1	1	2	1	0	3	2	5	4	4	1	2	2	5	3	3	2	5	5	5	6	6	12	45	35	6	21	2	19	5	17	5	21	5
chr3	validation not attempted	''	49167686	L1MdTf_II	intergenic	''	''	''	14	10	0	3	19	0	17	20	12	17	17	8	9	9	2	5	11	5	16	16	15	7	16	33	61	20	29	35	13	33	128	134	54	16	1	0	36	25	34	8	43
chr4	validation not attempted	145430560	''	B2	intergenic	''	''	''	13	8	9	5	2	1	3	0	0	1	0	0	3	2	1	3	4	3	6	3	12	0	5	11	5	0	3	0	2	3	3	5	8	1	5	1	0	0	2	0	2
chrX	validation not attempted	22401308	''	B2	intergenic	''	''	''	251	15	14	7	22	12	17	18	14	28	15	12	15	18	10	9	13	29	22	10	17	11	11	25	40	9	31	18	21	29	102	106	34	15	18	14	14	3	40	5	46
chr18	validation not attempted	''	3005432	B1	intergenic	''	''	''	20	6	5	3	2	3	1	2	3	1	1	2	4	5	4	4	1	4	2	3	6	1	4	7	4	1	2	4	0	5	7	5	7	1	8	2	4	3	5	0	5
chr2	validation not attempted	''	181917686	B2	intergenic	''	''	''	74	19	18	17	34	27	17	26	23	33	28	18	15	18	14	16	14	20	17	19	19	16	18	24	26	25	28	22	24	28	17	20	26	2	39	4	23	4	23	6	19
[truncated: 86 more columns]
